# Supplementary material for: Synthesis of novel [3,1]-benzothiazepine and [3,1]-benzoxazepine derivatives with antitumoral activity
Source: Royal Society of Chemistry journal article supplement (doi:10.1039/c3ra44937h), 2014-01-01
Supplement: c3ra44937h1.pdf [file c3ra44937h1.pdf]

## **Synthesis of Novel [3,1]-Benzothiazepines and [3,1]-Benzoxazepines Derivatives with Antitumoral Activity**

Walter R. Martínez, Gardenia C. G. Militão, Teresinha G. da Silva, Ricardo O. Silva,

Paulo H. Menezes

### **Contents**

|                                 |     |
|---------------------------------|-----|
| 1. General Remarks.....         | S2  |
| 2. Experimental Procedures..... | S3  |
| 3. Spectra.....                 | S10 |

## 1. General Remarks

### 1.1. Material

All reagents and solvents used were previously purified and dried in agreement with the literature.<sup>1</sup> Isothiocyanates and isocyanates were purchased from Aldrich Chemical Co. All other commercially available reagents were used as received. Reactions were monitored by thin-layer chromatography on 0.25 mm E. Merck silica gel 60 plates (F<sub>254</sub>) using UV light as visualizing agents. Column chromatography purification was performed using Silica Gel 60 (230-400 mesh). All compounds purified by chromatography were sufficiently pure for use in further experiments.

### 1.2. Instrumentation

All spectra were performed at 300 and 75 MHz to <sup>1</sup>H and <sup>13</sup>C nuclei, respectively using a 5 mm PFG probe. The samples were solubilized in DMSO-*d*<sub>6</sub> or CDCl<sub>3</sub> and the residual signal of solvent was used as reference to chemical shift in <sup>1</sup>H and <sup>13</sup>C NMR spectrum. Pulse sequence *g*HMQC was optimized to <sup>1</sup>J<sub>C,H</sub> equal to 140 Hz, acquisition time equal to 0.228 s, relaxation delay equal to 1.00 s and 4 transients x 512 increments were used. Pulse sequence *g*HMBC was optimized to <sup>3</sup>J<sub>C,H</sub> equal to 8.0 Hz, acquisition time equal to 0.228 s, relaxation delay equal to 1.00 s and 8 transients x 400 increments were used. Low resolution mass spectra (70 eV) used helium 4.5 as a carrier gas and a DB-5 column (30 m x 0.25μm). The melting points (mp) are not corrected.

---

<sup>1</sup> Perrin, D. D.; Armarego, W. L. F. *In Purification of Laboratory Chemicals*; Pergamon: Oxford, 1980.

## 2. Additional Experimental Procedures

**2.1 General procedure for the preparation of *N*-allyl-arylamines (2a-d)** A 100 mL round-bottomed flask equipped with a magnetic stirring bar was charged with Na<sub>2</sub>CO<sub>3</sub> (1.4g, 10 mmol) followed by DMF (250 mL) and the appropriate arylamine (1.5 equiv, 15 mmol). Allyl bromide (1.20 g, 1.0 equiv, 10 mmol) was then added using an addition funnel over an 8h period at 0°C. The reaction mixture was stirred for additional 16 h at room temperature and then filtered. The solution was diluted with CH<sub>2</sub>Cl<sub>2</sub> (2 x 50 mL) and washed with water. The combined organic phases were dried over MgSO<sub>4</sub>, filtered, and solvents were removed under reduced pressure followed by purification by a flash column chromatography [hexanes:EtOAc (60:1)].

***N*-allyl-aniline (2a):** Isolated as a yellow oil; obtained 1.0 g (77%); IR (thin film)  $\nu_{\max}$  3413, 1643, 1603, 1506, 1316, 1262, 994, 920, 750, 693, 509 cm<sup>-1</sup>; <sup>1</sup>H NMR (300 MHz, CDCl<sub>3</sub>)  $\delta$  3.79 (br s, 1H, -NH), 3.83 (dt,  $J$  = 5.4, 1.5 Hz, 2H, N-CH<sub>2</sub>), 5.24 (dq,  $J$  = 10.5, 1.5 Hz, 1H, =CH<sub>A</sub>H), 5.36 (dq,  $J$  = 16.8, 1.5 Hz, 1H, =CH<sub>B</sub>H), 6.09-5.96 (m, 1H, -CH=), 6.70 (dd,  $J$  = 8.2, 1.0 Hz, 2H, H-2, H-6), 6.79 (t,  $J$  = 7.5 Hz, 1H, H-4), 7.23-7.17 (m, 2H, H-3, H-5); <sup>13</sup>C NMR (75 MHz, CDCl<sub>3</sub>)  $\delta$  46.4 (N-CH<sub>2</sub>), 112.9 (2C, C-2, C-6), 116.1 (=CH<sub>2</sub>), 117.4 (C-4), 129.1 (2C, C-3, C-5), 135.3 (-CH=), 147.9 (C-1); MS(EI-70 eV)  $m/z$  (%): 133 (M<sup>+</sup>, 82), 106 (100), 104 (29), 92 (10), 77 (76), 65 (92).

***N*-allyl-4-chloro-aniline (2b):** Isolated as a yellow oil; obtained 1.22 g (73%); IR (thin film)  $\nu_{\max}$  3421, 1645, 1600, 1502, 1316, 994, 922, 815, 506 cm<sup>-1</sup>; <sup>1</sup>H NMR (300 MHz, CDCl<sub>3</sub>)  $\delta$  3.76 (dt,  $J$  = 5.4, 1.5 Hz, 2H, N-CH<sub>2</sub>), 5.20 (dq,  $J$  = 10.2, 1.5 Hz, 1H, =CH<sub>A</sub>H), 5.29 (dq,  $J$  = 17.4, 1.5 Hz, 1H, =CH<sub>B</sub>H), 6.01-5.88 (m, 1H, -CH=), 6.57 (d,  $J$  = 9.0 Hz, 2H, H-2, H-6), 7.14 (d,  $J$  = 9.0 Hz, 1H, H-3, H-5); <sup>13</sup>C NMR (75 MHz, CDCl<sub>3</sub>)  $\delta$  46.7 (N-CH<sub>2</sub>), 114.2 (2C, C-2, C-6), 116.6 (=CH<sub>2</sub>), 122.3 (C-4), 134.7 (-CH=), 129.0 (2C, C-3, C-5), 146.2 (C-1); MS(EI-70 eV)  $m/z$  (%): 167 (M<sup>+</sup>, <sup>35</sup>Cl, 92), 140 (100), 138 (37), 126 (17), 111 (21), 99 (31).

***N*-allyl-4-fluoro-aniline (2c):** Isolated as a yellow oil; obtained 1.14 g (75%); IR (thin film)  $\nu_{\max}$  3423, 1602, 1514, 1219, 922, 822 cm<sup>-1</sup>; <sup>1</sup>H NMR (400 MHz, CDCl<sub>3</sub>)  $\delta$  3.69 (br s, 1H, -NH), 3.74 (d,  $J$  = 5.2 Hz, 2H, N-CH<sub>2</sub>), 5.19 (dd,  $J$  = 10.4, 1.6 Hz, 1H, =CH<sub>A</sub>H), 5.30 (dd,  $J$  = 17.2, 1.6 Hz, 1H, =CH<sub>B</sub>H), 6.10-5.88 (m, 1H, -CH=), 6.72-6.50 (m, 2H, H-2, H-6), 7.09-6.83 (m, 2H, H-3, H-5); <sup>13</sup>C NMR (100 MHz, CDCl<sub>3</sub>)  $\delta$  47.1 (N-CH<sub>2</sub>), 113.7 (d,  $J$  = 6.9 Hz, 2C, C-2, C-6), 115.5 (d,  $J$  = 22.5 Hz, 2C, C-3, C-5), 116.2 (=CH<sub>2</sub>), 135.3 (-CH=), 144.4 (C-1), 155.8 (d,  $J$  = 233.9, C-4); MS(EI-70 eV)  $m/z$  (%): 151 (M<sup>+</sup>, 85), 124 (100), 122 (24), 110 (20), 95 (29), 83 (38).

***N*-allyl-naphthylamine (2d):** Isolated as a red oil; obtained 1.63 g (89%); IR (thin film)  $\nu_{\max}$  3440, 1643, 1582, 1525, 1480, 1407, 993, 920, 769, 570, 421 cm<sup>-1</sup>; <sup>1</sup>H NMR (300 MHz, CDCl<sub>3</sub>)  $\delta$  3.98 (dt,  $J$  = 5.7, 1.5 Hz, 2H, N-CH<sub>2</sub>-), 5.27 (dd,  $J$  = 10.5, 1.8 Hz, 1H, =CH<sub>A</sub>H), 5.40 (dd,  $J$  = 16.8, 1.8 Hz, 1H, =CH<sub>B</sub>H), 6.18-6.05 (m, 1H, -CH=), 6.66 (d,  $J$  = 7.5 Hz, 1H, H-2), 7.29 (d,  $J$  = 7.8 Hz, 1H, H-4), 7.38 (dd,  $J$  = 7.8, 7.5 Hz, 1H, H-3), 7.51-7.44 (m, 2H, H-6, H-7), 7.86-7.81 (m, 2H, H-5, H-8); <sup>13</sup>C NMR (75 MHz, CDCl<sub>3</sub>)  $\delta$  46.8 (N-CH<sub>2</sub>), 104.9 (C-2), 116.7 (=CH<sub>2</sub>), 117.6 (C-4), 119.8 (C-8), 123.4 (C-8a), 124.7 (C-7), 125.7 (C-6), 126.5 (C-3), 128.7 (C-5),

134.2 (C-4a), 135.0 (-CH=), 142.9 (C-1); MS(EI-70 eV)  $m/z$  (%): 183 ( $M^{+}$ , 94), 156 (12), 154 (14), 142 (33), 127 (22), 115 (100).

**2.2 General procedure for the preparation of 2-allyl-arylamines (3a-d)** A 25 mL round-bottomed flask equipped with a reflux condenser was charged with the appropriate *N*-allyl-arylamine (**2a-d**) (1.0 equiv, 1.0 mmol) and  $BF_3 \cdot OEt_2$  (212 mg, 1.5 equiv, 1.5 mmol). The reaction mixture was heated at 140 °C (**3a-c**) or 114 °C (**3d**) for 12 hours, then treated with a saturated aqueous solution of  $Na_2CO_3$  (10 mL) and extracted with  $CH_2Cl_2$  (2x 50 mL). The combined organic phases were dried with  $MgSO_4$ , filtered, and solvents were removed under reduced pressure followed by purification by a flash column chromatography [hexanes:EtOAc (40:1)].

**2-Allyl-aniline (3a):** Isolated as a yellow oil; obtained 0.83 g (62%); IR (thin film)  $\nu_{max}$  3448, 3369, 1622, 1494, 1458, 916, 751  $cm^{-1}$ ;  $^1H$  NMR (300 MHz,  $CDCl_3$ )  $\delta$  3.34 (d,  $J$  = 6.3 Hz, 2H,  $-CH_2-$ ), 3.71 (br s, 2H,  $-NH_2$ ), 5.18-5.10 (m, 2H,  $=CH_2$ ), 6.05-5.91 (m, 1H,  $-CH=$ ), 6.72 (d,  $J$  = 7.5 Hz, 1H, H-6), 6.79 (t,  $J$  = 7.0 Hz, 1H, H-4), 7.07-7.12 (m, 2H, H-3, H-5);  $^{13}C$  NMR (75 MHz,  $CDCl_3$ )  $\delta$  36.4 ( $-CH_2-$ ), 115.9 (C-6), 116.1 ( $=CH_2$ ), 119.0 (C-4), 124.1 (C-2), 127.5 (C-5), 130.1 (C-3), 135.8 ( $-CH=$ ), 144.4 (C-1); MS(EI-70 eV)  $m/z$  (%): 133 ( $M^{+}$ , 100), 118 (71), 106 (49), 132 (68), 91(22).

**2-allyl-4-chloro-aniline (3b):** Isolated as a yellow oil; obtained 1.21 g (72%); IR (thin film)  $\nu_{max}$  3458, 3381, 1622, 1491, 1415, 1284, 997, 920, 814  $cm^{-1}$ ;  $^1H$  NMR (400 MHz,  $CDCl_3$ )  $\delta$  3.26 (d,  $J$  = 6.0 Hz, 2H,  $-CH_2-$ ), 3.67 (br s, 2H,  $-NH_2$ ), 5.11 (d,  $J$  = 17.2 Hz, 1H,  $=CHH_b$ ), 5.16 (d,  $J$  = 10.0 Hz, 1H,  $=CH_aH$ ), 5.97-5.87 (m, 1H,  $-CH=$ ), 6.61 (dd,  $J$  = 6.4, 2.8 Hz, 1H, H-6), 7.03-7.01 (m, 2H, H-3, H-5);  $^{13}C$  NMR (100 MHz,  $CDCl_3$ )  $\delta$  36.2 ( $-CH_2-$ ), 116.7 ( $=CH_2$ ), 116.8 (C-6), 123.3 (C-4), 125.7 (C-2), 127.1 (C-5), 129.7 (C-3), 134.9 ( $-CH=$ ), 143.0 (C-1); MS(EI-70 eV)  $m/z$  (%): 167 ( $M^{+}$ ,  $^{35}Cl$ , 100), 152 (35), 140 (33), 132 (56), 125(6), 117 (76).

**2-allyl-4-fluoro-aniline (3c):** Isolated as a yellow oil; obtained 1.10 g (73%); IR (thin film)  $\nu_{max}$  3446, 3369, 1626, 1500, 1234, 918, 814  $cm^{-1}$ ;  $^1H$  NMR (300 MHz,  $CDCl_3$ )  $\delta$  3.27 (d,  $J$  = 6.0 Hz, 2H,  $-CH_2-$ ), 3.54 (br s, 2H,  $-NH_2$ ), 5.20-5.07 (m, 2H,  $=CH_2$ ), 6.00-5.90 (m, 1H,  $-CH=$ ), 6.65-6.59 (m, 1H, H-6), 6.84-6.74 (m, 2H, H-3, H-5);  $^{13}C$  NMR (75 MHz,  $CDCl_3$ )  $\delta$  36.1 ( $-CH_2-$ ), 113.5 (d,  $J$  = 21.8 Hz, C-5), 116.3 (d,  $J$  = 20.1 Hz, C-3), 116.5 (d,  $J$  = 5.8 Hz, C-6), 116.6 ( $=CH_2$ ), 125.6 (d,  $J$  = 6.8 Hz, C-2), 134.9 ( $-CH=$ ), 140.5 (C-1), 156.3 (d,  $J$  = 234.6 Hz, C-4) MS(EI-70 eV)  $m/z$  (%): 151 ( $M^{+}$ ,  $^{35}Cl$ , 100), 136 (74), 124 (45), 132 (4).

**2-allyl-naphthylamine (3d):** Isolated as a red oil; obtained 1.48 g (81%); IR (thin film)  $\nu_{max}$  3466, 3386, 3054, 1622, 1433, 1400, 996, 916, 802, 754  $cm^{-1}$ ;  $^1H$  NMR (300 MHz,  $CDCl_3$ )  $\delta$  3.56 (d,  $J$  = 6.3 Hz, 2H,  $-CH_2-$ ), 4.17 (br s, 2H,  $-NH_2$ ), 5.30-5.17 (m, 2H,  $=CH_2$ ), 5.96-5.86 (m, 1H,  $-CH=$ ), 7.31 (d, 8.1 Hz, 1H, H-4), 7.40 (d,  $J$  = 8.4 Hz, 1H, H-3), 7.56-7.49 (m, 2H, H-6, H-7), 7.91-7.84 (m, 2H, H-5, H-8);  $^{13}C$  NMR (75 MHz,  $CDCl_3$ )  $\delta$  36.7 ( $-CH_2-$ ), 115.9 ( $=CH_2$ ), 117.6 (C-2), 118.3 (C-4), 120.2 (C-8), 123.5 (C-8a), 124.7 (C-7), 125.0 (C-6), 128.3 (C-3), 128.7 (C-5), 133.2 (C-4a), 135.5 ( $-CH=$ ), 139.4 (C-1); MS(EI-70 eV)  $m/z$  (%): 183 ( $M^{+}$ , 100) 168 (31), 156 (14), 182 (33), 141 (9).

**2.3 General procedure for the syntheses of [3,1]-benzothiazepines (4b-k) and [3,1]-benzoxazepines (5a-c).** A mixture of **3a-d** (1.0 equiv, 1.0 mmol) and the appropriate isothiocyanate or isocyanate (1.0 equiv, 1.0 mmol) in the appropriate solvent (dichloromethane for isothiocyanates and tetrahydrofuran for isocyanates) was heated to reflux and the progress of reaction was monitored by TLC. A 1M solution of iodine in dichloromethane (1 mL) was then added at room temperature and the mixture were stirred for 3h (**4b-k**) or 24h (**5a-c**). After this period, the reaction mixture was washed with a saturated aqueous solution of Na<sub>2</sub>S<sub>2</sub>O<sub>3</sub> (10 mL) and extracted with dichloromethane (2 x 50 mL). The combined organic phases were dried over MgSO<sub>4</sub>, filtered, and solvents were removed under reduced pressure followed by purification by a flash column chromatography [hexanes:EtOAc (21:1)].

**2-(1'-amino-4'-chlorophenyl)-7-chloro-4-iodomethyl-4,5-dihydrobenzo[d][3,1]thiazepine (4b):** Isolated as a yellow solid (mp 119-120 °C); obtained 0.34 g (74%); IR (KBr)  $\nu_{\max}$  3386, 1618, 1506, 1306, 1114, 822, 565 cm<sup>-1</sup>; <sup>1</sup>H NMR (300 MHz, DMSO-*d*<sub>6</sub>)  $\delta$  2.69 (dd, *J* =13.2, 9.9 Hz, 1H, H<sub>b</sub>-5), 3.14 (dd, *J* =13.2, 4.8 Hz, 1H, H<sub>a</sub>-5), 3.58 (d, *J* = 6.6 Hz, 2H, -CH<sub>2</sub>-I), 4.24-3.97 (m, 1H, H-4), 6.89 (d, *J* =8.4 Hz, 1H, H-9), 7.26 (dd, *J* =8.4, 2.1 Hz, 1H, H-8), 7.31 (d, *J* =2.1 Hz, 1H, H-6), 7.34 (d, *J* =9.0 Hz, 2H, H-2', H-6'), 7.91 (d, *J* =9.0 Hz, 2H, H-3', H-5'), 9.81 (s, 1H, -NH); <sup>13</sup>C NMR (100 MHz, CDCl<sub>3</sub>)  $\delta$  10.8 (-CH<sub>2</sub>-I), 37.4 (C-5), 56.5 (C-4), 121.6 (C-9), 125.1 (2C, C-2', C-6'), 128.3 (C-8), 129.0 (2C, C-3', C-5'), 129.1 (C-6), 129.2 (C-5a) 129.8 (C-4'), 131.1 (C-7), 137.6 (C-1'), 141.0 (C-9a). HRMS (ESI, *m/z*) calcd for C<sub>16</sub>H<sub>14</sub>Cl<sub>2</sub>IN<sub>2</sub>S [M + H]<sup>+</sup>: 462.9299; found: 462.9300.

**2-(1'-amino-3',4'-dimethylphenyl)-7-choro-4-iodomethyl-4,5-dihydrobenzo[d][3,1]thiazepine (4c):** Isolated as a white solid (mp 126-127 °C); obtained 0.17 g (37%); IR (KBr)  $\nu_{\max}$  3400, 1604, 1506, 1309, 1157, 818, 546 cm<sup>-1</sup>; <sup>1</sup>H NMR (300 MHz, DMSO-*d*<sub>6</sub>)  $\delta$  2.16 (s, 3H, -CH<sub>3</sub>), 2.18 (s, 3H, -CH<sub>3</sub>), 2.66 (dd, *J* =13.2, 11.7 Hz, 1H, H<sub>b</sub>-5), 3.14 (dd, *J* =13.2, 4.8 Hz, 1H, H<sub>a</sub>-5), 3.66-3.51 (m, 2H, -CH<sub>2</sub>-I), 4.05 (br s, 1H, H-4), 6.86 (d, *J* =8.7 Hz, 1H, H-9), 7.04 (d, *J* =8.1 Hz, 1H, H-5'), 7.25 (dd, *J* =8.7, 2.4 Hz, 1H, H-8), 7.29 (d, *J* =2.4 Hz, 1H, H-6), 7.59 (d, *J* =8.1 Hz, 1H, H-6'), 7.60 (s, 1H, H-2'), 9.48 (s, 1H, -NH); <sup>13</sup>C NMR (100 MHz, CDCl<sub>3</sub>)  $\delta$  11.1 (-CH<sub>2</sub>-I), 19.1 (-CH<sub>3</sub>), 19.9 (-CH<sub>3</sub>), 37.5 (C-5), 56.2 (C-4), 117.6 (C-5'), 121.3 (C-9), 125.0 (C-6), 128.0 (C-8), 128.3 (C-5a), 128.9 (C-2'), 129.7 (C-6'), 131.1 (C-7), 132.4 (C-4'), 137.1 (C-3'), 137.2 (C-1'), 146.0 (C-9a). HRMS (ESI, *m/z*) calcd for C<sub>18</sub>H<sub>19</sub>ClIN<sub>2</sub>S [M + H]<sup>+</sup>: 457.0002; found: 457.0002.

**2-(1'-amino-naphthyl)-7-chloro-4-iodomethyl-4,5-dihydrobenzo[d][3,1]thiazepine (4d):** Isolated as a yellow solid (mp 113-114 °C); obtained 0.30 g (63%); IR (KBr)  $\nu_{\max}$  3384, 1610, 1570, 1521, 1476, 1141, 771, 554 cm<sup>-1</sup>; <sup>1</sup>H NMR (400 MHz, CDCl<sub>3</sub>)  $\delta$  2.95 (t, *J* =12.8 Hz, 1H, H<sub>b</sub>-5), 3.26 (d, *J* = 9.6 Hz, 1H, H<sub>a</sub>-5), 3.45 (d, *J* =10.0 Hz, 2H, -CH<sub>2</sub>-I), 3.96 (br s, 1H, H-4), 6.94 (d, *J* =6.0 Hz, 1H, H-9), 7.26 (br s, 2H, H-6, H-8), 7.66-7.43 (m, 3H, H-6', H-7', H-8'), 7.73 (d, *J* =7.2 Hz, 1H, H-4'), 8.02-7.87 (m, 2H, H-3', H-5'), 8.08 (br s, 1H, H-2'); <sup>13</sup>C NMR (100 MHz, CDCl<sub>3</sub>)  $\delta$  11.1 (-CH<sub>2</sub>-I), 37.5 (C-5), 55.6 (C-4), 120.0 (C-4'), 121.0 (C-8'), 124.9 (C-9), 125.4 (C-8), 125.7 (C-6'), 126.2 (C-2'), 126.4 (C-3'), 126.8 (C-5a), 128.1 (C-7'), 128.8 (C-5'), 128.9 (C-1'), 129.1 (C-6), 130.4 (C-8a'), 131.5 (C-7), 134.2 (C-4a'), 149.5 (C-9a).HRMS (ESI, *m/z*) calcd for C<sub>20</sub>H<sub>17</sub>ClIN<sub>2</sub>S[M + H]<sup>+</sup>: 478.9846; found: 478.9846.

**2-(1'-amino-4'-chlorophenyl)-7-fluoro-4-iodomethyl-4,5-dihydrobenzo[d][3,1]thiazepine (4e):** Isolated as a yellow solid (mp 117-118 °C); obtained 0.31 g (69%); IR (KBr)  $\nu_{\max}$  3413, 1620, 1479, 1304, 1140, 815  $\text{cm}^{-1}$ ;  $^1\text{H}$  NMR (300 MHz, DMSO- $d_6$ )  $\delta$  2.68 (dd,  $J$  = 13.2, 10.2 Hz, 1H, H<sub>b</sub>-5), 3.14 (dd,  $J$  = 13.2, 4.5 Hz, 1H, H<sub>a</sub>-5), 3.58 (d,  $J$  = 6.6 Hz, 2H, -CH<sub>2</sub>-I), 4.15-4.01 (m, 1H, H-4), 6.89 (dd,  $J$  = 8.4, 5.4 Hz, 1H, H-9), 7.04 (dd,  $J$  = 8.4, 2.7 Hz, 1H, H-8), 7.11 (dd,  $J$  = 9.3, 2.7 Hz, 1H, H-6), 7.34 (d,  $J$  = 9.0 Hz, 2H, H-2', H-6'), 7.92 (d,  $J$  = 9.0 Hz, 2H, H-3', H-5'), 9.76 (s, 1H, -NH);  $^{13}\text{C}$  NMR (100 MHz, CDCl<sub>3</sub>)  $\delta$  11.0 (-CH<sub>2</sub>-I), 37.5 (C-5), 56.5 (C-4), 114.8 (d,  $J$  = 22.5 Hz, C-8), 115.8 (d,  $J$  = 22.4 Hz, C-6), 121.1 (2C, C-2', C-6'), 125.0 (d,  $J$  = 7.8 Hz, C-9), 128.6 (C-4'), 128.9 (2C, C-3', C-5'), 130.9 (d,  $J$  = 7.8 Hz, C-5a), 138.0 (C-1'), 159.0 (d,  $J$  = 241.6 Hz, C-7). HRMS (ESI, m/z) calcd for C<sub>16</sub>H<sub>14</sub>ClFIN<sub>2</sub>S [M + H]<sup>+</sup>: 446.9595; found: 446.9595.

**2-(1'-amino-naphthyl)-7-fluoro-4-iodomethyl-4,5-dihydrobenzo[d][3,1]thiazepine (4f):** Isolated as a yellow solid (mp 116-117 °C); obtained 0.35 g (76%); IR (KBr)  $\nu_{\max}$  3444, 1620, 1479, 1238, 1134, 775  $\text{cm}^{-1}$ ;  $^1\text{H}$  NMR (300 MHz, DMSO- $d_6$ )  $\delta$  2.90-2.70 (m, 1H, H<sub>b</sub>-5), 3.23 (dd,  $J$  = 13.2, 4.2 Hz, 1H, H<sub>a</sub>-5), 3.56 (br s, 2H, -CH<sub>2</sub>-I), 3.98 (br s, 1H, H-4), 6.74 (br s, 1H, H-9), 7.06-6.96 (m, 1H, H-6), 7.11 (dd, 9.0, 2.7 Hz, 1H, H-8), 7.62-7.46 (m, 4H, H-3', H-6', H-7', H-8'), 7.81-7.71 (m, 1H, H-4'), 7.98-7.89 (m, 1H, H-5'), 8.12-8.00 (m, 1H, H-2');  $^{13}\text{C}$  NMR (100 MHz, CDCl<sub>3</sub>)  $\delta$  11.0 (-CH<sub>2</sub>-I), 37.5 (C-5), 55.4 (C-4), 114.8 (d,  $J$  = 21.7 Hz, C-8), 115.9 (d,  $J$  = 23.3 Hz, C-6), 119.8 (C-4'), 121.0 (C-8'), 125.0 (d,  $J$  = 8.6 Hz, C-9), 125.3 (C-7'), 125.7 (C-6'), 126.1 (C-2'), 126.3 (C-3'), 126.9 (C-5a), 128.7 (C-5'), 134.4 (C-4'a), 147.1 (C-9a), 159.1 (d,  $J$  = 241.6 Hz, C-7). HRMS (ESI, m/z) calcd for C<sub>20</sub>H<sub>17</sub>FIN<sub>2</sub>S [M + H]<sup>+</sup>: 463.0141; found: 463.0141.

**2-(1'-amino-phenyl)-4-iodomethyl-4,5-dihydronaphtho[1,2-d][3,1]thiazepine (4g):** Isolated as a white solid (mp 139-140 °C); obtained 0.23 g (52%); IR (KBr)  $\nu_{\max}$  3484, 1610, 1585, 1514, 1381, 1309, 809, 754, 689, 576  $\text{cm}^{-1}$ ;  $^1\text{H}$  NMR (400 MHz, CDCl<sub>3</sub>)  $\delta$  3.06 (dd,  $J$  = 13.6, 9.6 Hz, 1H, H<sub>b</sub>-5), 3.36 (dd,  $J$  = 13.6, 4.4 Hz, 1H, H<sub>a</sub>-5), 3.57-3.46 (m, 2H, -CH<sub>2</sub>-I), 4.25-4.14 (m, 1H, H-4), 7.16 (t,  $J$  = 7.2 Hz, 1H, H-4'), 7.38 (d,  $J$  = 8.4 Hz, 1H, H-11), 7.43 (d,  $J$  = 7.6 Hz, 2H, H-2', H-6'), 7.53-7.45 (m, 2H, H-7, H-9), 7.60 (d,  $J$  = 8.4 Hz, 1H, H-10), 8.32-8.24 (m, 1H, H-8), 7.84-7.80 (m, 1H, H-6), 7.88 (d,  $J$  = 7.6 Hz, 2H, H-3', H-5');  $^{13}\text{C}$  NMR (100 MHz, CDCl<sub>3</sub>)  $\delta$  11.3 (-CH<sub>2</sub>-I), 37.9 (C-5), 59.2 (C-4), 119.7 (C-2', C-6'), 123.6 (C-10), 123.7 (C-8), 124.2 (C-4'), 125.7 (C-9), 125.8 (C-7), 127.5 (C-6), 127.6 (C-11), 128.5 (C-11a), 129.1 (C-3', C-5'), 133.5 (C-7a), 139.8 (C-1'), 147.2 (C-11b). HRMS (ESI, m/z) calcd for C<sub>20</sub>H<sub>18</sub>IN<sub>2</sub>S [M + H]<sup>+</sup>: 445.0230; found: 445.0131.

**2-(1'-amino-4'-chlorophenyl)-4-iodomethyl-4,5-dihydronaphtho[1,2-d][3,1]thiazepine (4h):** Isolated as a yellow solid (mp 131-132 °C); obtained 0.37 g (77%); IR (KBr)  $\nu_{\max}$  3398, 1603, 1581, 1503, 1395, 1301, 1242, 807, 754, 681, 545, 433  $\text{cm}^{-1}$ ;  $^1\text{H}$  NMR (300 MHz, Acetone- $d_6$ )  $\delta$  3.03 (dd,  $J$  = 13.5, 9.9 Hz, 1H, H<sub>b</sub>-5), 3.40 (dd,  $J$  = 13.5, 4.5 Hz, 1H, H<sub>a</sub>-5), 3.63 (dd,  $J$  = 10.2, 5.7 Hz, 1H, -CHH<sub>c</sub>-I), 3.69 (dd,  $J$  = 18.3, 10.2 Hz, 1H, -CHH<sub>d</sub>-I), 4.26-4.24 (m, 1H, H-4), 7.41 (d,  $J$  = 8.7 Hz, 2H, H-3', H-5'), 7.44 (d,  $J$  = 8.1 Hz, 1H, H-6), 7.50-7.47 (m, 2H, H-8, H-9), 7.61 (d,  $J$  = 8.1 Hz, 1H, H-7), 7.87-7.84 (m, 1H, H-10), 8.16 (d,  $J$  = 8.7 Hz, 2H, H-2', H-6'), 8.20 (dd,  $J$  = 9.9, 5.4 Hz, 1H, H-11), 8.98 (br s, 1H, -NH);  $^{13}\text{C}$  NMR (75 MHz, Acetone- $d_6$ )  $\delta$  12.8 (-CH<sub>2</sub>-I), 38.9 (C-5), 60.2 (C-4), 122.2 (2C, C-2', C-6'), 124.0 (C-7), 125.0 (C-11), 126.4 (2C, C-8, C-9), 126.6 (C-11a), 128.1 (C-4'), 128.5 (C-10), 128.7 (C-6), 129.5 (3C, C-5a, C-5', C-3'), 134.6 (C-7a), 141.5 (C-1'), 144.5 (C-11b), 178.0 (C-2). HRMS (ESI, m/z) calcd for C<sub>20</sub>H<sub>17</sub>ClIN<sub>2</sub>S [M + H]<sup>+</sup>: 478.9840; found: 478.9860.

**2-(1'-amino-4'-fluorophenyl)-4-iodomethyl-4,5-dihydronaphtho[1,2-d][3,1]thiazepine (4i):** Isolated as a white solid (mp 118-119 °C); obtained 0.32 g (70%); IR (KBr)  $\nu_{\max}$  3392, 1602, 1587, 1502, 1401, 1307, 1211, 1152, 835, 750, 680, 557, 433  $\text{cm}^{-1}$ ;  $^1\text{H}$  NMR (400 MHz, DMSO- $d_6$ )  $\delta$  2.91 (dd,  $J$  =13.6, 10.0 Hz, 1H, H<sub>b</sub>-5), 3.28 (dd,  $J$  =13.6, 4.8 Hz, 1H, H<sub>a</sub>-5), 3.64-3.61 (m, 2H, -CH<sub>2</sub>-I), 4.29-4.16 (m, 1H, H-4), 7.21 (t,  $J$  =8.8 Hz, 2H, H-3', H-5'), 7.40 (d,  $J$  =8.4 Hz, 1H, H-6), 7.50-7.43 (m, 2H, H-8, H-9), 7.58 (d,  $J$  =8.4, 1H, H-7), 7.87-7.85 (m, 1H, H-10), 8.10-8.06 (m, 3H, H-11, H-2', H-6'), 9.84 (s, 1H, -NH);  $^{13}\text{C}$  NMR (100 MHz, DMSO- $d_6$ )  $\delta$  13.4 (-CH<sub>2</sub>-I), 37.8 (C-5), 58.7 (C-4), 115.1 (d,  $J$  =21.5 Hz, 2C, C-3', C-5'), 121.4 (d,  $J$  =8.2 Hz, 2C, C-2', C-6'), 122.4 (C-10), 123.6 (C-8), 125.2 (C-5a), 125.4 (C-9), 125.6 (C-7), 127.5 (C-6), 127.8 (C-11), 128.0 (C-11a), 133.0 (C-7a), 137.4 (C-1'), 147.6 (C-11b), 156.6 (d,  $J$  =238.9 Hz, C-4'). HRMS (ESI, m/z) calcd for C<sub>20</sub>H<sub>17</sub>FIN<sub>2</sub>S [M + H]<sup>+</sup>: 463.0141; found: 463.0141.

**2-(1'-amino-4'-methoxyphenyl)-4-iodomethyl-4,5-dihydronaphtho[1,2-d][3,1]thiazepine (4j):** Isolated as a yellow solid (mp 69-70 °C); obtained 0.30 g (64%); IR (KBr)  $\nu_{\max}$  3386, 1604, 1585, 1507, 1241, 810, 752  $\text{cm}^{-1}$ ;  $^1\text{H}$  NMR (400 MHz, CDCl<sub>3</sub>)  $\delta$  3.05 (dd,  $J$  =13.6, 9.6 Hz, 1H, H<sub>a</sub>-5), 3.36 (dd,  $J$  =13.6, 4.4 Hz, 1H, H<sub>b</sub>-5), 3.51-3.47 (m, 2H, -CH<sub>2</sub>-I), 3.84 (s, 3H, -OCH<sub>3</sub>), 4.20-4.10 (m, 1H, H-4), 6.95 (d,  $J$  =8.4 Hz, 2H, H-2', H-6'), 7.37 (d,  $J$  =8.4 Hz, 1H, H-6), 7.49-7.43 (m, 2H, H-8, H-9), 7.57 (d,  $J$  =8.4 Hz, 1H, H-7), 7.77 (d,  $J$  =8.4 Hz, 2H, H-3', H-5'), 7.83-7.79 (m, 1H, H-10), 8.25-8.19 (m, 1H, H-11);  $^{13}\text{C}$  NMR (100 MHz, CDCl<sub>3</sub>)  $\delta$  11.3 (-CH<sub>2</sub>-I), 38.0 (C-5), 55.5 (-OCH<sub>3</sub>), 58.8 (C-4), 114.2 (2C, C-2, C-6'), 121.6 (2C, C-3', C-5'), 123.4 (C-8), 124.3 (C-10), 124.9 (C-5a), 125.6 (C-9), 125.8 (C-7), 127.4 (C-6), 127.5 (C-11), 128.6 (C-11a), 133.1 (C-1'), 133.5 (C-11b), 156.1 (C-4'). HRMS (ESI, m/z) calcd for C<sub>21</sub>H<sub>20</sub>IN<sub>2</sub>OS [M + H]<sup>+</sup>: 475.0336; found: 475.0342.

**2-(1'-amino-3',4'-dimethylphenyl)-4-iodomethyl-4,5-dihydronaphtho[1,2-d][3,1]thiazepine (4k):** Isolated as a white solid (mp 135-136 °C); obtained 0.35 g (74%); IR (KBr)  $\nu_{\max}$  3421, 1606, 1589, 1500, 1388, 1157, 818, 752, 537  $\text{cm}^{-1}$ ;  $^1\text{H}$  NMR (400 MHz, DMSO- $d_6$ )  $\delta$  2.20 (s, 3H, -CH<sub>3</sub>), 2.23 (s, 3H, -CH<sub>3</sub>), 2.91 (dd,  $J$  =13.6, 10.0 Hz, 1H, H<sub>a</sub>-5), 3.28 (dd,  $J$  =13.6, 4.4 Hz, 1H, H<sub>b</sub>-5), 3.61 (d,  $J$  =7.2 Hz, 2H, -CH<sub>2</sub>-I), 4.26-4.16 (m, 1H, H-4), 7.11 (d,  $J$  =8.4 Hz, 1H, H-6'), 7.40 (d,  $J$  =8.4 Hz, 1H, H-6), 7.49-7.43 (m, 2H, H-8, H-9), 7.56 (d,  $J$  =8.4 Hz, 1H, H-7), 7.76 (d,  $J$  =8.4 Hz, 1H, H-5'), 7.87-7.82 (m, 2H, H-2', H-10), 8.12 (d,  $J$  =7.6 Hz, 1H, H-11), 9.60 (s, 1H, -NH);  $^{13}\text{C}$  NMR (100 MHz, DMSO- $d_6$ )  $\delta$  13.3 (-CH<sub>2</sub>-I), 18.8 (-CH<sub>3</sub>), 19.7 (-CH<sub>3</sub>), 37.8 (C-5), 58.3 (C-4), 117.4 (C-5'), 121.1 (1C, C-2'), 122.2 (C-10), 123.6 (C-8), 125.0 (C-5a), 125.3 (C-7), 125.5 (C-9), 127.4 (C-6), 127.8 (C-11), 128.1 (C-11a), 129.4 (C-6'), 130.4 (C-4'), 133.0 (C-7a), 135.9 (C-3'), 138.7 (C-1'), 147.4 (C-11b). HRMS (ESI, m/z) calcd for C<sub>22</sub>H<sub>22</sub>IN<sub>2</sub>S [M + H]<sup>+</sup>: 473.0543; found: 473.0552.

**4-(iodomethyl)-N-phenyl-4,5-dihydrobenzo[d][1,3]oxazepin-2-amine (5a):** Isolated as a white solid (mp 150-151 °C); obtained 0.18 g (47%); IR (KBr)  $\nu_{\max}$  3315, 1643, 1522, 1375, 748  $\text{cm}^{-1}$ ;  $^1\text{H}$  NMR (300 MHz, DMSO- $d_6$ )  $\delta$  2.94 (dd,  $J$  =16.2, 2.1 Hz, 1H, H<sub>a</sub>-5), 3.42 (dd,  $J$  =16.2, 7.0 Hz, 1H, H<sub>b</sub>-5), 3.48-3.32 (m, 1H, -CHH<sub>d</sub>-I), 3.54 (dd,  $J$  =10.2, 3.0 Hz, 1H, -CHH<sub>c</sub>-I), 4.92-4.81 (m, 1H, H-4), 6.93 (td,  $J$  =7.5, 1.0 Hz, 1H, H-7), 7.07-7.00 (m, 1H, H-4'), 7.14 (t,  $J$  =8.1 Hz, 1H, H-8), 7.23 (d,  $J$  =7.2 Hz, 1H, H-6), 7.34-7.26 (m, 2H, H-3', H-5'), 7.52 (dd,  $J$  =8.7, 0.9 Hz, 2H, H-2', H-6'), 7.74 (d,  $J$  =8.1 Hz, 1H, H-9), 8.85 (s, 1H, -NH);  $^{13}\text{C}$  NMR (75 MHz, DMSO- $d_6$ )  $\delta$  11.8 (-CH<sub>2</sub>-I), 34.6 (C-5), 57.9 (C-4), 114.7 (C-9), 120.6 (2C, C-2', C-6'), 122.1 (C-7),

122.7 (C-4'), 124.8 (C-6), 127.1 (C-8), 128.4 (2C, C-3', C-5'), 129.0 (C-5a), 139.3 (C-1'), 143.0 (C-9a), 152.0 (C-2). HRMS (ESI, m/z) calcd for C<sub>16</sub>H<sub>16</sub>IN<sub>2</sub>O [M + H]<sup>+</sup>: 379.0307; found: 379.0307.

**7-chloro-4-(iodomethyl)-N-phenyl-4,5-dihydrobenzo[d][1,3]oxazepin-2-amine (5b):** Isolated as a white solid (mp 148-149 °C); obtained 0.23 g (56%); IR (KBr)  $\nu_{\max}$  3354, 1660, 1529, 1329, 1236, 814, 744, 580 cm<sup>-1</sup>; <sup>1</sup>H NMR (400 MHz, CDCl<sub>3</sub>)  $\delta$  2.98 (d, *J* = 16.8 Hz, 1H, H<sub>a</sub>-5), 3.42-3.24 (m, 2H, -CHH<sub>d</sub>-I, H<sub>b</sub>-5), 3.59 (dd, *J* = 9.6, 2.8 Hz, 1H, -CHH<sub>c</sub>-I), 4.72-4.61 (m, 1H, H-4), 7.11 (t, *J* = 8.0 Hz, 1H, H-4'), 7.23-7.16 (m, 2H, H-3', H-5'), 7.44-7.27 (m, 5H, H-6, H-8, H-9, H-2', H-6'); <sup>13</sup>C NMR (100 MHz, CDCl<sub>3</sub>)  $\delta$  9.3 (-CH<sub>2</sub>-I), 34.5 (C-5), 61.1 (C-4), 114.8 (C-9), 120.2 (2C, C-2', C-6'), 124.0 (C-4'), 126.1 (C-6), 127.8 (C-8), 128.2 (C-5a), 129.1 (2C, C-3', C-5'), 132.0 (C-7), 137.6 (C-1'), 140.4 (C-9a), 151.7 (C-2). HRMS (ESI, m/z) calcd for C<sub>16</sub>H<sub>15</sub>ClIN<sub>2</sub>O [M + H]<sup>+</sup>: 412.9918; found: 412.9918.

**7-fluoro-4-(iodomethyl)-N-phenyl-4,5-dihydrobenzo[d][1,3]oxazepin-2-amine (5c):** Isolated as a white solid (mp 139-140 °C); obtained 0.15 g (38%); IR (KBr)  $\nu_{\max}$  3313, 1645, 1481, 1320, 744, 592 cm<sup>-1</sup>; <sup>1</sup>H NMR (400 MHz, CDCl<sub>3</sub>)  $\delta$  2.99 (d, *J* = 16.8 Hz, 1H, H<sub>a</sub>-5), 3.33-3.23 (m, 1H, -CHH<sub>d</sub>-I), 3.37 (dd, *J* = 16.8, 9.6 Hz, 1H, H<sub>b</sub>-5), 3.63-3.55 (m, 1H, -CHH<sub>c</sub>-I), 4.69 (br s, 1H, H-4), 7.01-6.83 (m, 3H, H-3', H-4', H-5'), 7.15-7.06 (m, 1H, H-6), 7.44-7.29 (m, 4H, H-8, H-9, H-2', H-6'); <sup>13</sup>C NMR (100 MHz, CDCl<sub>3</sub>)  $\delta$  9.4 (-CH<sub>2</sub>-I), 34.7 (C-5), 61.2 (C-4), 113.3 (d, *J* = 24.0 Hz, C-8), 114.1 (d, *J* = 23.2 Hz, C-6), 114.6 (d, *J* = 8.5 Hz, C-9), 120.1 (2C, C-2', C-6'), 123.9 (C-4'), 129.1 (2C, C-3', C-5'), 132.2 (d, *J* = 8.5 Hz, C-5a), 137.7 (C-1'), 151.8 (C-2), 159.0 (d, *J* = 240.8 Hz, C-7). HRMS (ESI, m/z) calcd for C<sub>16</sub>H<sub>15</sub>FIN<sub>2</sub>O [M + H]<sup>+</sup>: 397.0213; found: 397.0213.

## 2.4 Antiproliferative Activity

HL-60 (human pro-myelocytic leukemia), NCI-H292 (human lung carcinoma), HEP-2 (human larynx carcinoma) and HT29 (human colon carcinoma) were obtained from Rio de Janeiro Cell Bank (RJ-Brazil). All cancer cells were maintained in RPMI 1640 medium supplemented with 10% fetal bovine serum, 2mM glutamine, 100 U/mL penicillin, 100 $\mu$ g/mL streptomycin at 37°C with 5% CO<sub>2</sub>. The cytotoxicity of all compounds was tested using the 3-(4,5-dimethyl-2-thiazolyl)-2,5-diphenyl-2*H*-tetrazolium bromide (MTT) (Sigma Aldrich Co., St. Louis, MO/USA) reduction assay. For all experiments, tumor cells were plated in 96-well plates (10<sup>5</sup> cells/mL for adherent cells or 3 $\times$ 10<sup>5</sup> cells/mL for leukemias). Tested Compounds (0.1–25  $\mu$ g/mL) dissolved in DMSO 1% were added to each well and incubated for 72 h. Control groups received the same amount of DMSO. After 69h of treatment 25  $\mu$ L of MTT (5mg/mL) was added, three hours later, the MTT formazan product was dissolved in 100  $\mu$ L of DMSO, and absorbance was measured at 595 nm in plate spectrophotometer. The IC<sub>50</sub> values and their 95% confidence intervals for two different experiments were obtained by nonlinear regression using GraphPad Prism version 5.0 for Windows (GraphPad Software, San Diego, California USA)



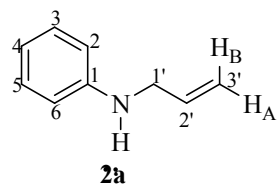

|      | <sup>13</sup> C | <sup>1</sup> H                                                                                                     |
|------|-----------------|--------------------------------------------------------------------------------------------------------------------|
| 1    | 147.9           | -                                                                                                                  |
| 2, 6 | 112.9           | 6.70 (dd; <i>J</i> = 8.2; 1.0 Hz)                                                                                  |
| 3,5  | 129.1           | 7.23-7.17 (m)                                                                                                      |
| 4    | 117.4           | 6.79 (t; <i>J</i> = 7.5 Hz)                                                                                        |
| 1'   | 46.4            | 3.83(dt; <i>J</i> = 5.4; 1.5 Hz)                                                                                   |
| 2'   | 135.3           | 6.09-5.96 (m)                                                                                                      |
| 3'   | 116.1           | <i>H<sub>B</sub></i> 5.36 (dq; <i>J</i> = 16.8; 1.5 Hz)<br><i>H<sub>A</sub></i> 5.24 (dq; <i>J</i> = 10.5; 1.5 Hz) |
| -NH  |                 | 3.79 (br s)                                                                                                        |

2a.esp

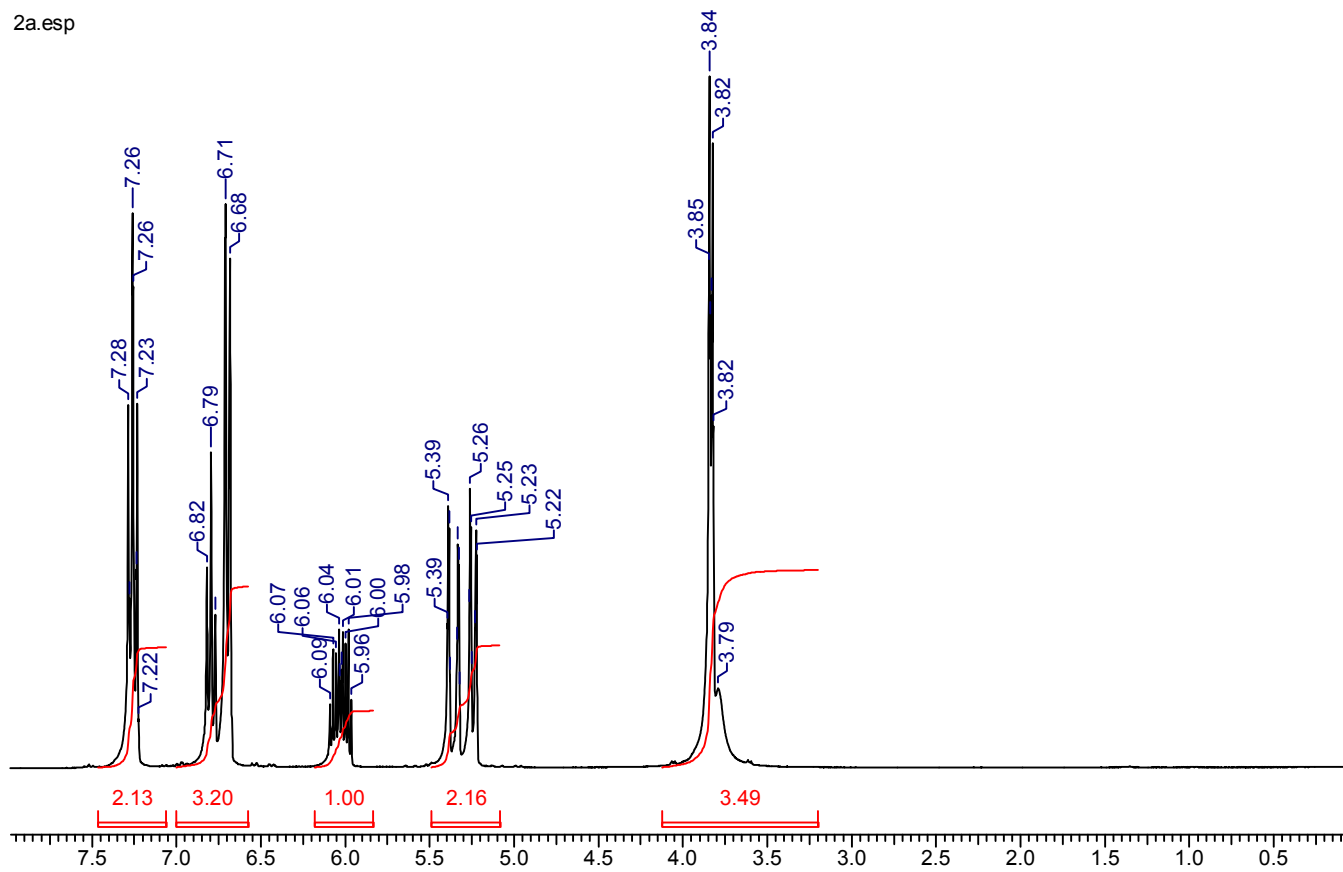

<sup>1</sup>H NMR spectrum (300 MHz, CDCl<sub>3</sub>) of compound **2a**.

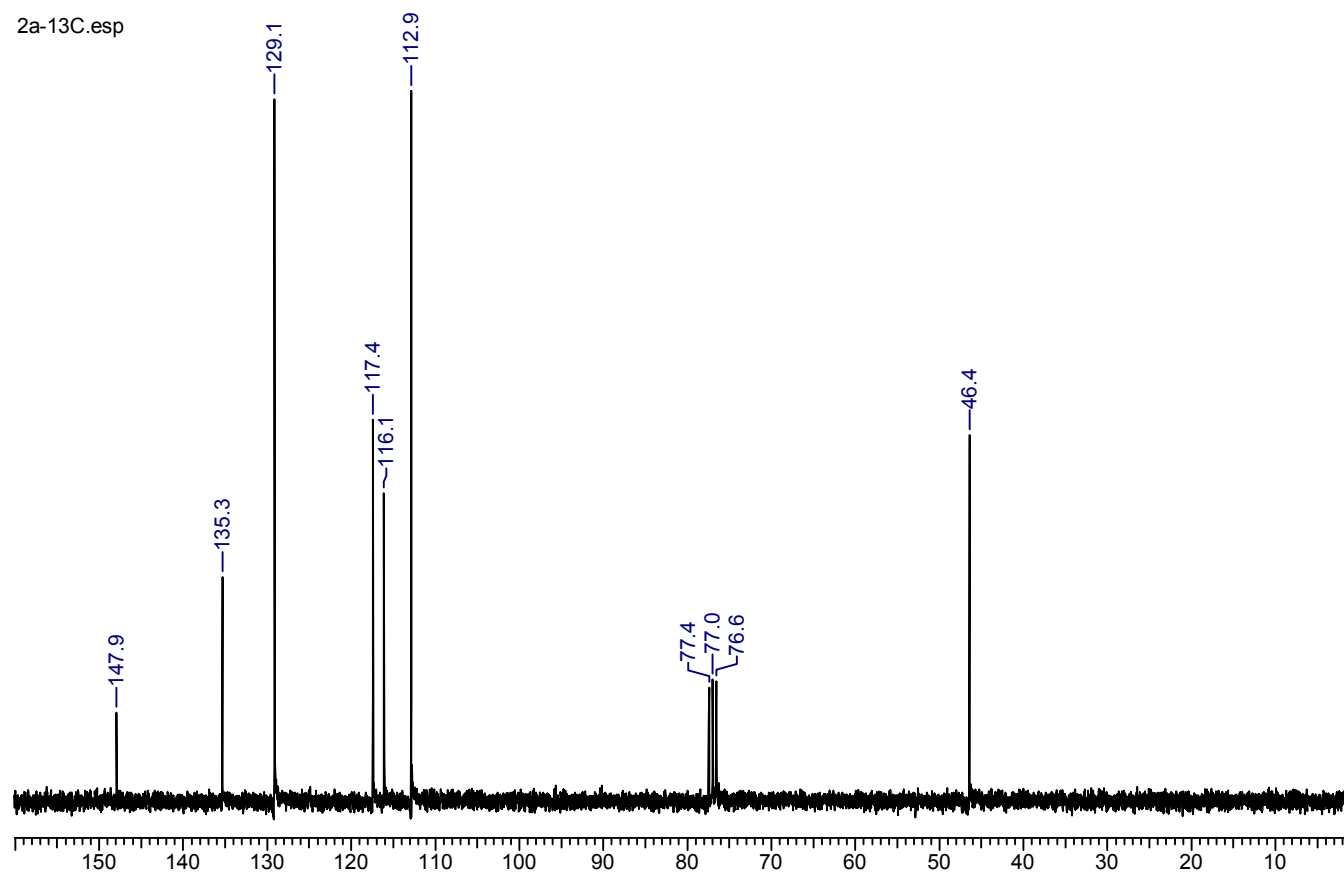

$^{13}\text{C}$  NMR spectrum (75 MHz,  $\text{CDCl}_3$ ) of compound **2a**.

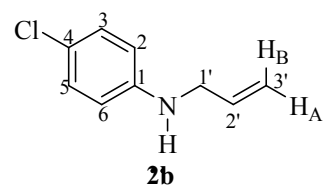

|      | <sup>13</sup> C | <sup>1</sup> H                                                                                                     |
|------|-----------------|--------------------------------------------------------------------------------------------------------------------|
| 1    | 146.2           | -                                                                                                                  |
| 2, 6 | 114.2           | 6.57(d; <i>J</i> = 9.0 Hz)                                                                                         |
| 3,5  | 129.0           | 7.14 (d; <i>J</i> = 9.0 Hz)                                                                                        |
| 4    | 122.3           | -                                                                                                                  |
| 1'   | 46.7            | 3.76 (dt; <i>J</i> = 5.4; 1.5 Hz)                                                                                  |
| 2'   | 134.7           | 6.01-5.88 (m)                                                                                                      |
| 3'   | 116.6           | <i>H<sub>B</sub></i> 5.29 (dq; <i>J</i> = 17.4; 1.5 Hz)<br><i>H<sub>A</sub></i> 5.20 (dq; <i>J</i> = 10.2; 1.5 Hz) |

2b.esp

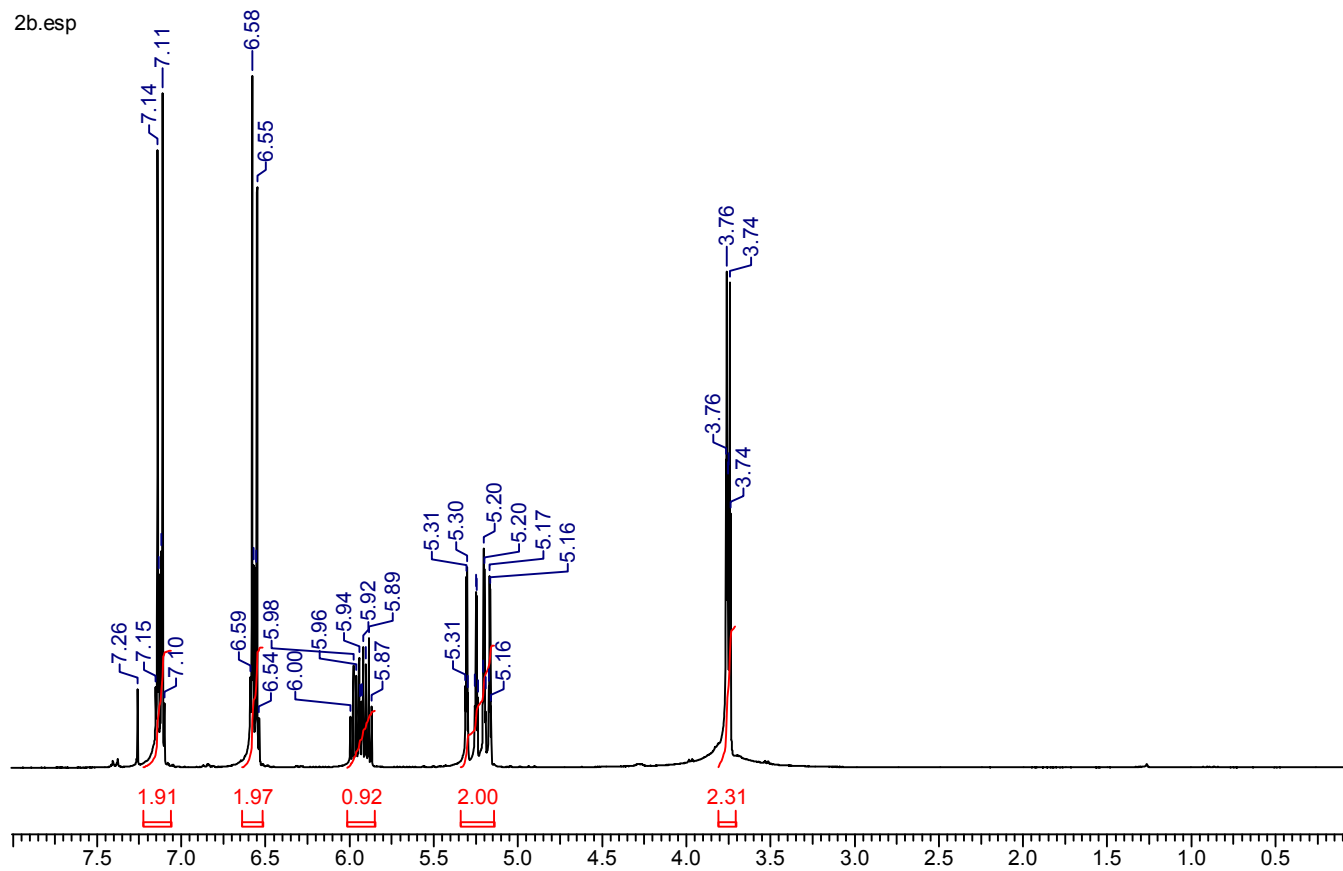

$^1\text{H}$  NMR spectrum (300 MHz,  $\text{CDCl}_3$ ) of compound **2b**.

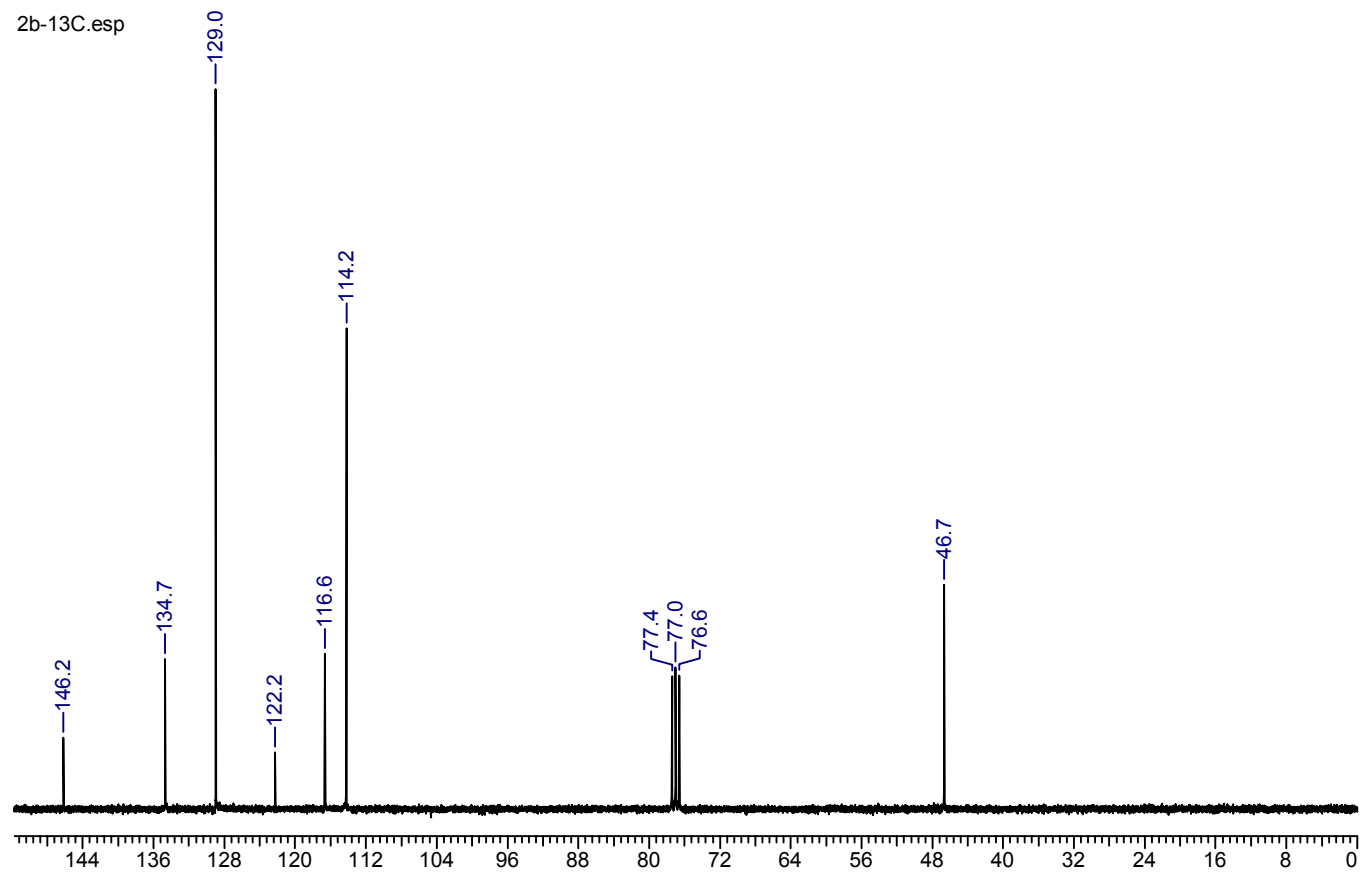

$^{13}\text{C}$  NMR spectrum (75MHz,  $\text{CDCl}_3$ ) of compound **2b**.

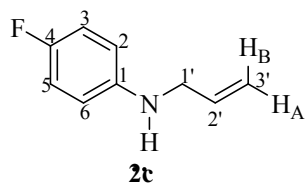

|      | <sup>13</sup> C                |                | <sup>1</sup> H                     |
|------|--------------------------------|----------------|------------------------------------|
| 1    | 144.4                          |                | -                                  |
| 2, 6 | 113.7 (d, <i>J</i> = 6.9 Hz),  |                | 6.72-6.50 (m)                      |
| 3, 5 | 115.5 (d, <i>J</i> = 22.5 Hz)  |                | 7.09-6.83 (m)                      |
| 4    | 155.8 (d, <i>J</i> = 233.9 Hz) |                | -                                  |
| 1'   | 47.1                           |                | 3.74 (d; <i>J</i> = 5.2 Hz)        |
| 2'   | 135.3                          |                | 6.10-5.88 (m)                      |
| 3'   | 116.2                          | H <sub>B</sub> | 5.30 (dd; <i>J</i> = 17.2; 1.6 Hz) |
|      |                                | H <sub>A</sub> | 5.19 (dd; <i>J</i> = 10.4; 1.6 Hz) |
| -NH  | -                              |                | 3.69 (br s)                        |

2c.esp

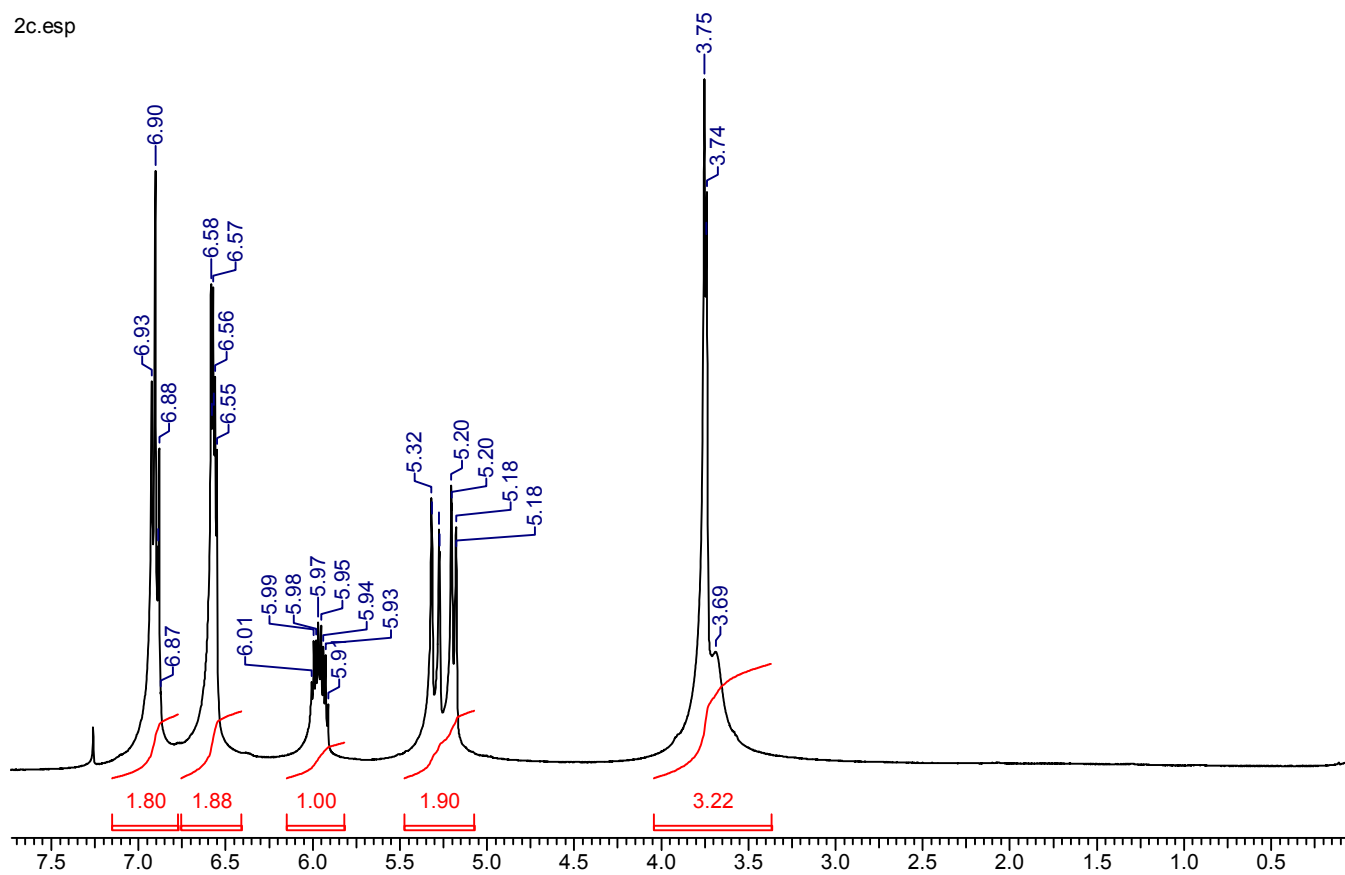

<sup>1</sup>H NMR spectrum (400 MHz, CDCl<sub>3</sub>) of compound **2c**.



2c-13C.esp

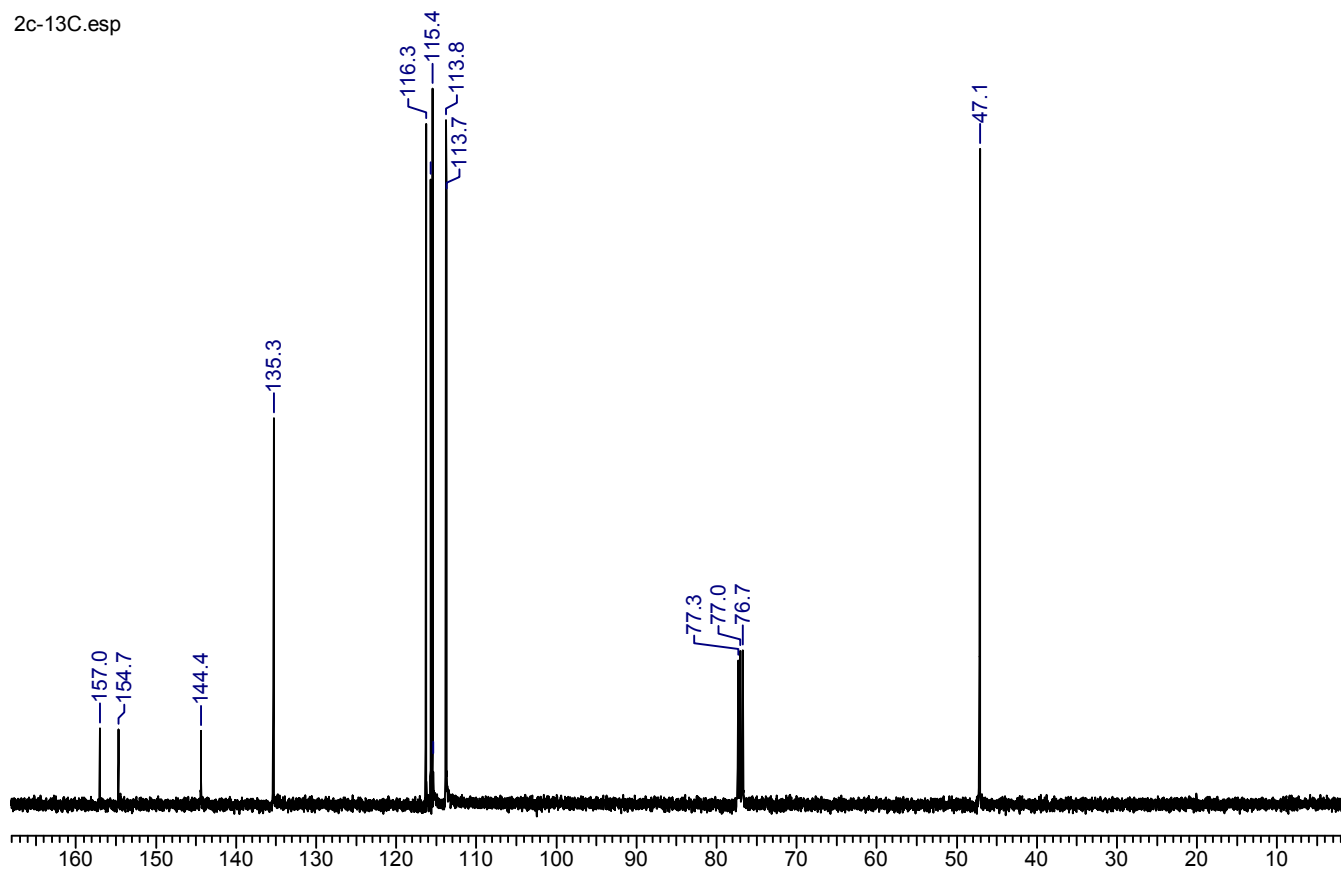

<sup>13</sup>C NMR spectrum (100 MHz, CDCl<sub>3</sub>) of compound **2c**.

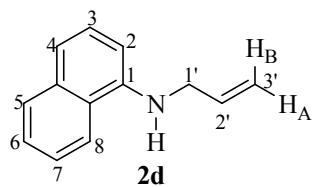

|    | <sup>13</sup> C      | <sup>1</sup> H                     |
|----|----------------------|------------------------------------|
| 1  | 142.9                | -                                  |
| 2  | 104.9                | 6.66 (d; <i>J</i> = 7.5 Hz)        |
| 3  | 126.5                | 7.38 (dd; <i>J</i> = 7.8; 7.5 Hz)  |
| 4  | 117.6                | 7.29 (d; <i>J</i> = 7.8 Hz)        |
| 4a | 134.2                | -                                  |
| 5  | 128.7                | 7.86-7.81 (m)                      |
| 8  | 119.8                |                                    |
| 8a | 123.4                | -                                  |
| 6  | 125.7                | 7.51-7.44 (m)                      |
| 7  | 124.7                |                                    |
| 1' | 46.8                 | 3.98 (dt; <i>J</i> =5.7; 1.5 Hz)   |
| 2' | 135.0                | 6.18-6.05 (m)                      |
| 3' | <i>H<sub>B</sub></i> | 5.40 (dd; <i>J</i> = 16.8; 1.8 Hz) |
|    | <i>H<sub>A</sub></i> | 5.27 (dd; <i>J</i> =10.5; 1.8 Hz)  |

2d.esp

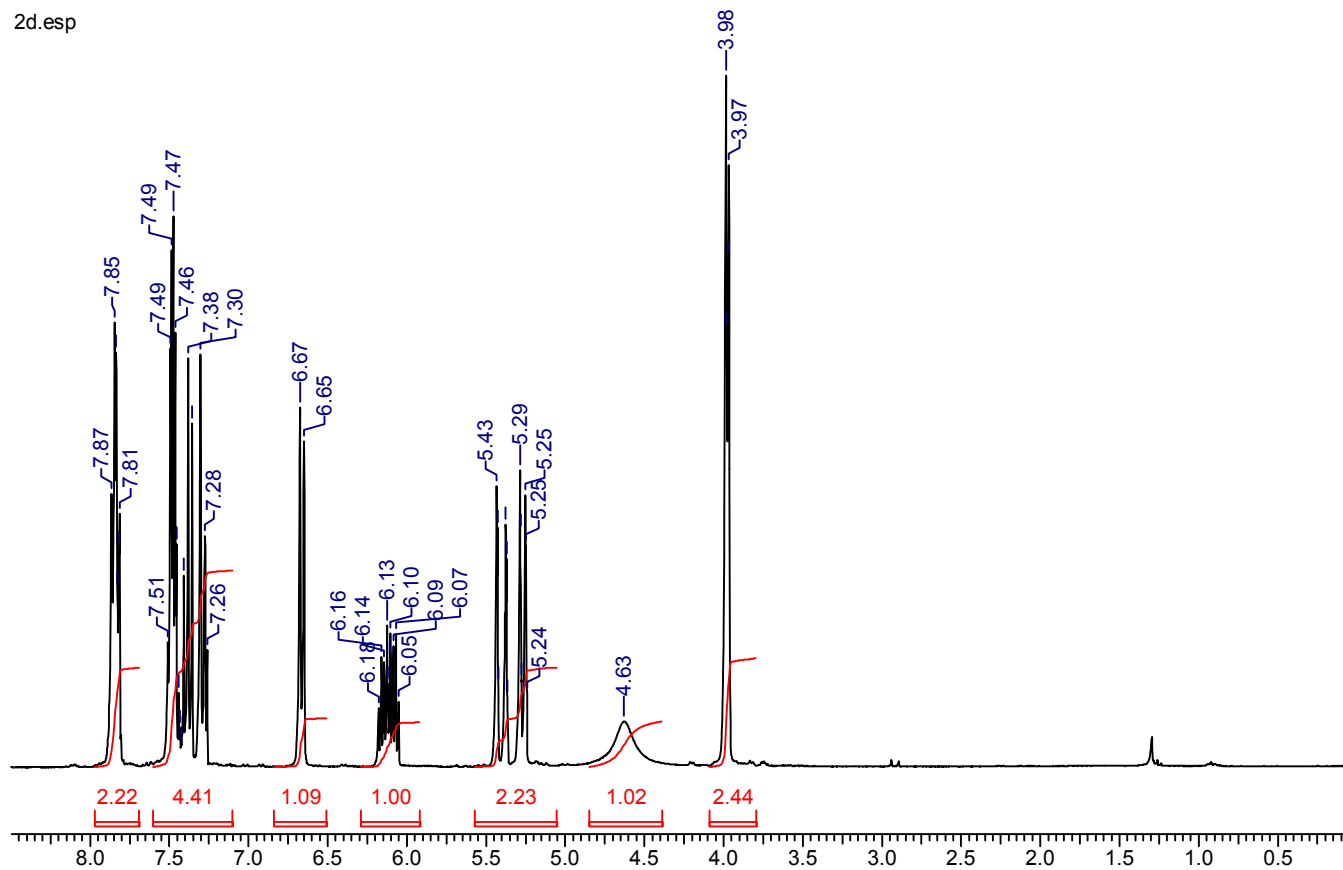

$^1\text{H}$  NMR spectrum (300 MHz,  $\text{CDCl}_3$ ) of compound **2d**.

2d-13C.esp

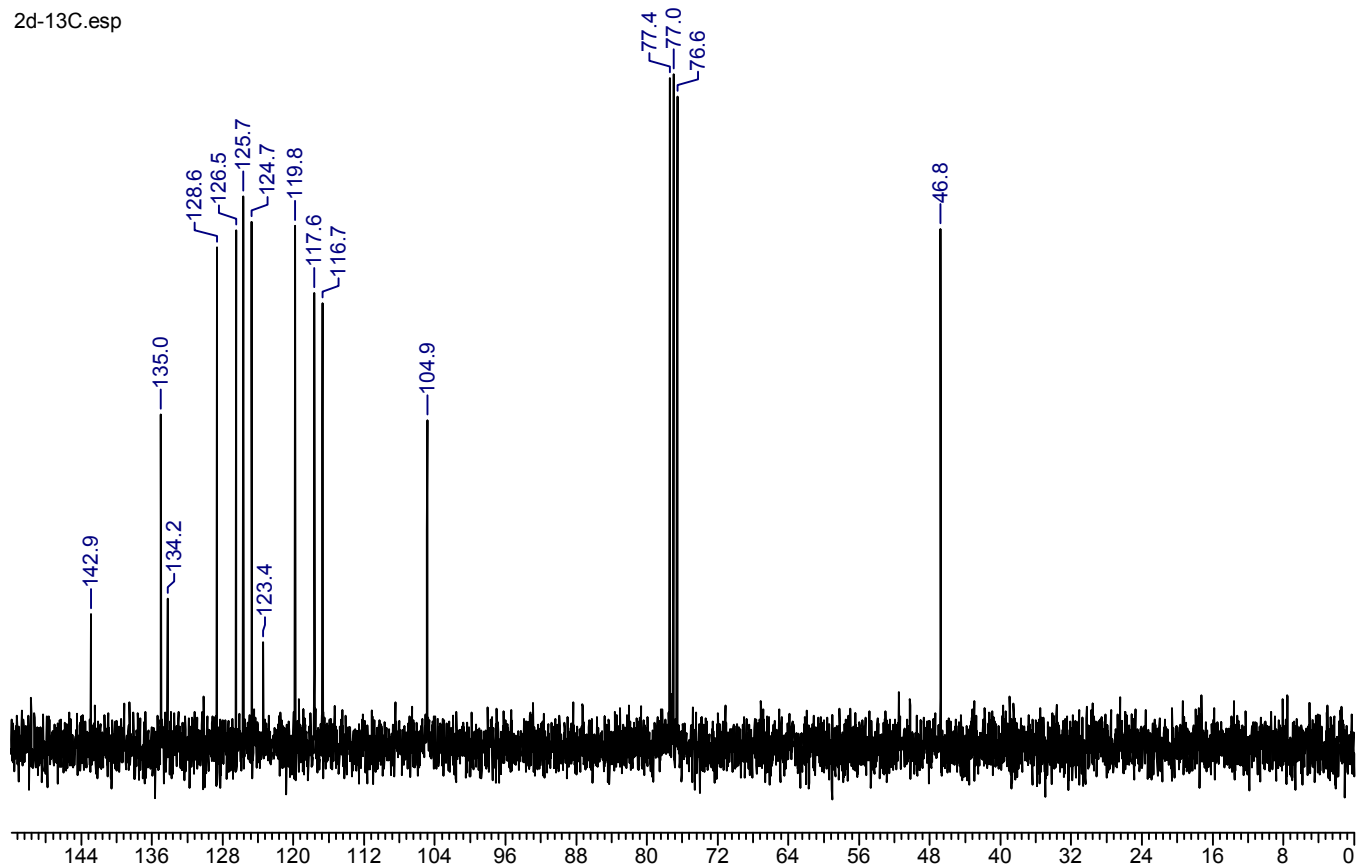

<sup>13</sup>C NMR spectrum (75 MHz, CDCl<sub>3</sub>) of compound **2d**.

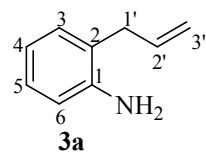

|                  | <sup>13</sup> C | <sup>1</sup> H              |
|------------------|-----------------|-----------------------------|
| 1                | 144.4           | -                           |
| 2                | 124.1           | -                           |
| 3                | 130.1           | 7.12-7.07 (m)               |
| 5                | 127.5           |                             |
| 4                | 119.0           | 6.79 (t; <i>J</i> = 7.0 Hz) |
| 6                | 115.9           | 6.72 (d; <i>J</i> = 7.5 Hz) |
| 1'               | 36.4            | 3.34 (d; <i>J</i> = 6.3 Hz) |
| 2'               | 135.8           | 6.05- 5.91 (m)              |
| 3'               | 116.1           | 5.18-5.10 (m)               |
| -NH <sub>2</sub> | -               | 3.71 (br s)                 |

3a.esp

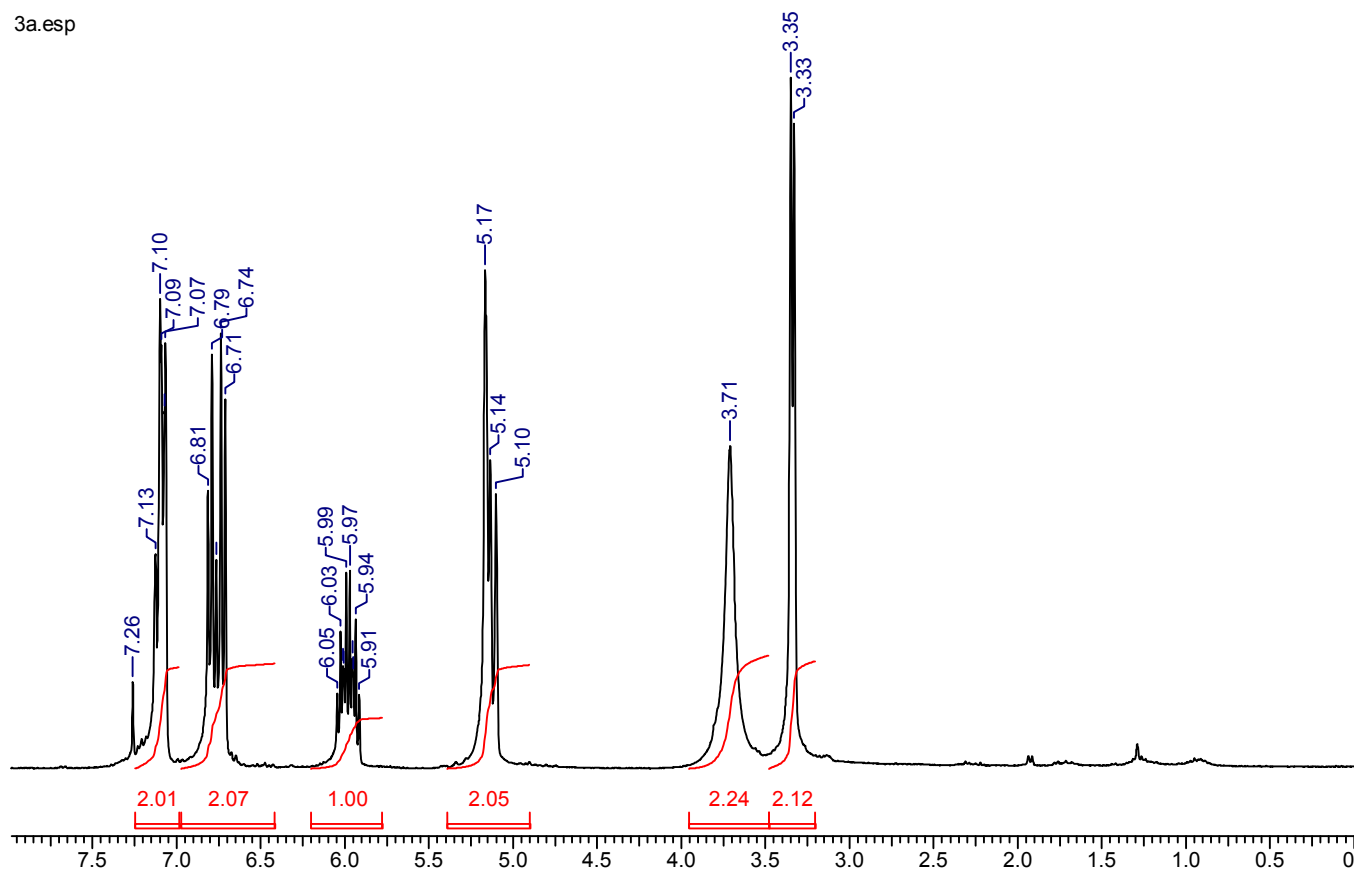

$^1\text{H}$  NMR spectrum (300 MHz,  $\text{CDCl}_3$ ) of compound **3a**.

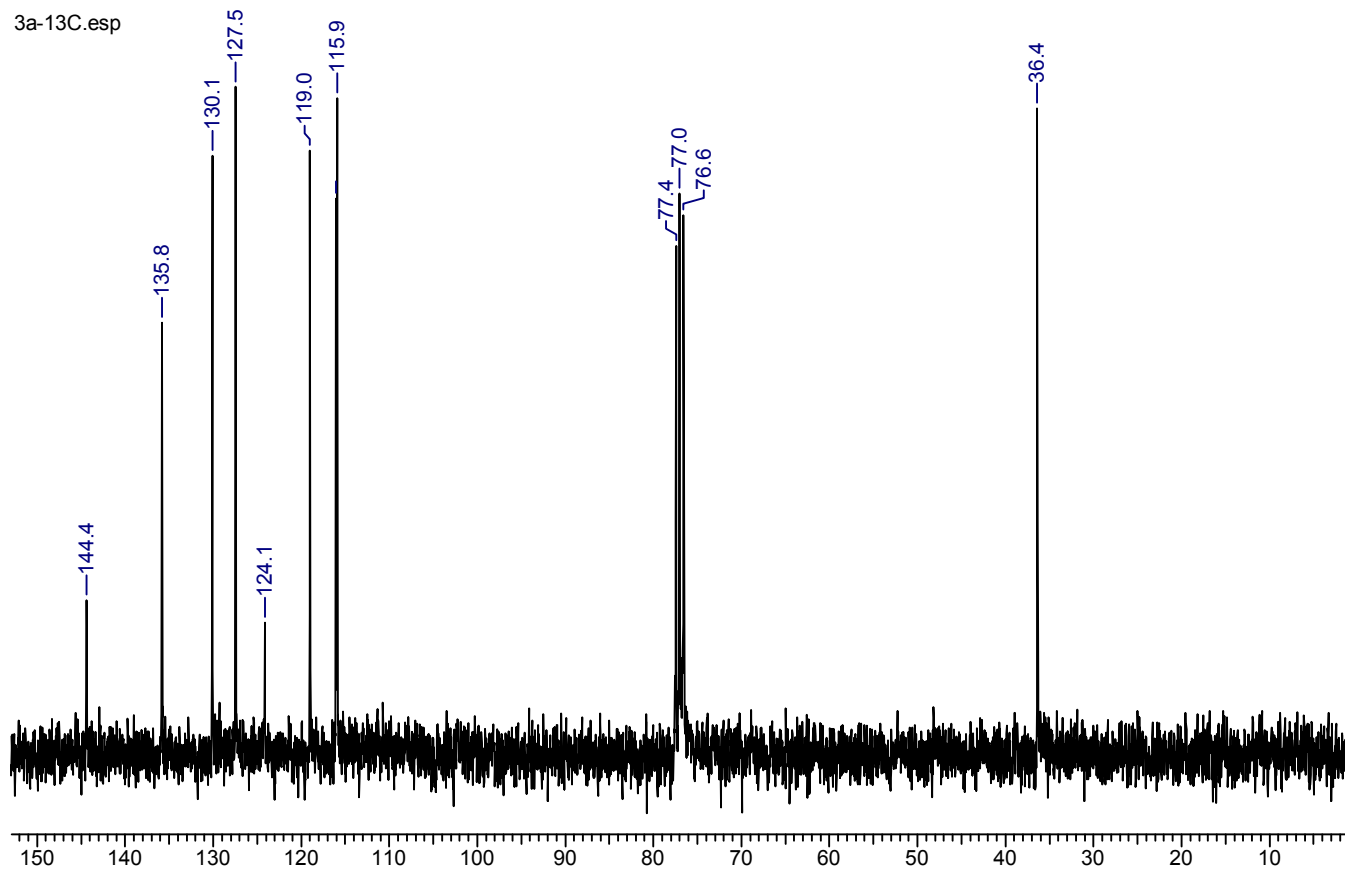

$^{13}\text{C}$  NMR spectrum (75 MHz,  $\text{CDCl}_3$ ) of compound **3a**.

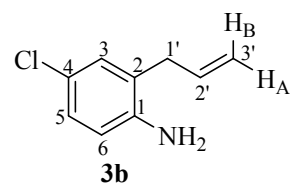

|                  | <sup>13</sup> C | <sup>1</sup> H                                                                             |
|------------------|-----------------|--------------------------------------------------------------------------------------------|
| 1                | 143.0           | -                                                                                          |
| 2                | 125.7           | -                                                                                          |
| 3                | 129.7           | 7.03-7.01 (m)                                                                              |
| 5                | 127.1           | -                                                                                          |
| 4                | 123.3           | -                                                                                          |
| 6                | 116.8           | 6.61 (dd; <i>J</i> = 6.4; 2.8 Hz)                                                          |
| 1'               | 36.2            | 3.26 (d; <i>J</i> = 6.0 Hz)                                                                |
| 2'               | 134.9           | 5.97-5.87 (m)                                                                              |
| 3'               | 116.7           | H <sub>B</sub> 5.11 (d; <i>J</i> = 17.2 Hz)<br>H <sub>A</sub> 5.16 (d; <i>J</i> = 10.0 Hz) |
| -NH <sub>2</sub> | -               | 3.67 (br s)                                                                                |



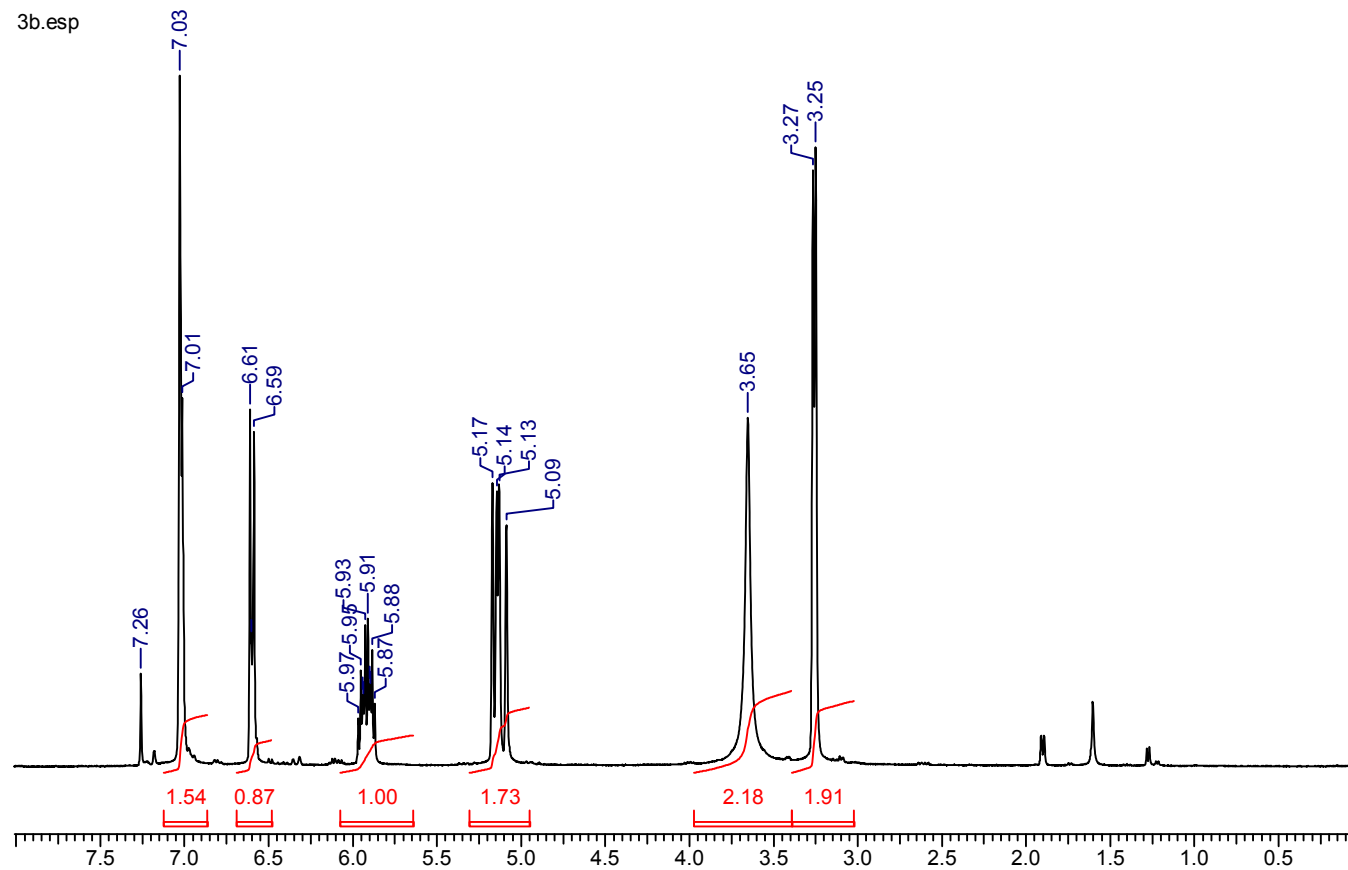

<sup>1</sup>H NMR spectrum (400 MHz, CDCl<sub>3</sub>) of compound **3b**.

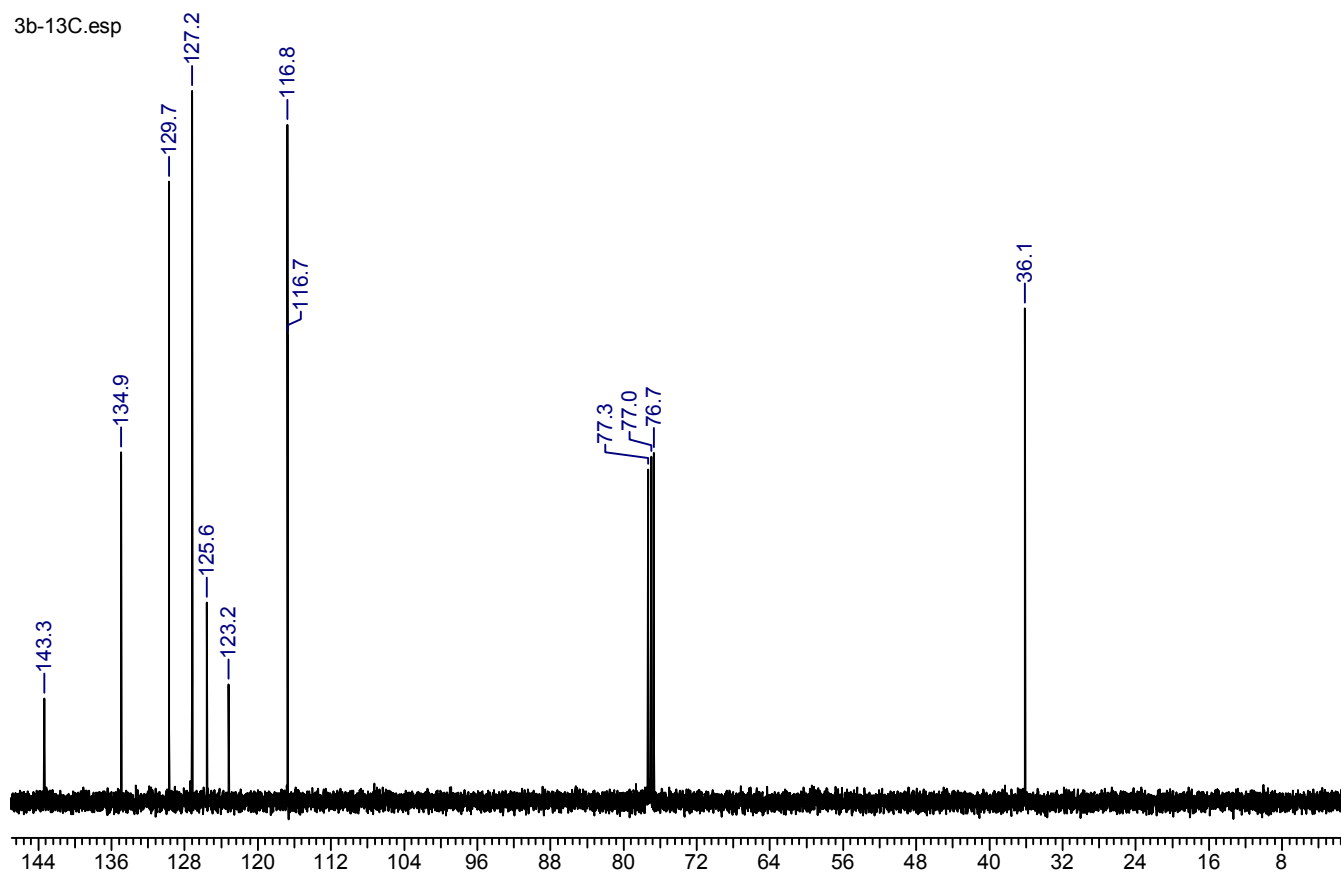

$^{13}\text{C}$  NMR spectrum (100 MHz,  $\text{CDCl}_3$ ) of compound **3b**.

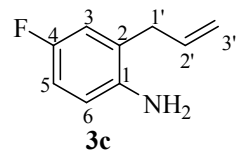

|                  | <sup>13</sup> C                | <sup>1</sup> H                       |
|------------------|--------------------------------|--------------------------------------|
| 1                | 140.5                          | -                                    |
| 2                | 125.6 (d, <i>J</i> = 6.8 Hz)   | -                                    |
| 3                | 116.3 (d, <i>J</i> = 20.1 Hz)  | 6.84-6.74 ( <i>m</i> )               |
| 5                | 113.5 (d, <i>J</i> = 21.8 Hz)  | -                                    |
| 4                | 156.3 (d, <i>J</i> = 234.6 Hz) | -                                    |
| 6                | 116.5 (d, <i>J</i> = 5.8 Hz)   | 6.65-6.59 ( <i>m</i> )               |
| 1'               | 36.1                           | 3.27 ( <i>d</i> ; <i>J</i> = 6.0 Hz) |
| 2'               | 134.9                          | 6.00-5.90 ( <i>m</i> )               |
| 3'               | 116.6                          | 5.20-5.07 ( <i>m</i> )               |
| -NH <sub>2</sub> | -----                          | 3.54 ( <i>br s</i> )                 |

3c.esp

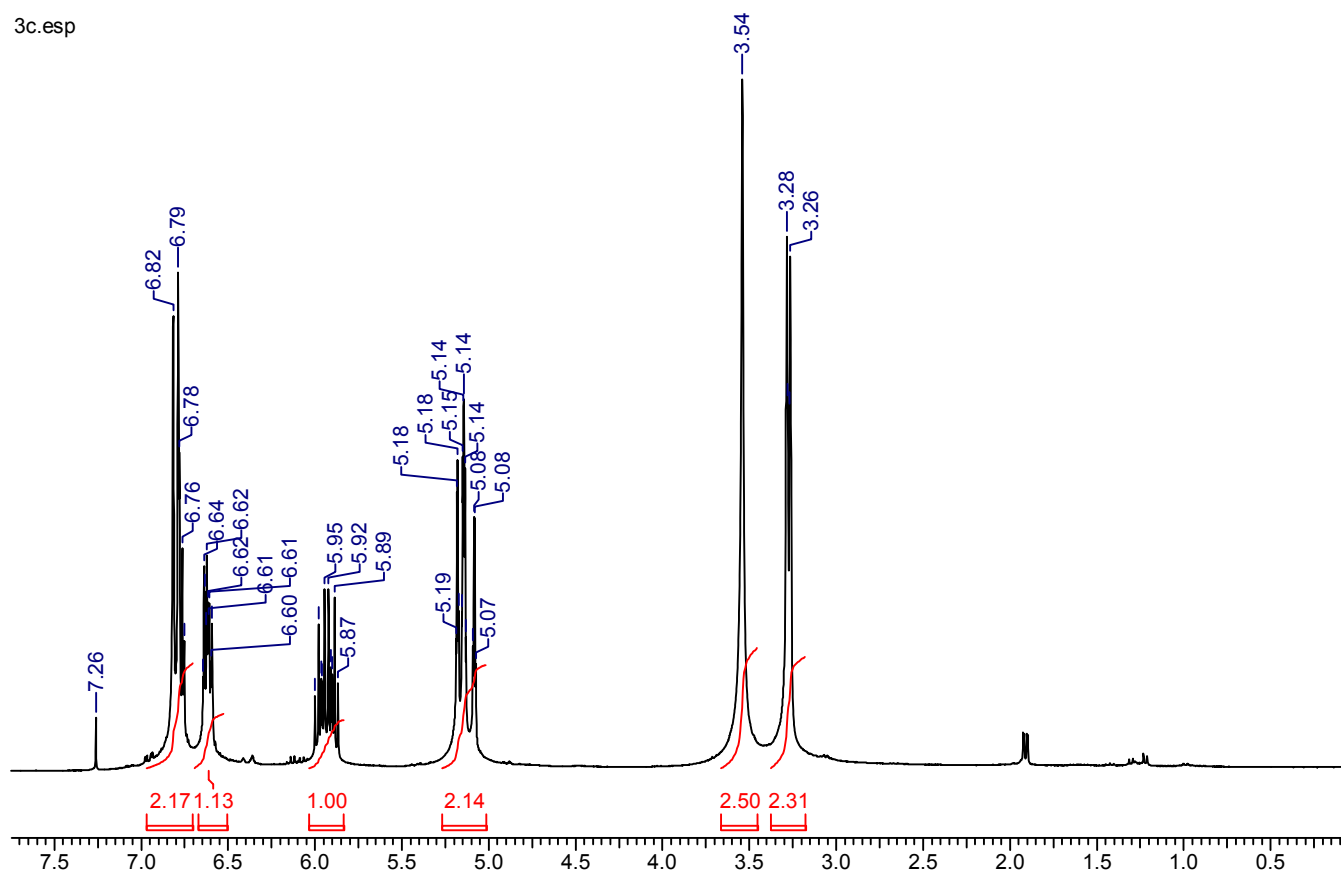

<sup>1</sup>H NMR spectrum (300 MHz, CDCl<sub>3</sub>) of compound **3c**.

3c-13C.esp

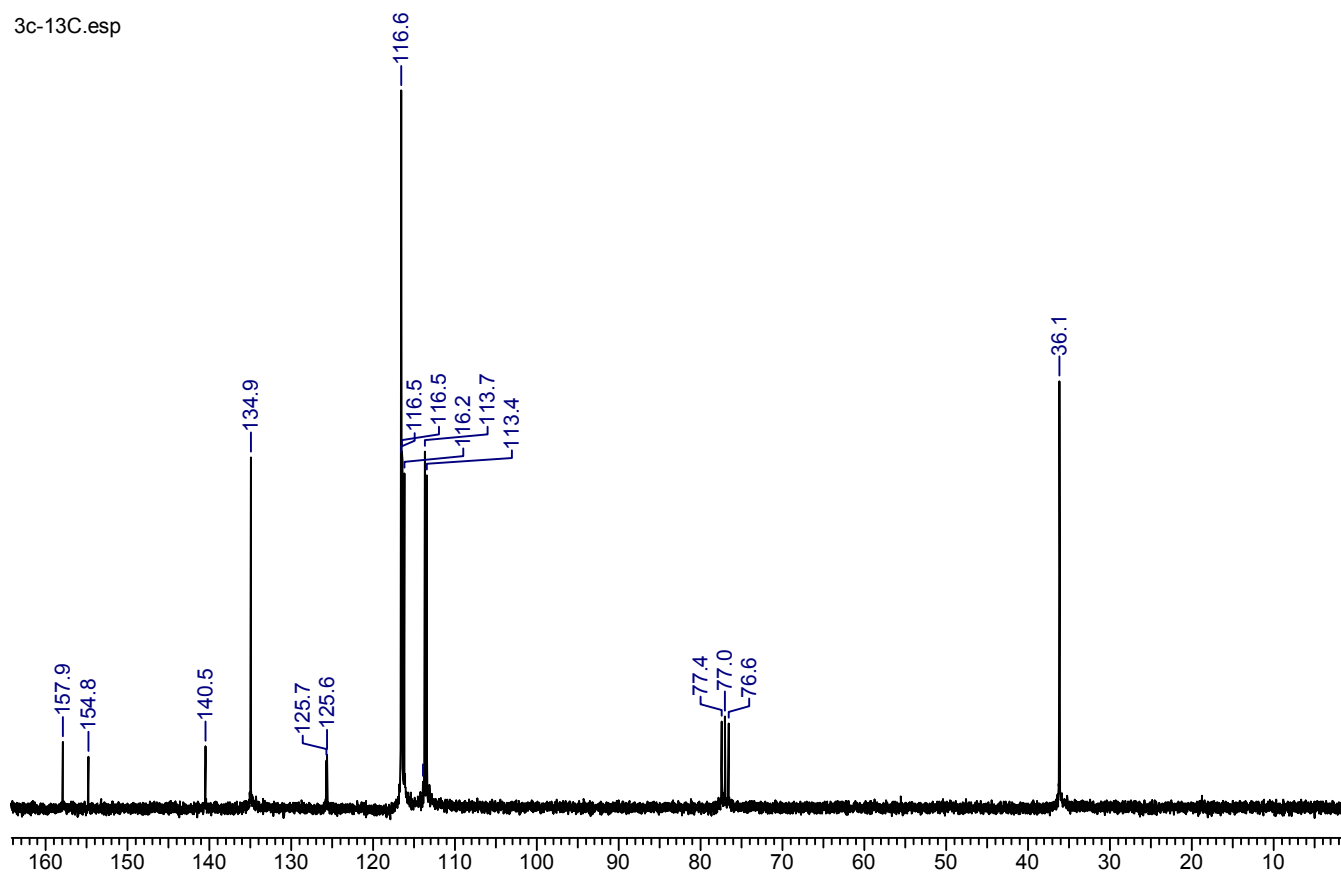

<sup>13</sup>C NMR spectrum (75 MHz, CDCl<sub>3</sub>) of compound 3c.

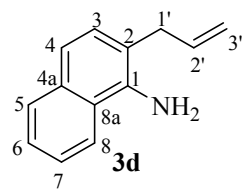

|                  | <sup>13</sup> C | <sup>1</sup> H                       |
|------------------|-----------------|--------------------------------------|
| 1                | 139.4           | -                                    |
| 2                | 117.6           |                                      |
| 3                | 128.3           | 7.40 ( <i>d</i> ; <i>J</i> = 8.4 Hz) |
| 4                | 118.3           | 7.31 ( <i>d</i> ; <i>J</i> =8.1 Hz)  |
| 4a               | 133.2           | -                                    |
| 5                | 128.7           | 7.91-7.84 ( <i>m</i> )               |
| 8                | 120.2           |                                      |
| 8a               | 123.5           | -                                    |
| 6                | 125.0           | 7.56-7.49 ( <i>m</i> )               |
| 7                | 124.7           |                                      |
| 1'               | 36.7            | 3.56 ( <i>d</i> ; <i>J</i> = 6.3 Hz) |
| 2'               | 135.5           | 5.96- 5.86 ( <i>m</i> )              |
| 3'               | 115.9           | 5.30-5.17 ( <i>m</i> )               |
| -NH <sub>2</sub> | -               | 4.17 ( <i>br s</i> )                 |

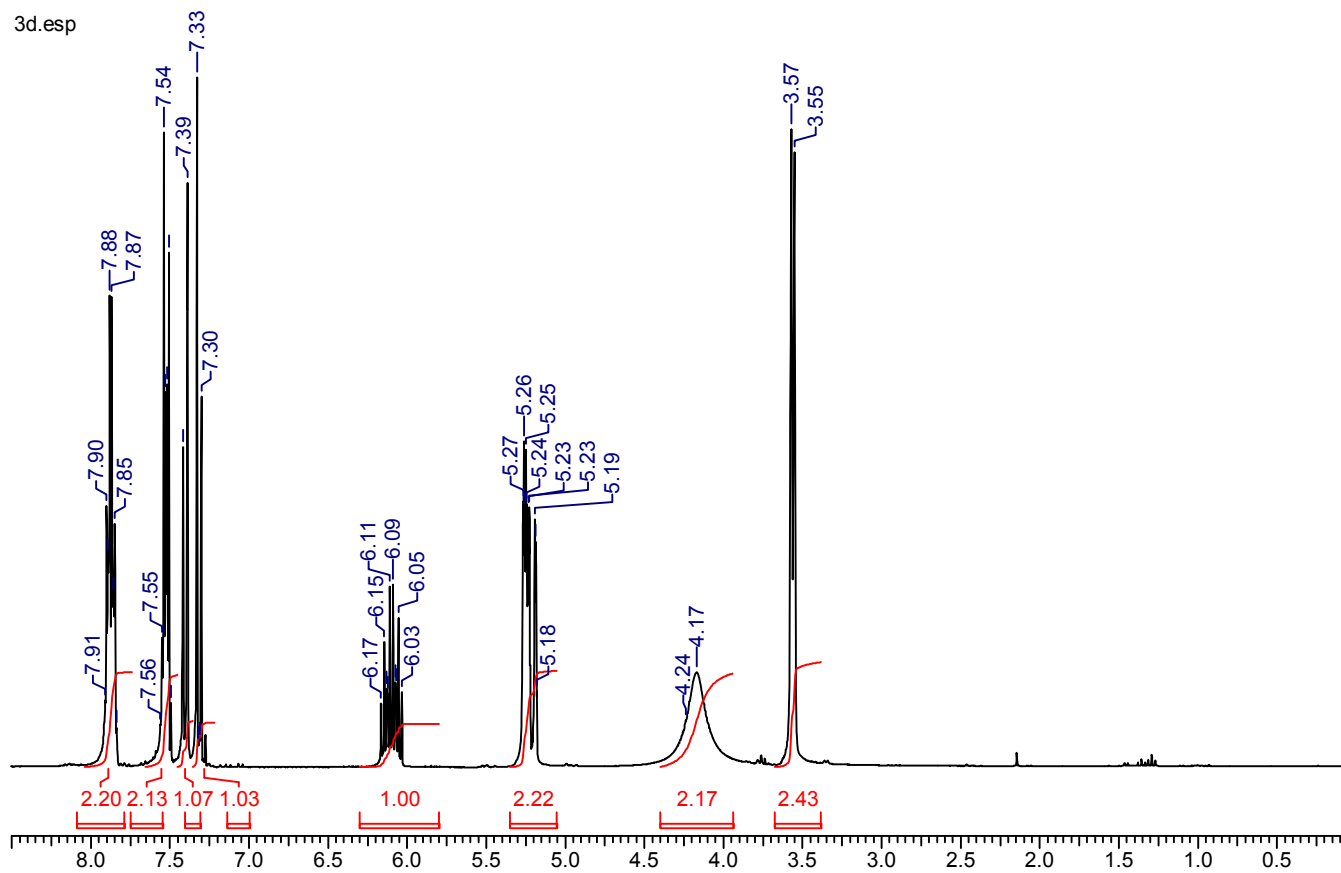

<sup>1</sup>H NMR spectrum (300 MHz, CDCl<sub>3</sub>) of compound **3d**.

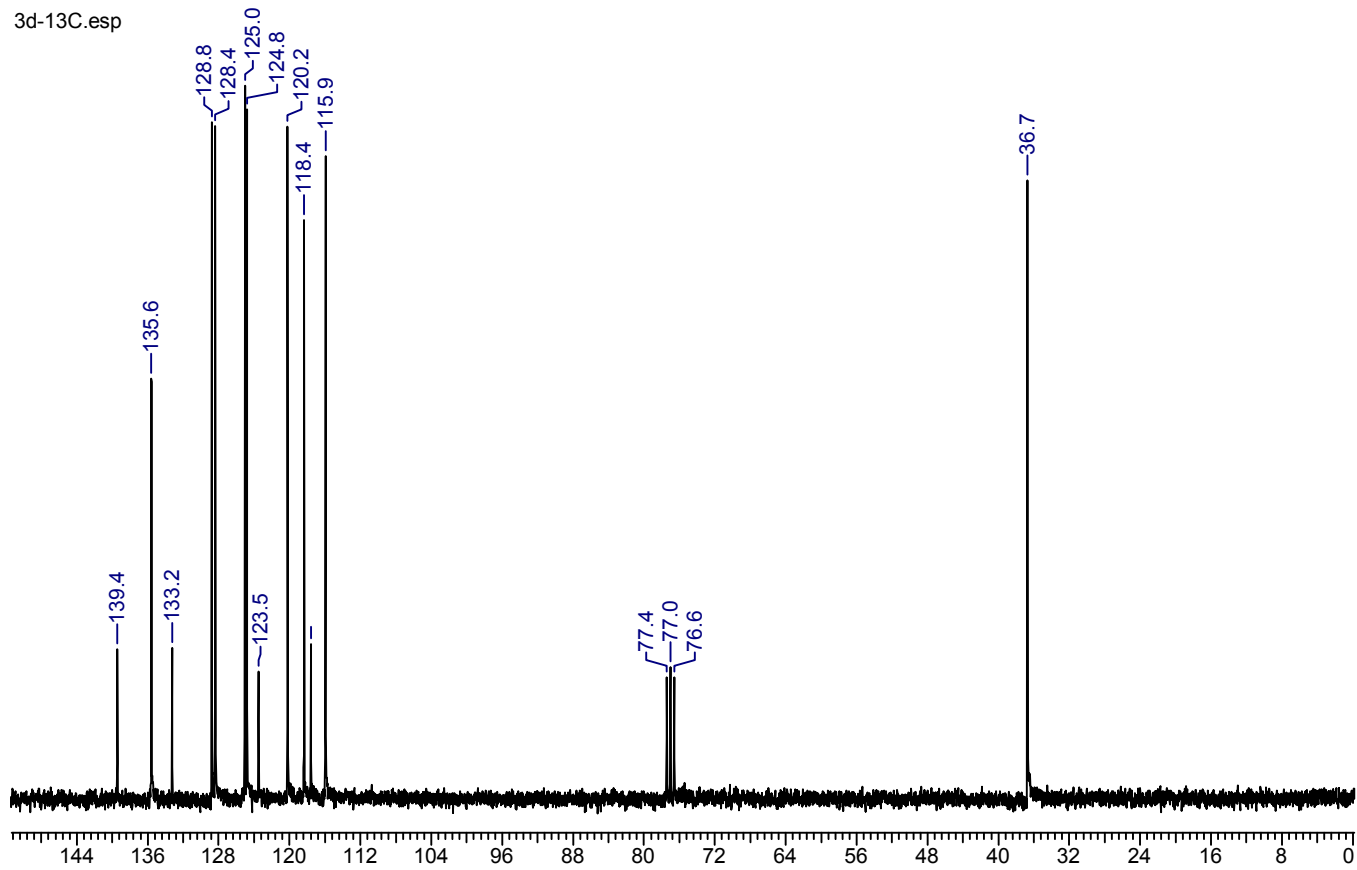

$^{13}\text{C}$  NMR spectrum (75 MHz,  $\text{CDCl}_3$ ) of compound **3d**.



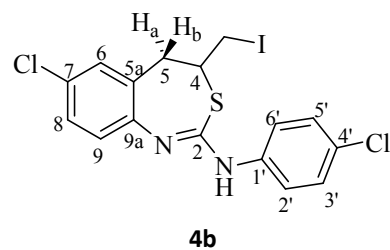

|                     | <sup>13</sup> C | <sup>1</sup> H                                                                                                     |
|---------------------|-----------------|--------------------------------------------------------------------------------------------------------------------|
| 2                   | -               | -                                                                                                                  |
| 4                   | 56.5            | 4.24-3.97 (m)                                                                                                      |
| 5                   | 37.4            | <i>H<sub>b</sub></i> 2.69 (dd; <i>J</i> = 13.2; 9.9 Hz)<br><i>H<sub>a</sub></i> 3.14 (dd; <i>J</i> = 13.2; 4.8 Hz) |
| 5a                  | 129, 2          | -                                                                                                                  |
| 6                   | 129.1           | 7.31 (d; <i>J</i> = 2.1 Hz)                                                                                        |
| 7                   | 131.1           |                                                                                                                    |
| 8                   | 128.3           | 7.26 (dd; <i>J</i> = 8.4; 2.1 Hz)                                                                                  |
| 9                   | 121.6           | 6.89 (d; <i>J</i> = 8.4 Hz)                                                                                        |
| 9a                  | 141.0           | -                                                                                                                  |
| 1'                  | 137.6           | -                                                                                                                  |
| 2', 6'              | 125.1           | 7.34 (d; <i>J</i> = 9.0 Hz)                                                                                        |
| 3', 5'              | 129.0           | 7.91 (d; <i>J</i> = 9.0 Hz)                                                                                        |
| 4'                  | 129.8           | -                                                                                                                  |
| -CH <sub>2</sub> -I | 10.8            | 3.58 (d; <i>J</i> = 6.6 Hz)                                                                                        |
| -NH                 | -               | 9.81 (s)                                                                                                           |

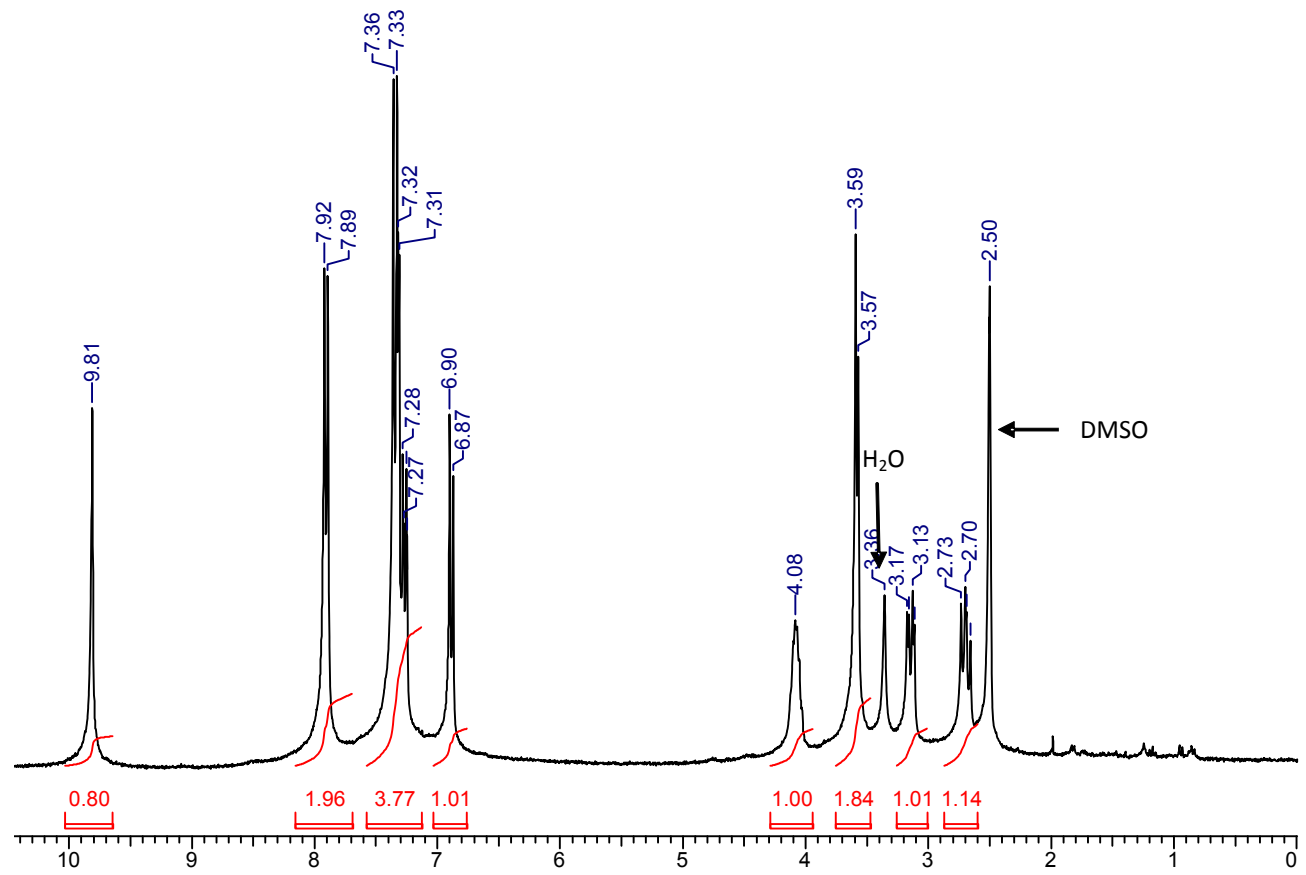

$^1\text{H}$  NMR spectrum (300 MHz,  $\text{DMSO-d}_6$ ) of compound **4b**.

-13C.esp

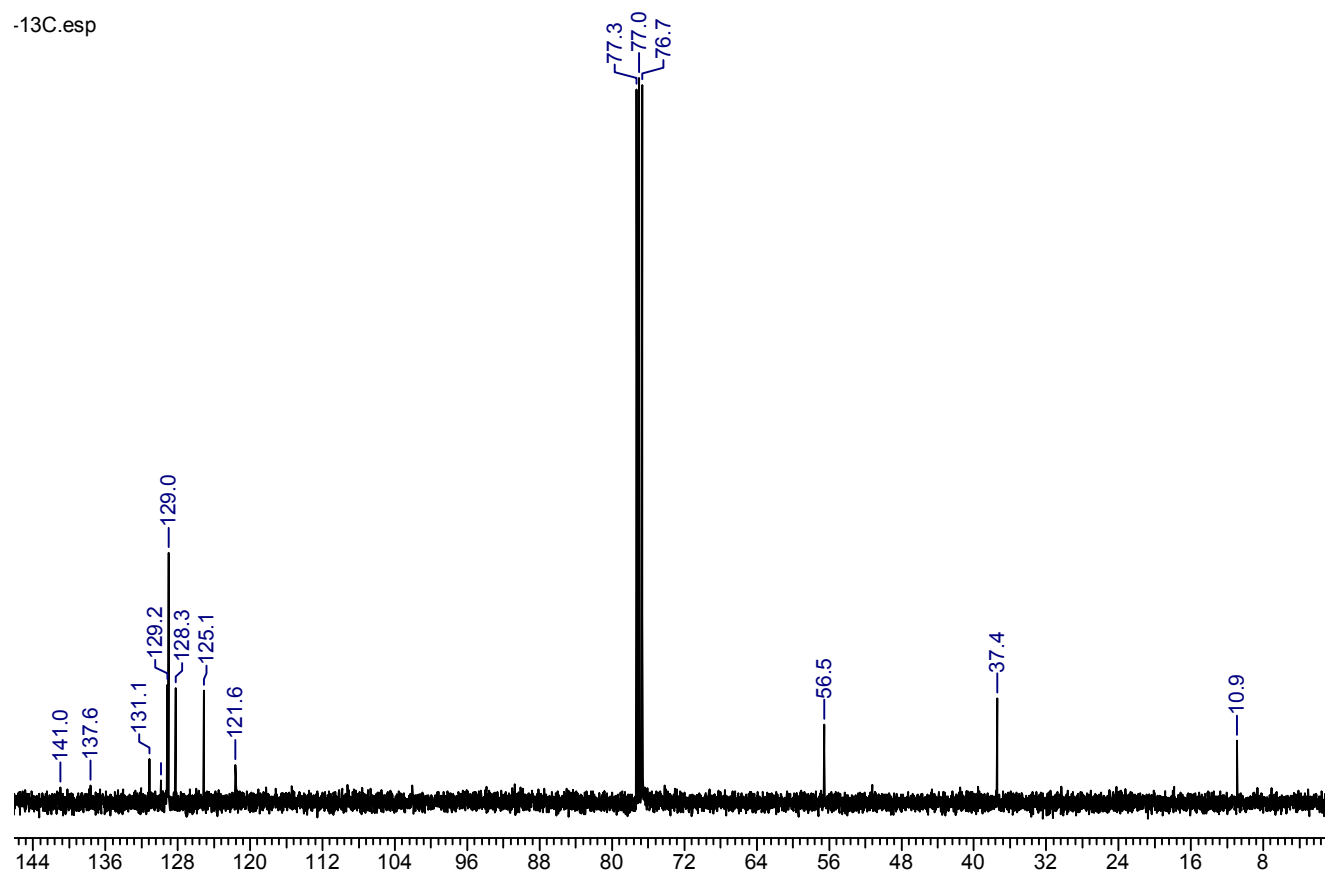

$^{13}\text{C}$  NMR spectrum (100 MHz,  $\text{CDCl}_3$ ) of compound **4b**.

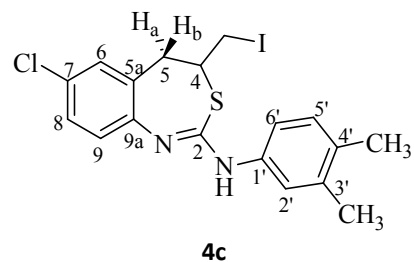

|                     | <sup>13</sup> C | <sup>1</sup> H                                                                                                      |
|---------------------|-----------------|---------------------------------------------------------------------------------------------------------------------|
| 2                   | -               | -                                                                                                                   |
| 4                   | 56.2            | 4.05 (br s)                                                                                                         |
| 5                   | 37.5            | <i>H<sub>b</sub></i> 2.66 (dd; <i>J</i> = 13.2; 11.7 Hz)<br><i>H<sub>a</sub></i> 3.14 (dd; <i>J</i> = 13.2; 4.8 Hz) |
| 5a                  | 128.3           | -                                                                                                                   |
| 6                   | 125.0           | 7.29 (d; <i>J</i> = 2.4 Hz)                                                                                         |
| 7                   | 131.1           | -                                                                                                                   |
| 8                   | 128.0           | 7.25 (dd; <i>J</i> = 8.7; 2.4 Hz)                                                                                   |
| 9                   | 121.3           | 6.86 (d; <i>J</i> = 8.7 Hz)                                                                                         |
| 9a                  | 146.0           | -                                                                                                                   |
| 1'                  | 137.2           | -                                                                                                                   |
| 2'                  | 128.9           | 7.60 (s)                                                                                                            |
| 3'                  | 137.1           | -                                                                                                                   |
| 4'                  | 132.4           | -                                                                                                                   |
| 5'                  | 117.6           | 7.04 (d; <i>J</i> = 8.1 Hz)                                                                                         |
| 6'                  | 129.7           | 7.59 (d; <i>J</i> = 8.1 Hz)                                                                                         |
| -CH <sub>2</sub> -I | 11.1            | 3.66-3.51 (m)                                                                                                       |
| -CH <sub>3</sub>    | 19.1            | 2.16 (s)                                                                                                            |
| -CH <sub>3</sub>    | 19.9            | 2.18 (s)                                                                                                            |
| -NH                 | -               | 9.48 (s)                                                                                                            |

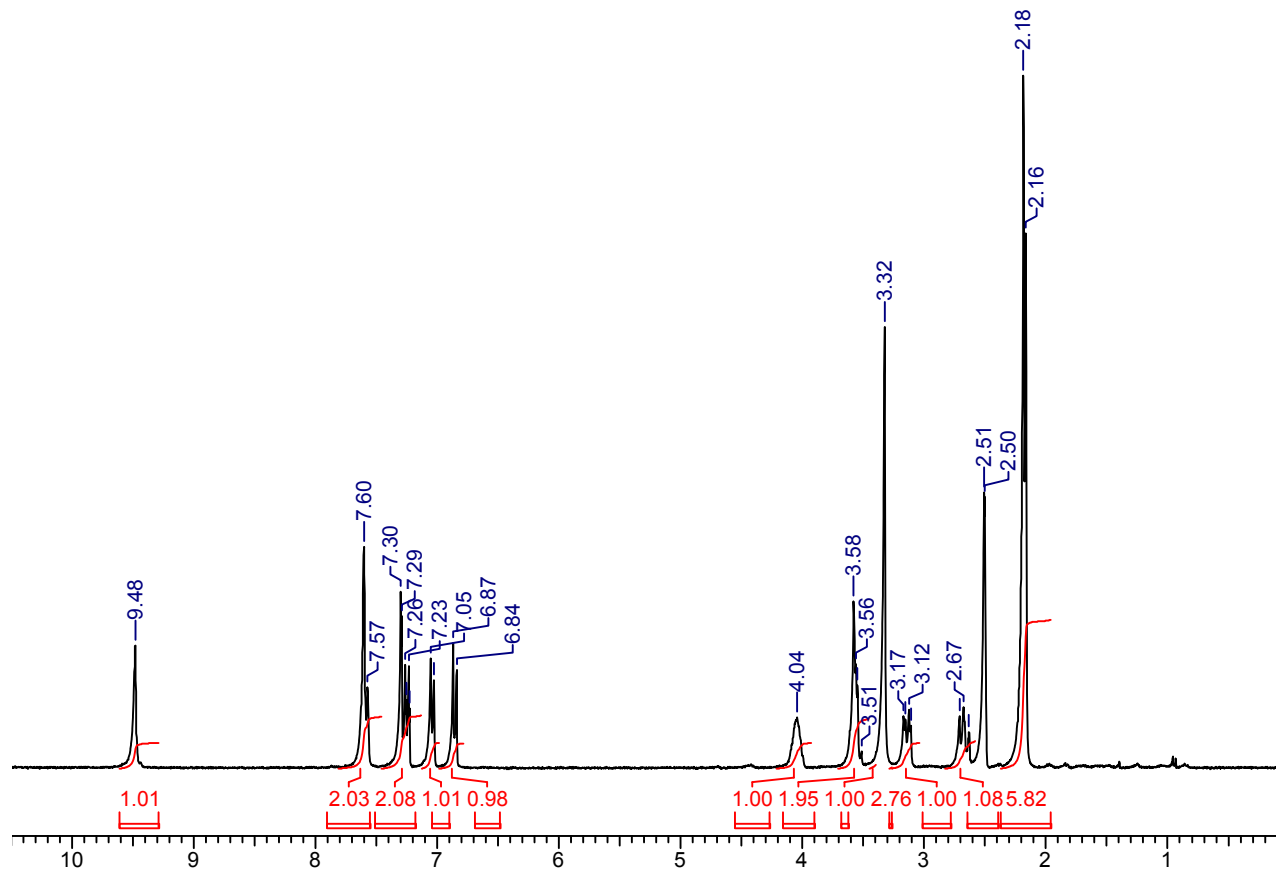

$^1\text{H}$  NMR spectrum (300 MHz,  $\text{DMSO-d}_6$ ) of compound **4c**.

13C.esp

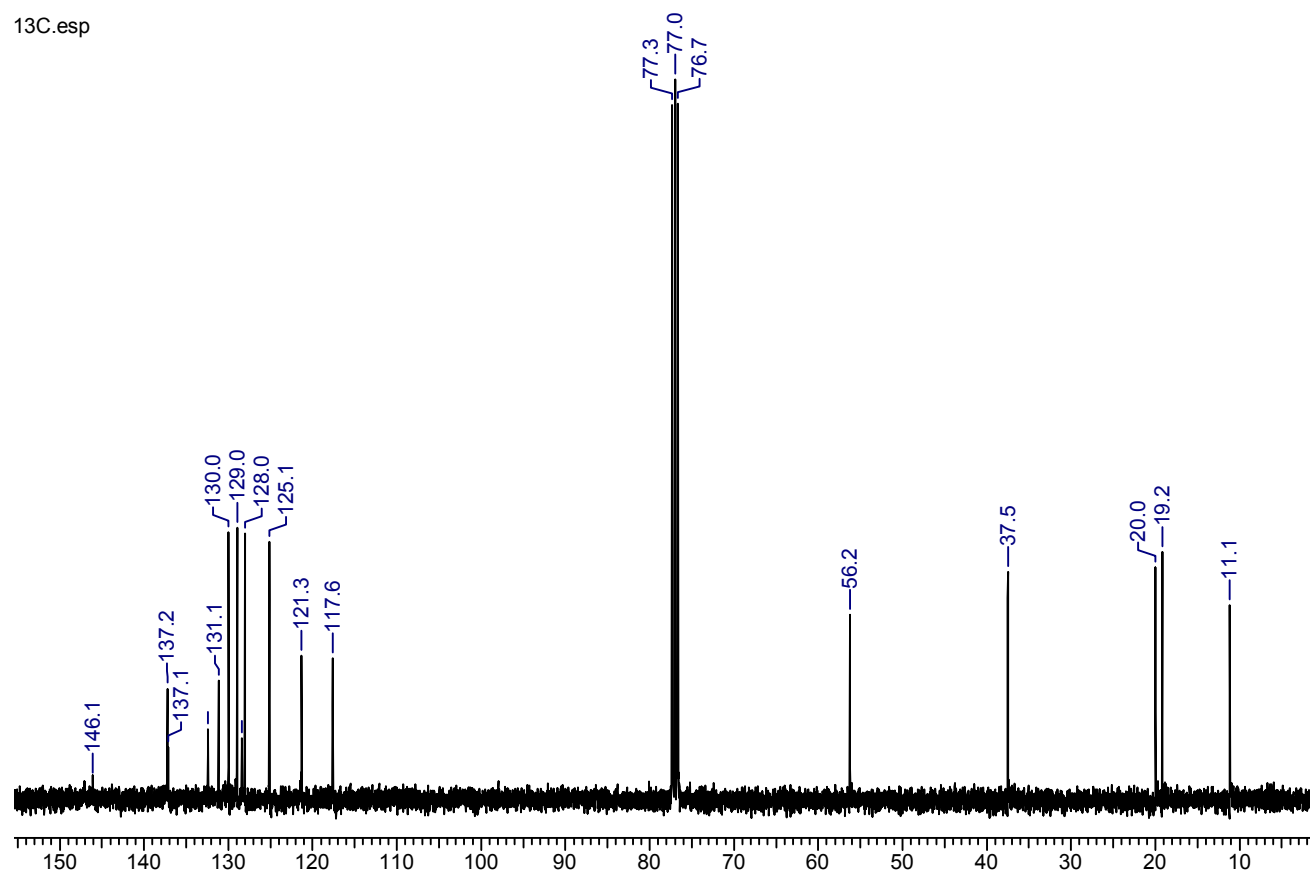

<sup>13</sup>C NMR spectrum (100 MHz, CDCl<sub>3</sub>) of compound **4c**.

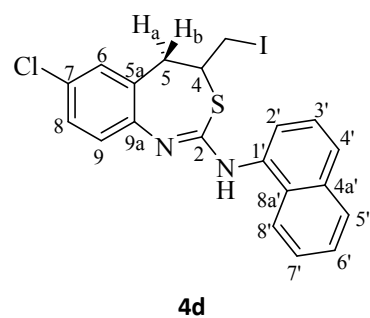

|                     | <sup>13</sup> C | <sup>1</sup> H                                                                                        |
|---------------------|-----------------|-------------------------------------------------------------------------------------------------------|
| 2                   | -               | -                                                                                                     |
| 4                   | 55.6            | 3.96 (br s)                                                                                           |
| 5                   | 37.5            | <i>H<sub>b</sub></i> 2.95 (t; <i>J</i> = 12.8 Hz)<br><i>H<sub>a</sub></i> 3.26 (d; <i>J</i> = 9.6 Hz) |
| 5a                  | 126.8           | -                                                                                                     |
| 6                   | 129.1           | 7.26 (br s)                                                                                           |
| 8                   | 125.4           | -                                                                                                     |
| 7                   | 131.5           | -                                                                                                     |
| 9                   | 124.9           | 6.94 (d; <i>J</i> = 6.0 Hz)                                                                           |
| 9a                  | 149.5           | -                                                                                                     |
| 1'                  | 128.9           | -                                                                                                     |
| 2'                  | 126.2           | 8.08 (br s)                                                                                           |
| 3'                  | 126.4           | 8.02-7.87 (m)                                                                                         |
| 5'                  | 128.8           | -                                                                                                     |
| 4'                  | 120.0           | 7.73 (d; <i>J</i> = 7.2 Hz)                                                                           |
| 4a'                 | 134.2           | -                                                                                                     |
| 6'                  | 125.7           | -                                                                                                     |
| 7'                  | 128.1           | 7.66-7.43 (m)                                                                                         |
| 8'                  | 121.0           | -                                                                                                     |
| 8a'                 | 130.4           | -                                                                                                     |
| -CH <sub>2</sub> -I | 11.1            | 3.45 (d; <i>J</i> = 10 Hz)                                                                            |

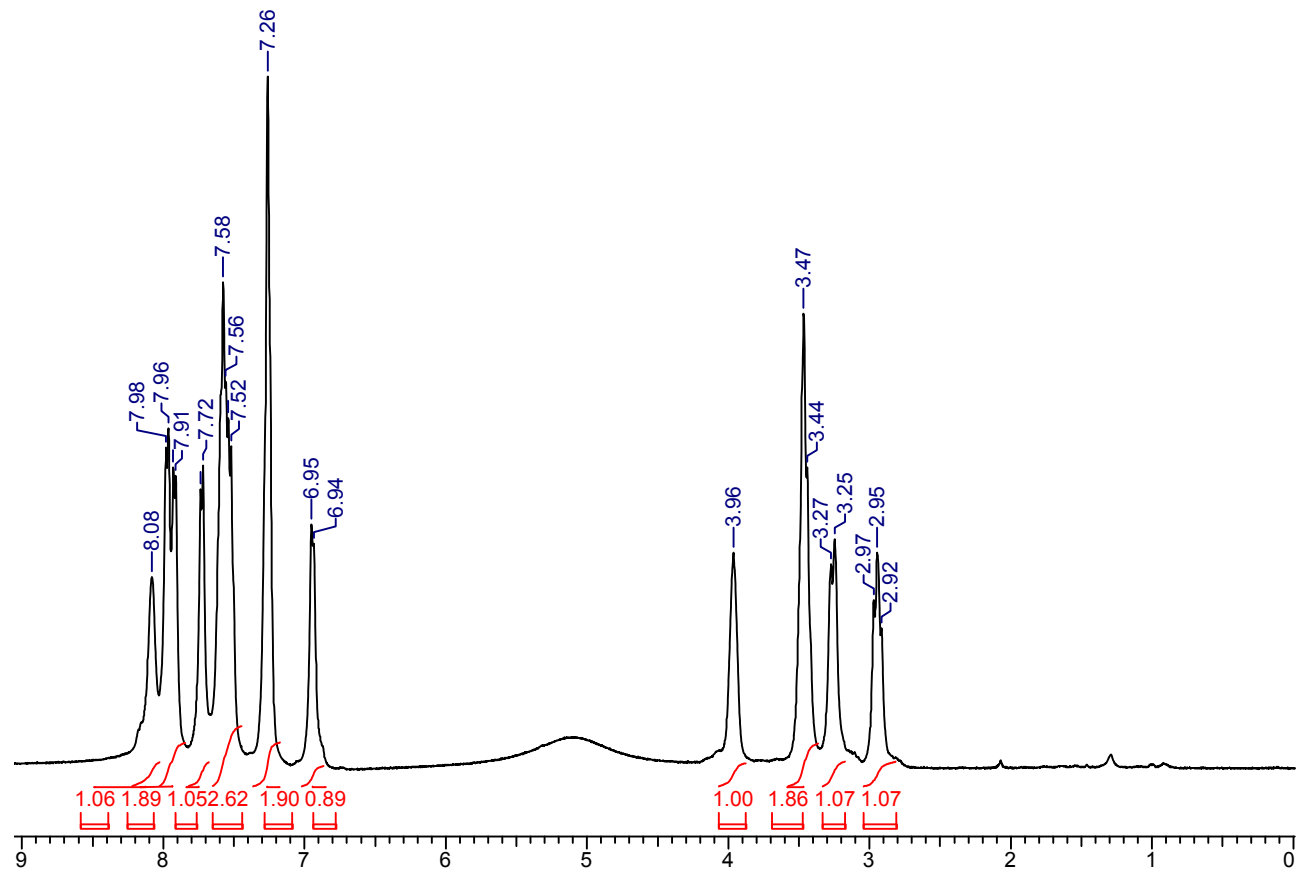

<sup>1</sup>H NMR spectrum (400 MHz, CDCl<sub>3</sub>) of compound **4d**.



-13C.esp

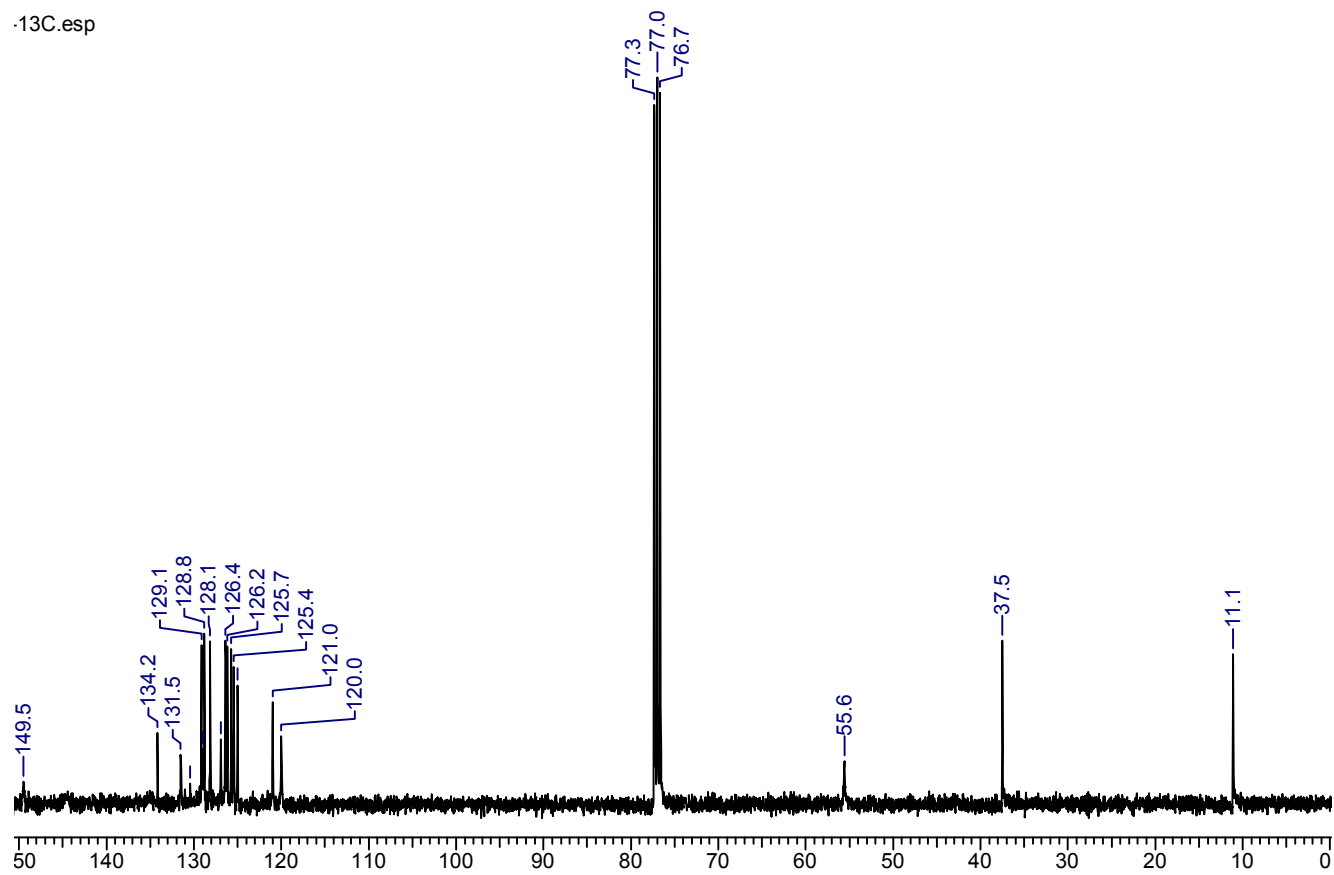

<sup>13</sup>C NMR spectrum (100 MHz, CDCl<sub>3</sub>) of compound **4d**.

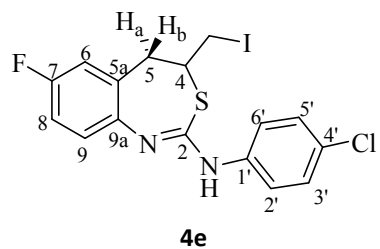

|                     | <sup>13</sup> C               | <sup>1</sup> H                                                                                                      |
|---------------------|-------------------------------|---------------------------------------------------------------------------------------------------------------------|
| 2                   | -                             | -                                                                                                                   |
| 4                   | 56.5                          | 4.15-4.01 (m)                                                                                                       |
| 5                   | 37.5                          | <i>H<sub>b</sub></i> 2.68 (dd; <i>J</i> = 13.2; 10.2 Hz)<br><i>H<sub>a</sub></i> 3.14 (dd; <i>J</i> = 13.2; 4.5 Hz) |
| 5a                  | 130.9 (d, <i>J</i> =7.8 Hz)   |                                                                                                                     |
| 6                   | 115.8 (d, <i>J</i> = 22.4 Hz) | 7.11 (dd; <i>J</i> = 9.3; 2.7 Hz)                                                                                   |
| 7                   | 159.0 (d, <i>J</i> =241.6 Hz) |                                                                                                                     |
| 8                   | 114.8 (d, <i>J</i> =22.5 Hz)  | 7.04 (dd; <i>J</i> = 8.4; 2.7 Hz)                                                                                   |
| 9                   | 125.0 (d, <i>J</i> =7.8 Hz)   | 6.89 (dd; <i>J</i> = 8.4; 5.4 Hz)                                                                                   |
| 9a                  | -                             | -                                                                                                                   |
| 1'                  | 138.0                         | -                                                                                                                   |
| 2', 6'              | 121.1                         | 7.34 (d; <i>J</i> = 9.0 Hz)                                                                                         |
| 3', 5'              | 128.9                         | 7.92 (d; <i>J</i> = 9.0 Hz)                                                                                         |
| 4'                  | 128.6                         | -                                                                                                                   |
| -CH <sub>2</sub> -I | 11.0                          | 3.58 (d; <i>J</i> = 6.6 Hz)                                                                                         |
| -NH                 | -                             | 9.76 (s)                                                                                                            |

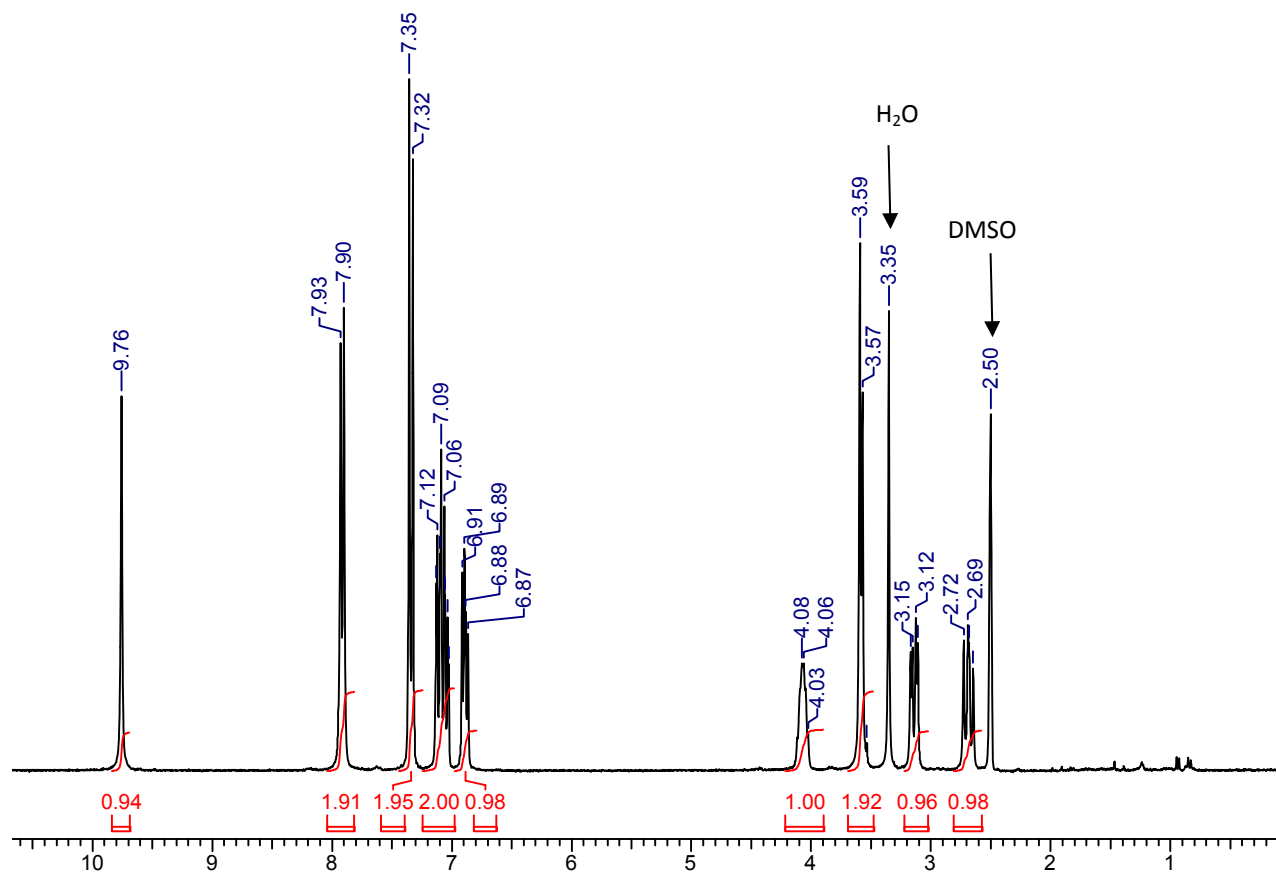

<sup>1</sup>H NMR spectrum (300 MHz, DMSO-d<sub>6</sub>) of compound **4e**.

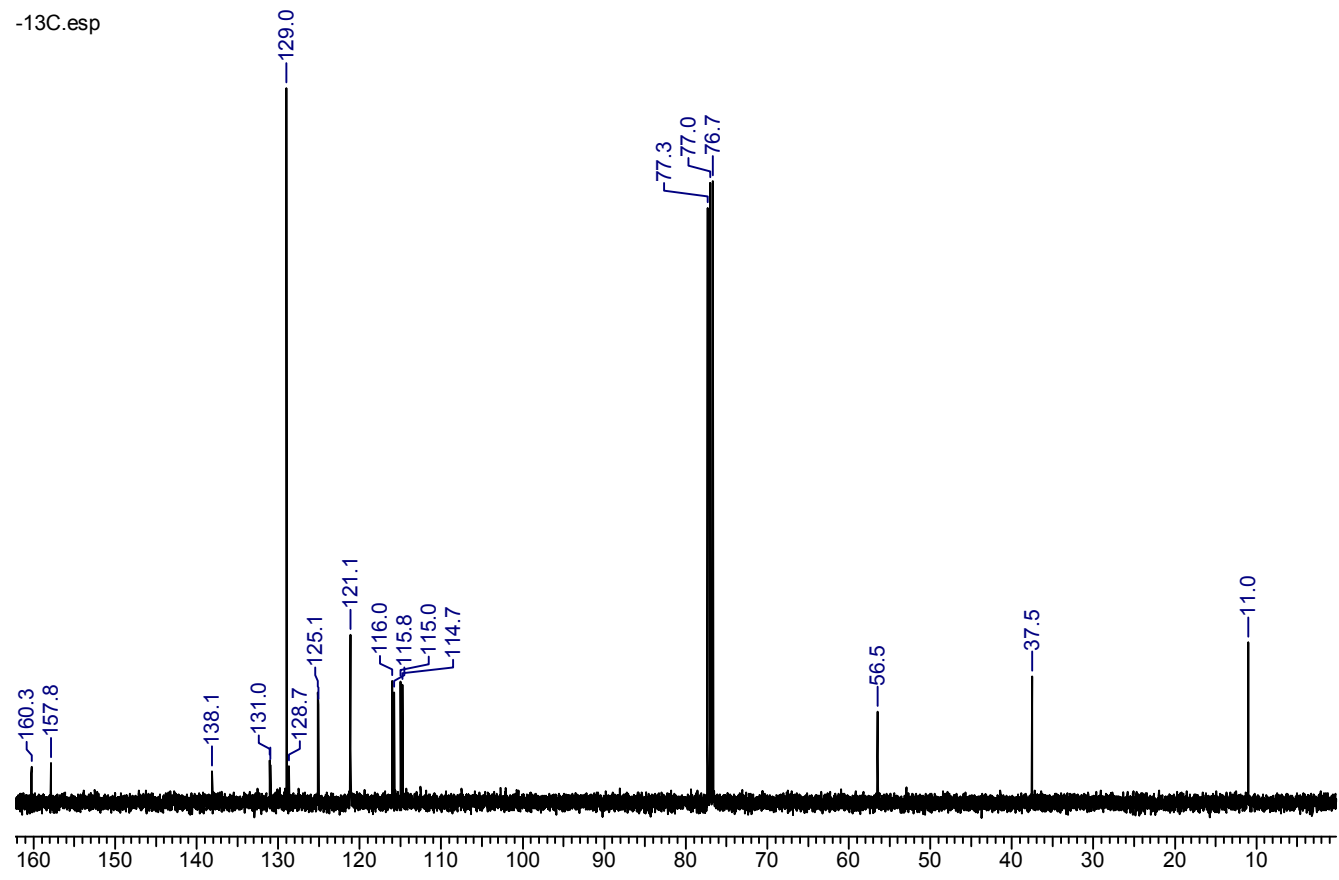

$^{13}\text{C}$  NMR spectrum (100 MHz,  $\text{CDCl}_3$ ) of compound **4e**.

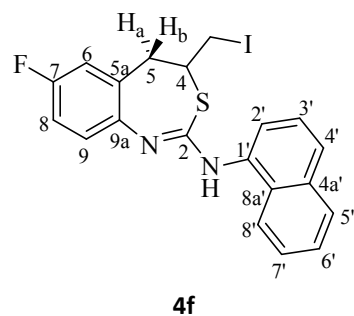

|                     | <sup>13</sup> C                | <sup>1</sup> H                                                                                |
|---------------------|--------------------------------|-----------------------------------------------------------------------------------------------|
| 2                   | -                              | -                                                                                             |
| 4                   | 55.4                           | 3.98 (br s)                                                                                   |
| 5                   | 37.5                           | <i>H<sub>b</sub></i> 2.90-2.70 (m)<br><i>H<sub>a</sub></i> 3.23 (dd; <i>J</i> = 13.2; 4.2 Hz) |
| 5a                  | 126.9                          | -                                                                                             |
| 6                   | 115.9 (d, <i>J</i> =23.3 Hz)   | 7.06-6.96 (m)                                                                                 |
| 8                   | 114.8 (d; <i>J</i> =21.7 Hz)   | 7.11 (dd; <i>J</i> = 9.0; 2.7 Hz)                                                             |
| 7                   | 159.1 (d; <i>J</i> = 241.6 Hz) | -                                                                                             |
| 9                   | 125.0 (d, <i>J</i> =8.6 Hz)    | 6.74 (br s)                                                                                   |
| 9a                  | 147.1                          | -                                                                                             |
| 1'                  | -                              | -                                                                                             |
| 2'                  | 126.1                          | 8.12-8.00 (m)                                                                                 |
| 5'                  | 128.7                          | 7.98-7.89 (m)                                                                                 |
| 4'                  | 119.8                          | 7.81-7.71 (m)                                                                                 |
| 4a'                 | 134.4                          | -                                                                                             |
| 3'                  | 126.3                          |                                                                                               |
| 6'                  | 125.7                          | 7.62-7.46 (m)                                                                                 |
| 7'                  | 125.3                          |                                                                                               |
| 8'                  | 121.0                          |                                                                                               |
| 8a'                 | -                              | -                                                                                             |
| -CH <sub>2</sub> -I | 11.0                           | 3.56 (br s)                                                                                   |

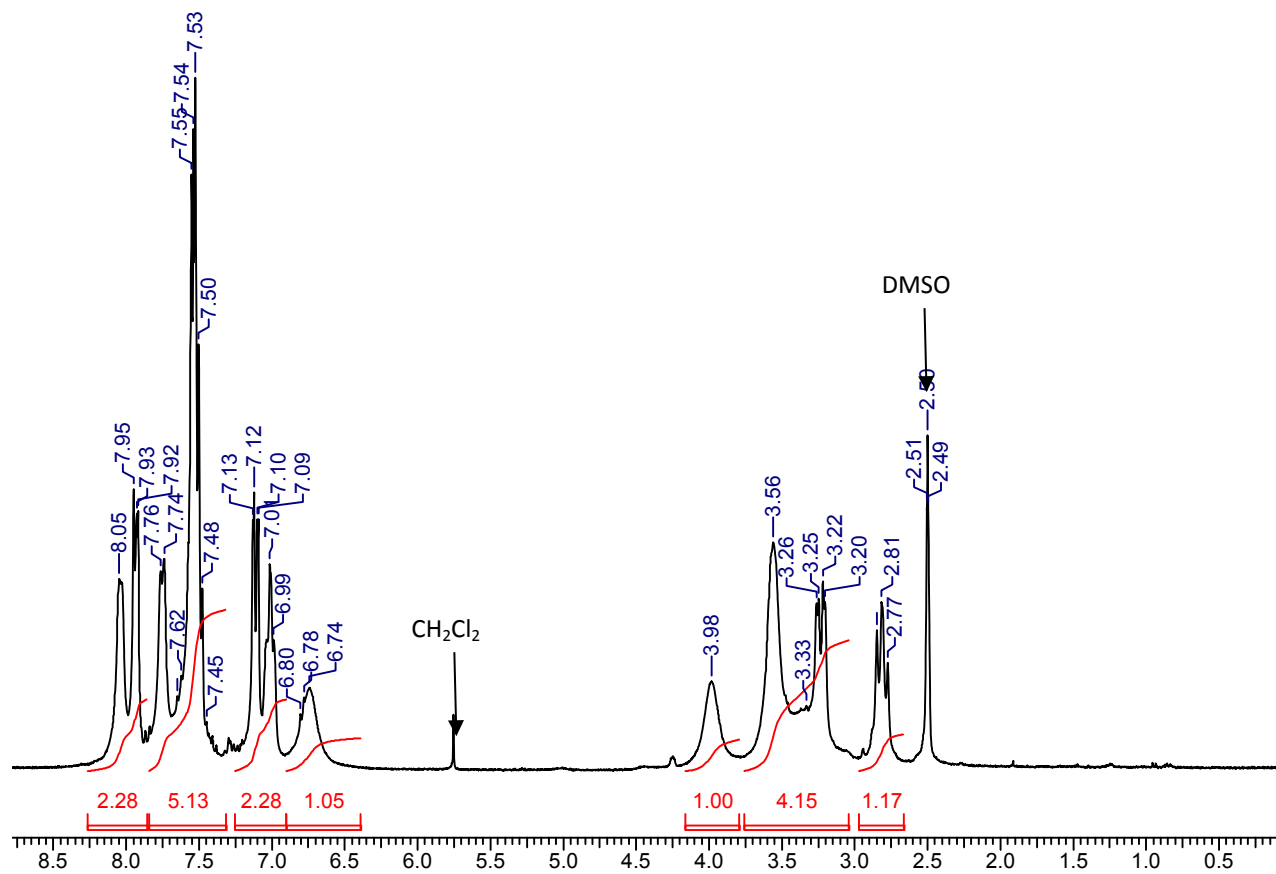

$^1\text{H}$  NMR spectrum (300 MHz,  $\text{DMSO-d}_6$ ) of compound **4f**.

e-13C.esp

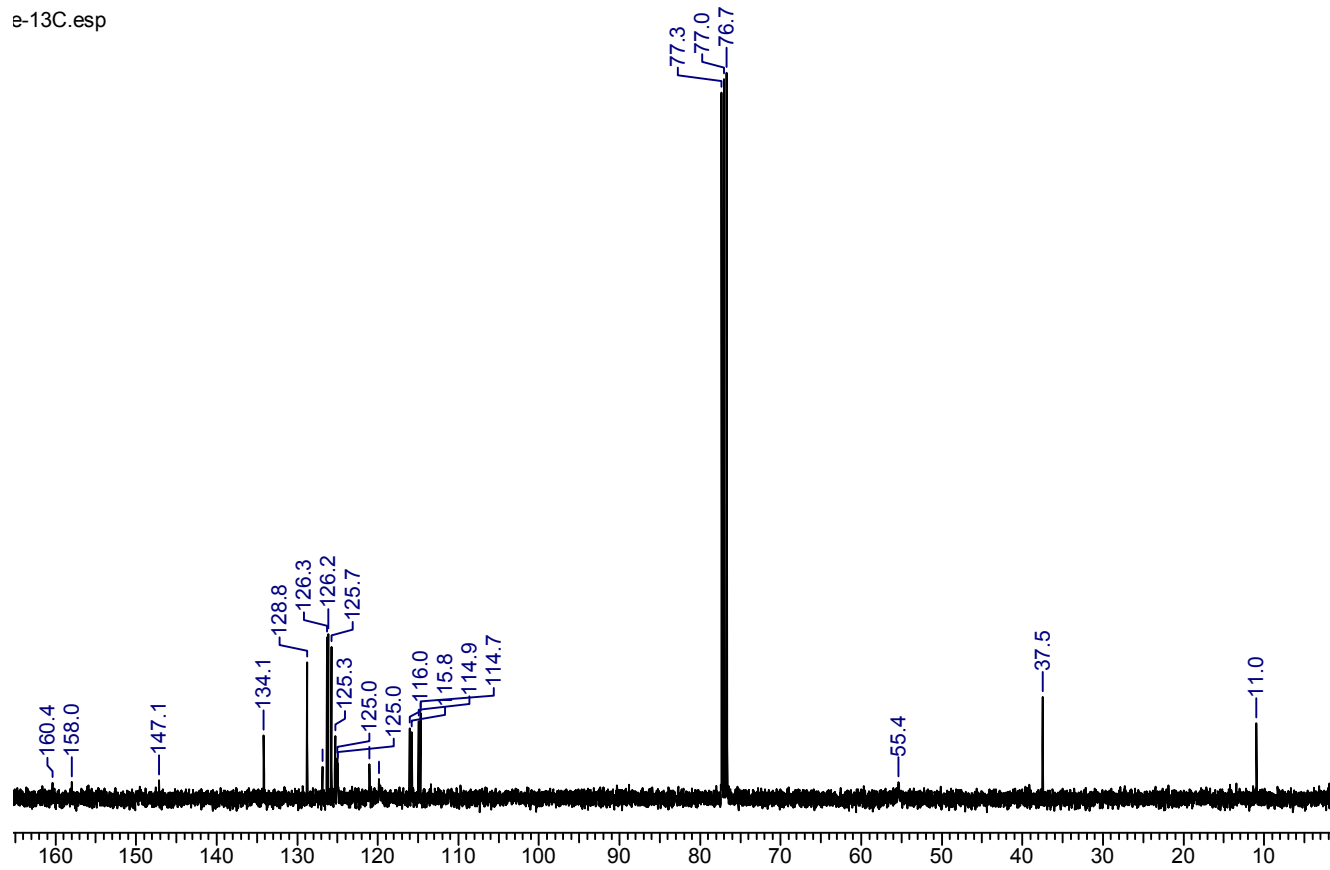

<sup>13</sup>C NMR spectrum (100 MHz, CDCl<sub>3</sub>) of compound **4f**.

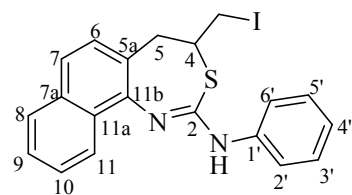

**4g**

|                     | <sup>13</sup> C |                      | <sup>1</sup> H                     |
|---------------------|-----------------|----------------------|------------------------------------|
| 2                   | -               |                      | -                                  |
| 4                   | 59.2            |                      | 4.25-4.14 (m)                      |
| 5                   | 37.9            | <i>H<sub>b</sub></i> | 3.06 (dd; <i>J</i> = 13.6; 9.6 Hz) |
|                     |                 | <i>H<sub>a</sub></i> | 3.36 (dd; <i>J</i> = 13.6; 4.4 Hz) |
| 5a                  | -               |                      | -                                  |
| 6                   | 127.5           |                      | 7.84-7.80 (m)                      |
| 7a                  | 133.5           |                      | -                                  |
| 8                   | 123.7           |                      | 8.32-8.24 (m)                      |
| 9                   | 125.7           |                      | 7.53-7.45 (m)                      |
| 7                   | 125.8           |                      |                                    |
| 10                  | 123.6           |                      | 7.60 (d; <i>J</i> = 8.4 Hz)        |
| 11                  | 127.6           |                      | 7.38 (d; <i>J</i> = 8.4 Hz)        |
| 11a                 | 128.5           |                      | -                                  |
| 11b                 | 147.2           |                      | -                                  |
| 1'                  | 139.8           |                      | -                                  |
| 2', 6'              | 119.7           |                      | 7.43 (d; <i>J</i> = 7.6 Hz)        |
| 3', 5'              | 129.1           |                      | 7.88 (d; <i>J</i> = 7.6 Hz)        |
| 4'                  | 124.2           |                      | 7.16 (t; <i>J</i> = 7.2 Hz)        |
| -CH <sub>2</sub> -I | 11.3            |                      | 3.57-3.46 (m)                      |



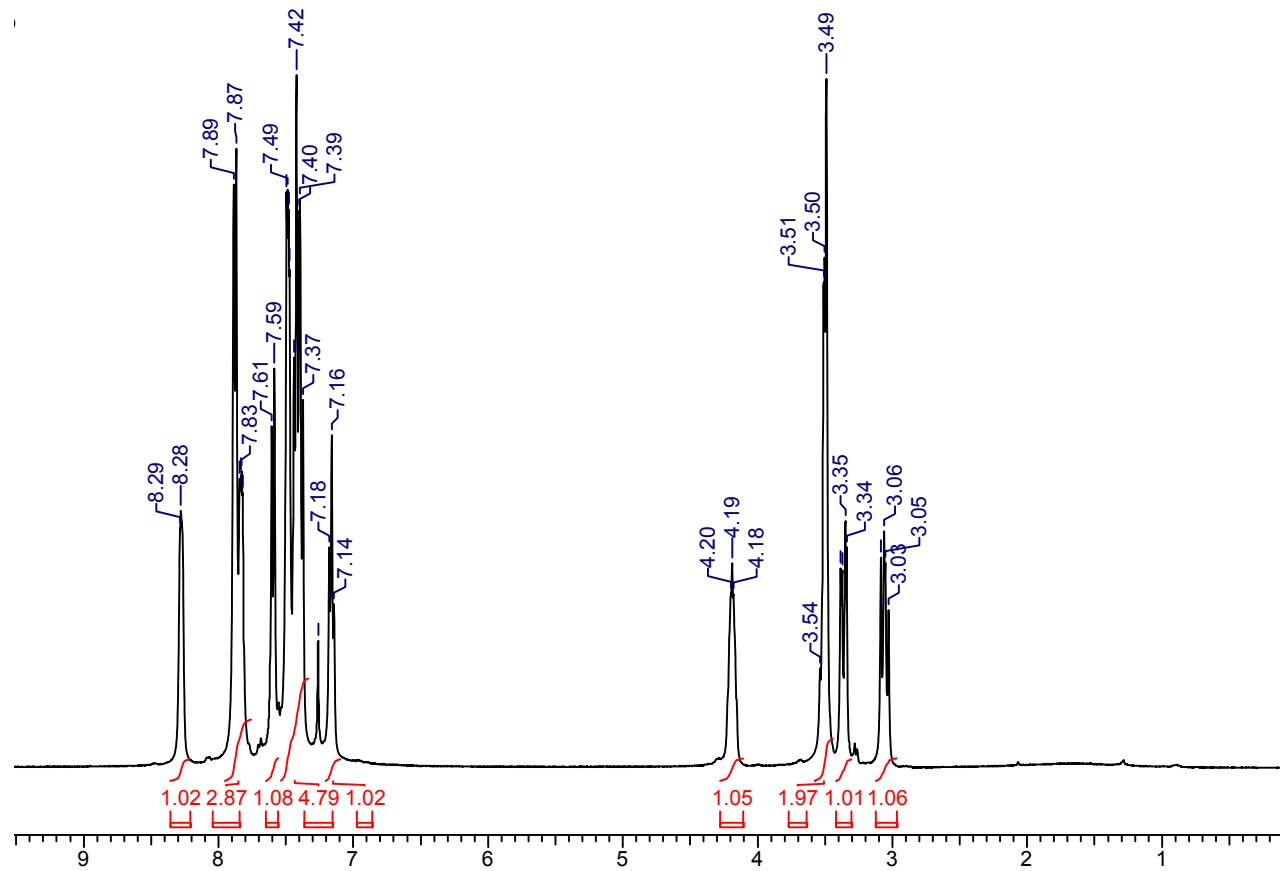

<sup>1</sup>H NMR spectrum (400 MHz, CDCl<sub>3</sub>) of compound **4g**.

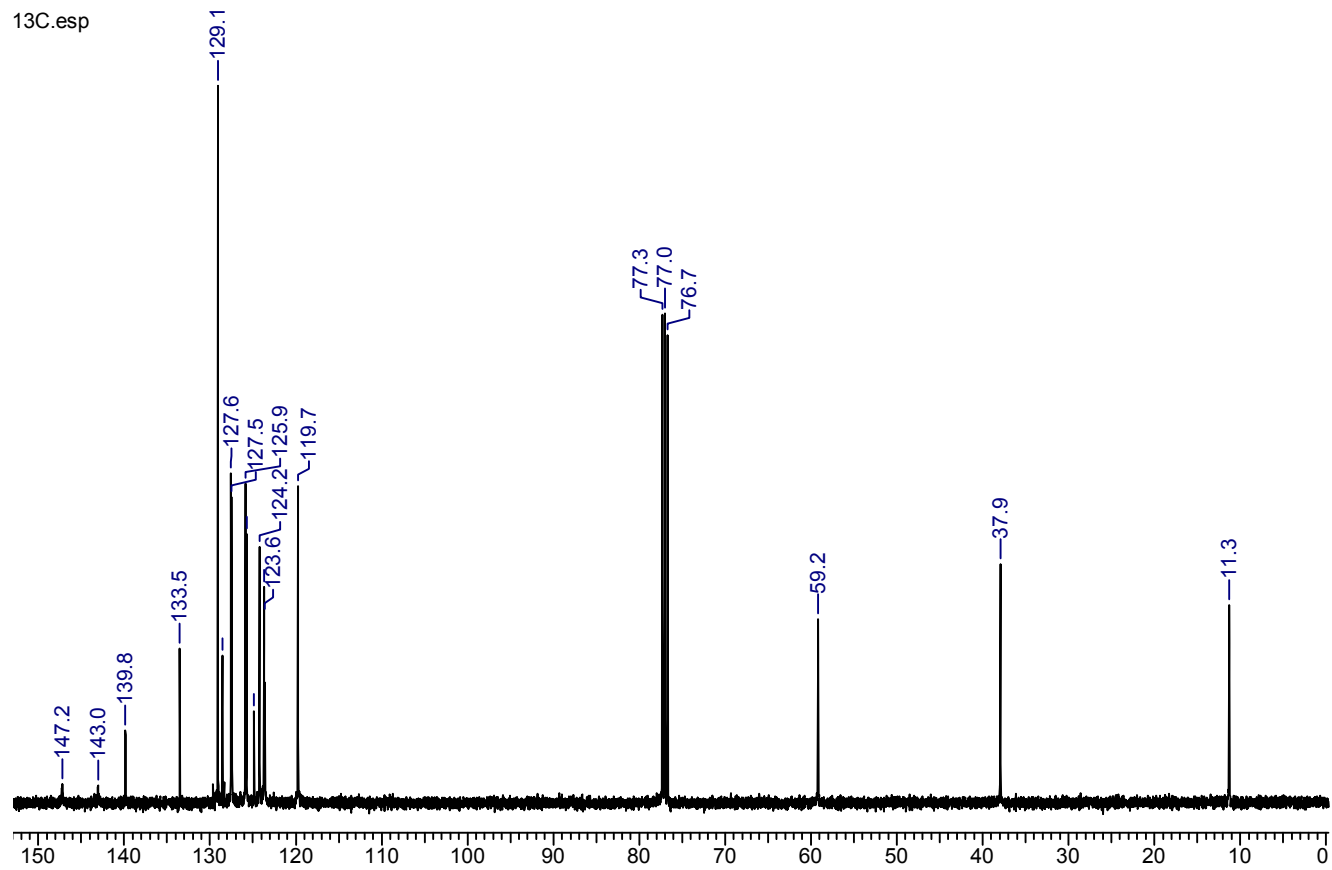

<sup>13</sup>C NMR spectrum (100 MHz, CDCl<sub>3</sub>) of compound **4g**.

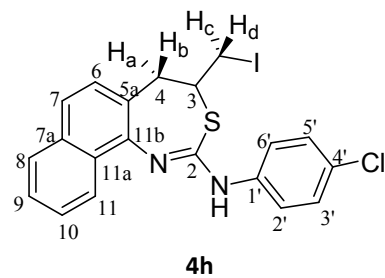

|  | <sup>13</sup> C     |       | <sup>1</sup> H                                   |
|--|---------------------|-------|--------------------------------------------------|
|  | 2                   | 178.0 | -                                                |
|  | 4                   | 60.2  | 4.26-4.24 (m)                                    |
|  | 5                   | 38.9  | <i>H<sub>b</sub></i> 3.03 (dd; J=13.5, 9.9 Hz)   |
|  |                     |       | <i>H<sub>a</sub></i> 3.40 (dd; J=13.5, 4.5 Hz)   |
|  | 5a                  | 129.5 | -                                                |
|  | 6                   | 128.7 | 7.44 (d; J= 8.1 Hz)                              |
|  | 7                   | 124.0 | 7.61 (d; J= 8.1 Hz)                              |
|  | 7a                  | 134.6 | -                                                |
|  | 8, 9                | 126.4 | 7.50-7.47 (m)                                    |
|  | 10                  | 128.5 | 7.87-7.84 (m)                                    |
|  | 11                  | 125.0 | 8.20 (dd, J= 9.9, 5.4 Hz)                        |
|  | 11a                 | 126.6 | -                                                |
|  | 11b                 | 144.5 | -                                                |
|  | 1'                  | 141.5 | -                                                |
|  | 2', 6'              | 122.2 | 8.16 (d; J= 8.7 Hz)                              |
|  | 3', 5'              | 129.5 | 7.41 (d; J= 8.7 Hz)                              |
|  | 4'                  | 128.1 | -                                                |
|  | -CH <sub>2</sub> -I | 12.8  | <i>H<sub>c</sub></i> 3.63 (dd; J= 10.2, 5.7 Hz)  |
|  |                     |       | <i>H<sub>d</sub></i> 3.69 (dd; J= 18.3, 10.2 Hz) |
|  | -NH                 | -     | 8.98 (br)                                        |

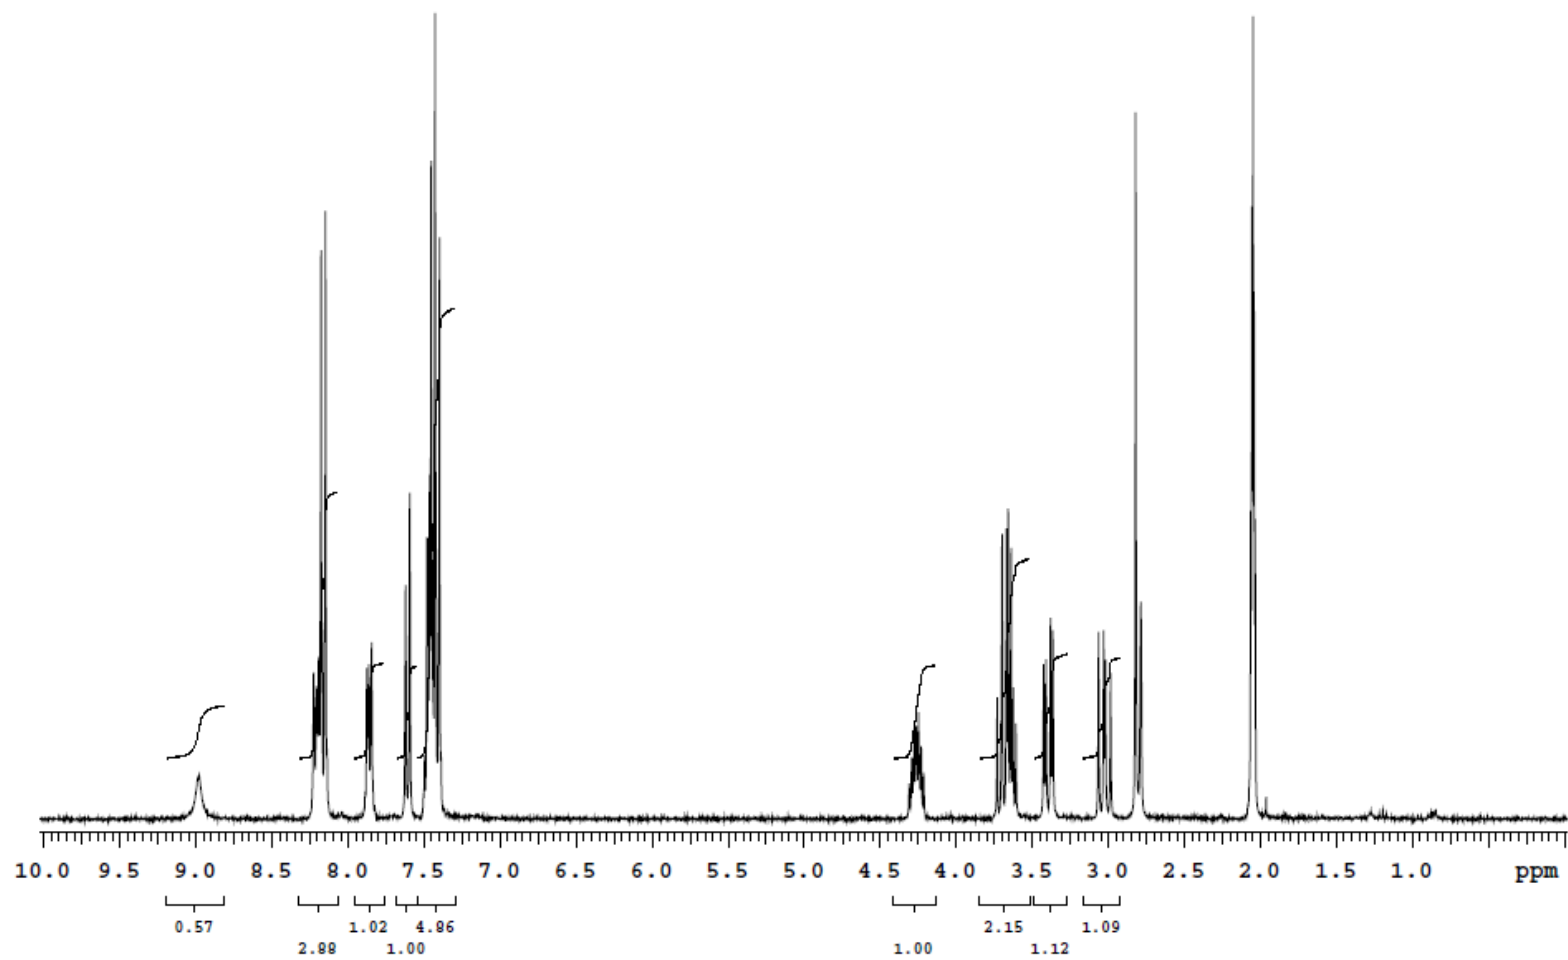

$^1\text{H}$  NMR spectrum (300 MHz,  $\text{Acetone-}d_6$ ) of compound **4h**.

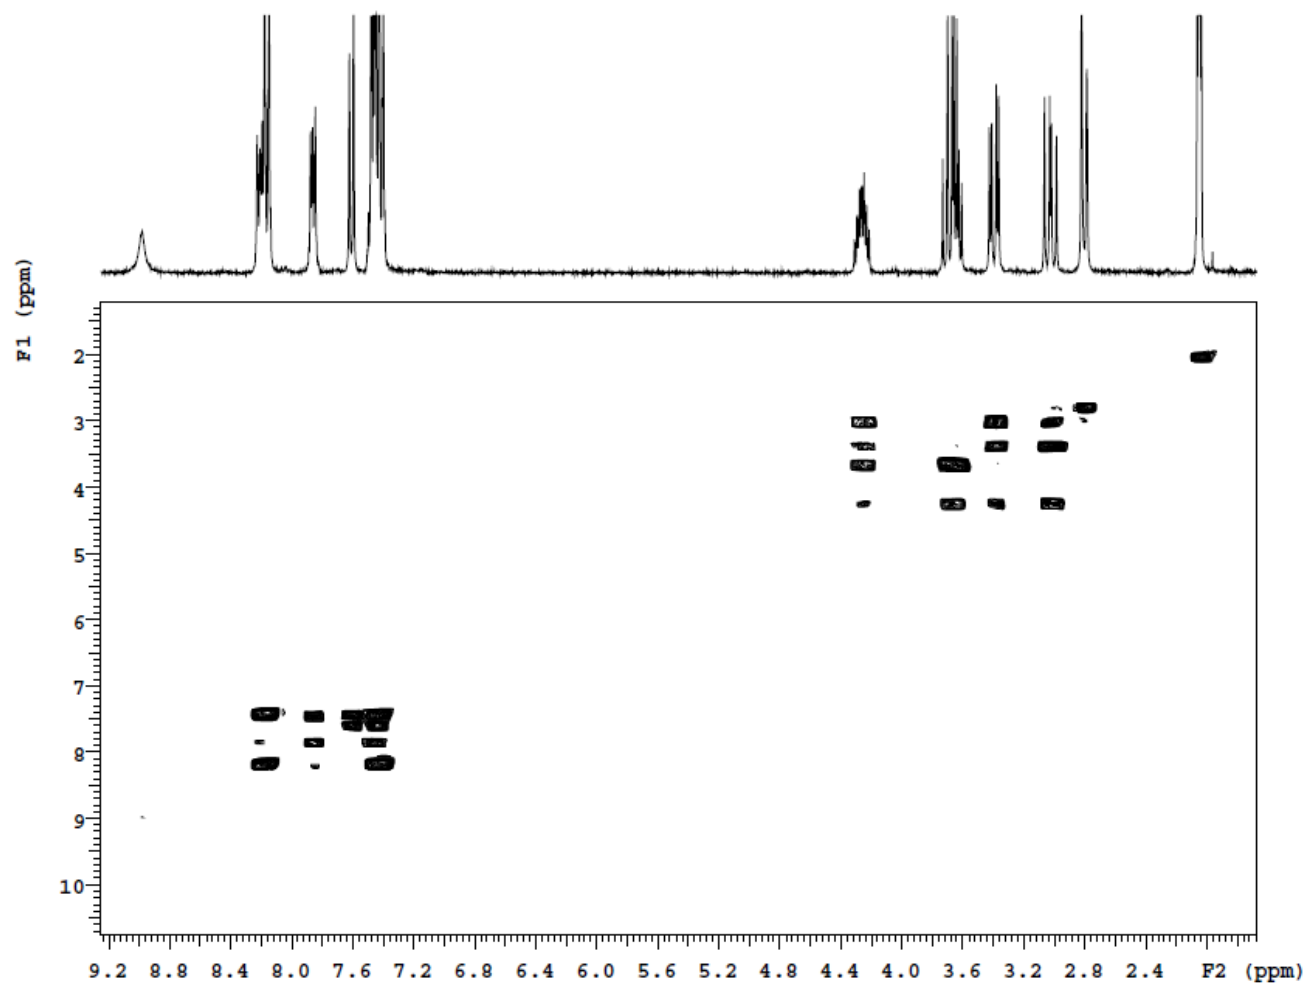

COSY spectrum of **4h** (Acetone- $d_6$ )

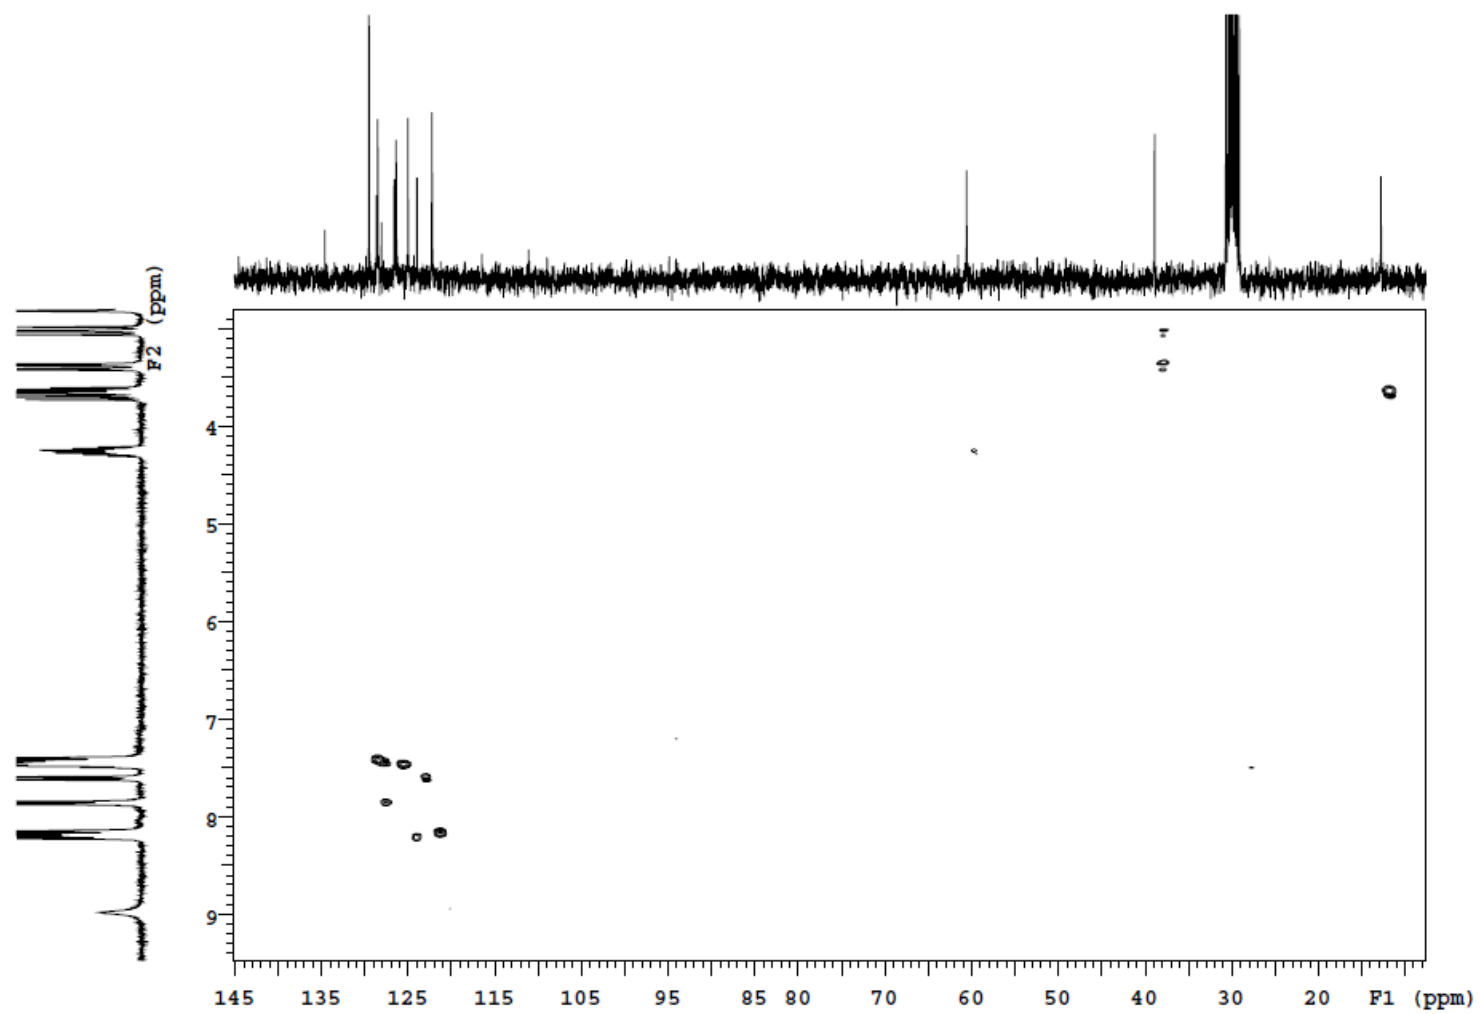

HMQC spectrum of **4h** (Acetone- $d_6$ )

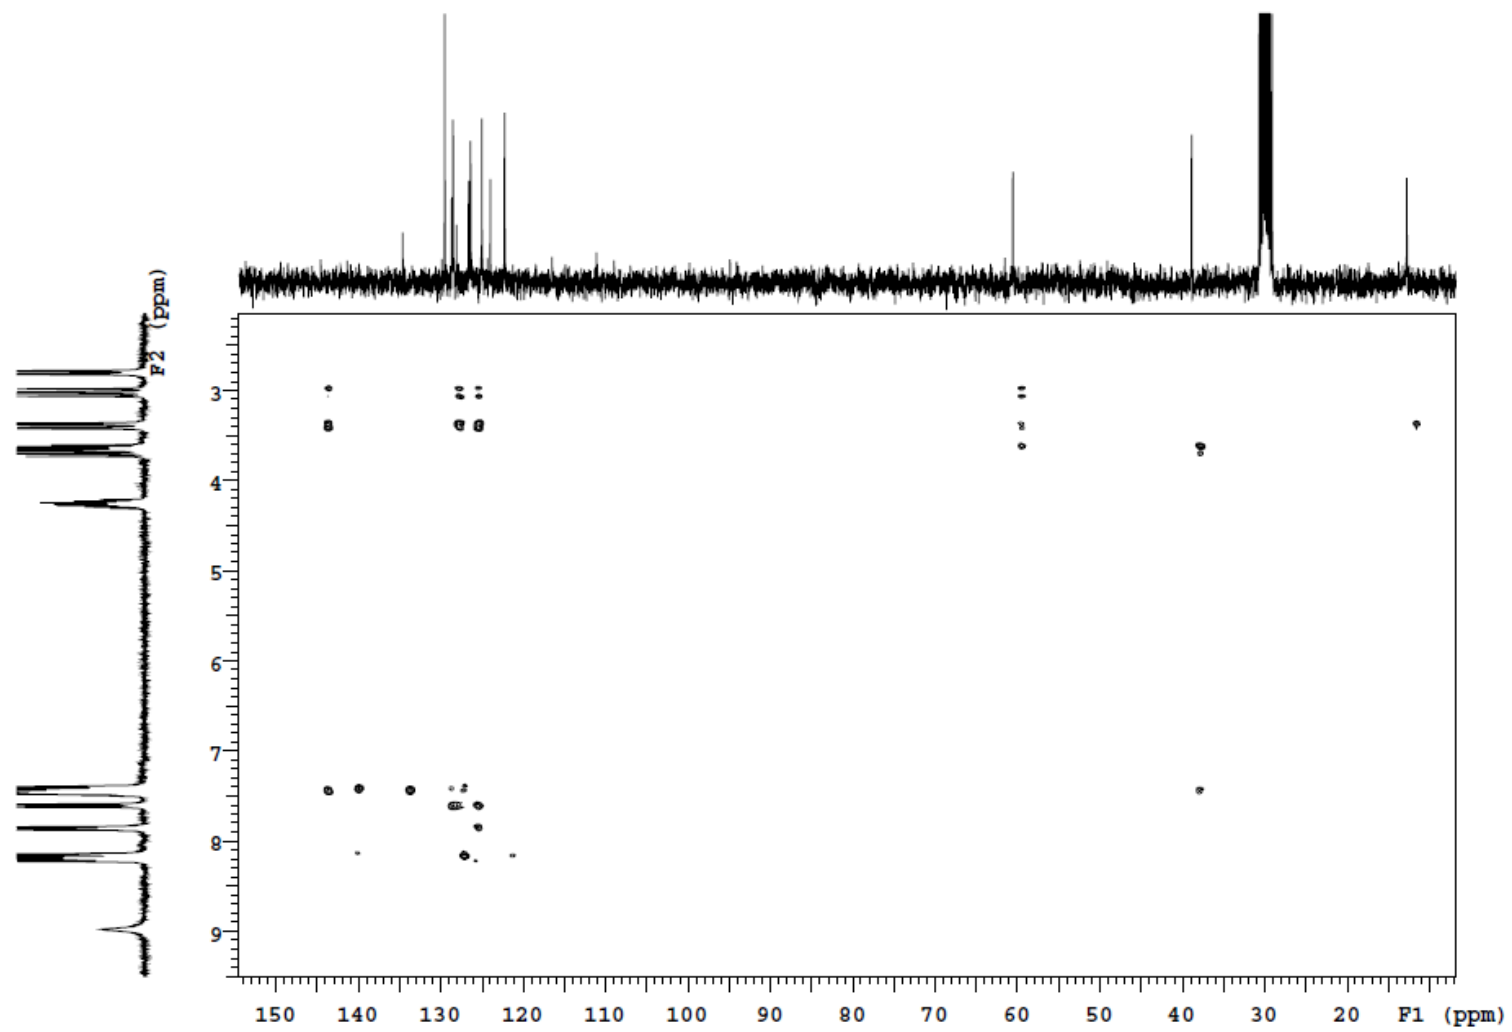

HMBC spectrum of **4h** ( $\text{Acetone-}d_6$ )

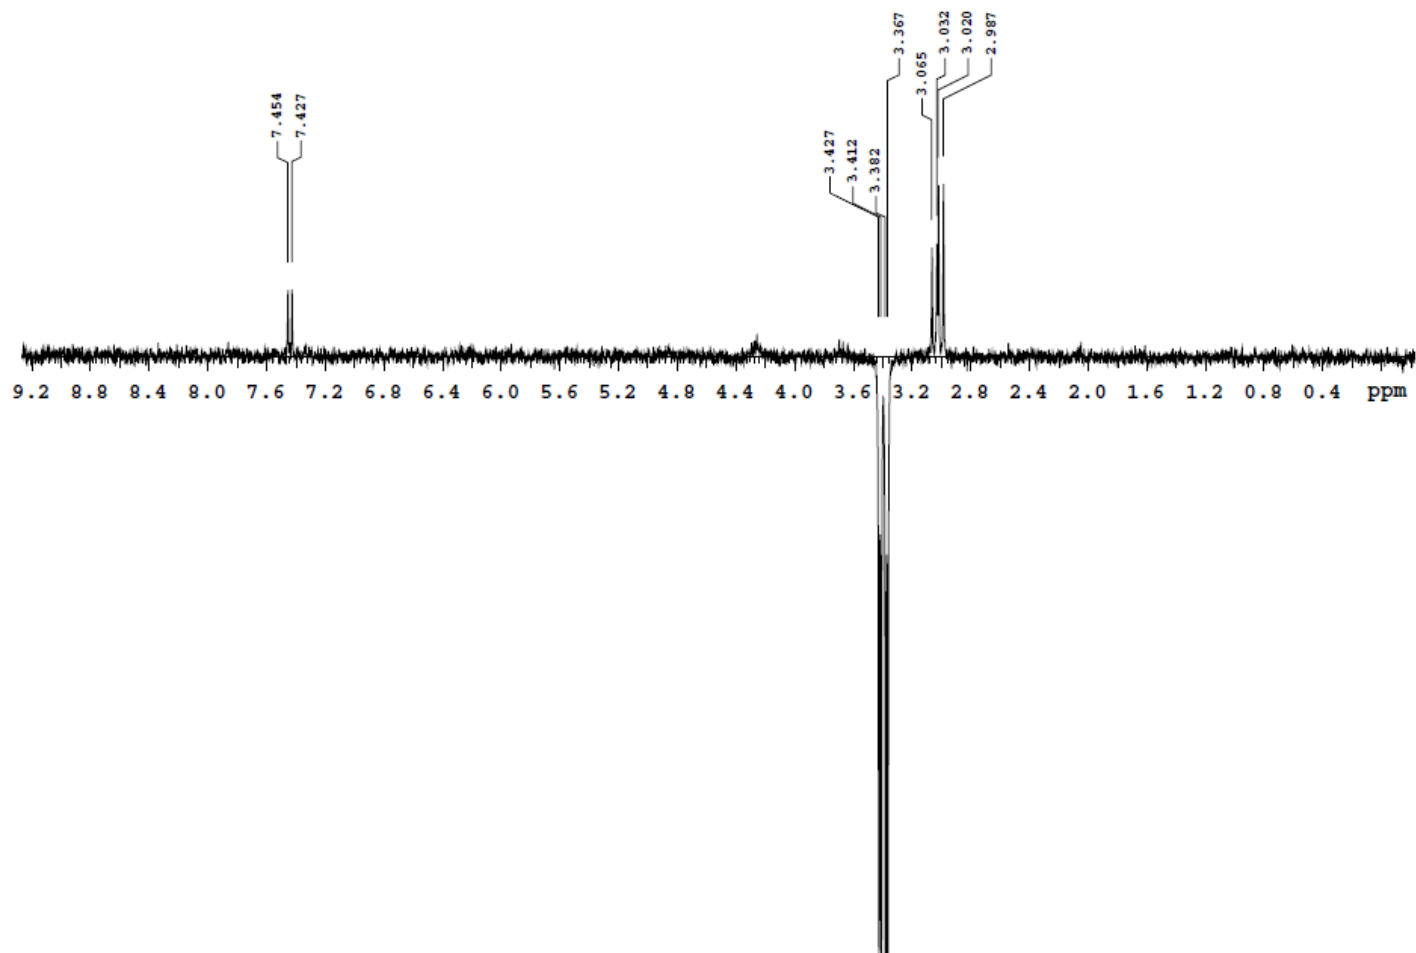

NOESY 1D spectrum of **4h** (Acetone- $d_6$ , 300 MHz) irradiating the signal at  $\delta$  3.40.



Wm39f2\_X.esp

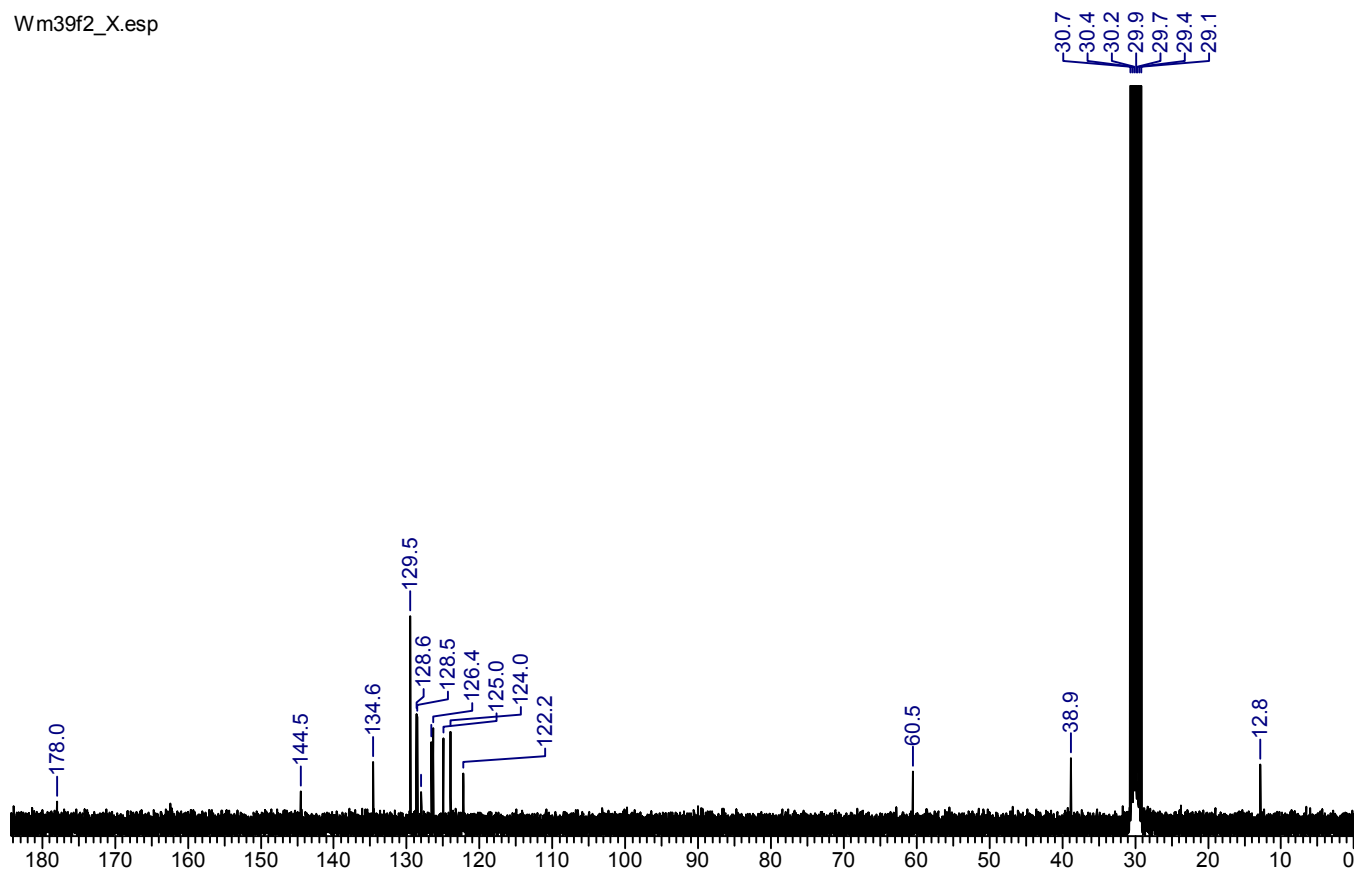

<sup>13</sup>C NMR spectrum (75 MHz, Acetone-d<sub>6</sub>) of compound **4h**.

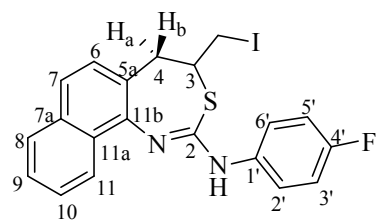

**4i**

|                     | <sup>13</sup> C               | <sup>1</sup> H                                                                                                    |
|---------------------|-------------------------------|-------------------------------------------------------------------------------------------------------------------|
| 2                   | -                             | -                                                                                                                 |
| 4                   | 58.7                          | 4.29-4.16 (m)                                                                                                     |
| 5                   | 37.8                          | <i>H<sub>b</sub></i> 2.91 (dd; <i>J</i> =13.6; 10.0 Hz)<br><i>H<sub>a</sub></i> 3.28 (dd; <i>J</i> = 13.6; 4.8Hz) |
| 5a                  | 125.2                         | -                                                                                                                 |
| 6                   | 127.5                         | 7.40 (d; <i>J</i> = 8.4 Hz)                                                                                       |
| 7                   | 125.6                         | 7.58 (d; <i>J</i> = 8.4 Hz)                                                                                       |
| 7a                  | 133.0                         | -                                                                                                                 |
| 8                   | 123.6                         | 7.50-7.43 (m)                                                                                                     |
| 9                   | 125.4                         | 7.87-7.85 (m)                                                                                                     |
| 10                  | 122.4                         | 7.87-7.85 (m)                                                                                                     |
| 11a                 | 128.0                         | -                                                                                                                 |
| 11b                 | 147.6                         |                                                                                                                   |
| 11                  | 127.8                         | 8.10-8.06 (m)                                                                                                     |
| 2', 6'              | 121.4 (d, <i>J</i> =8.2 Hz)   |                                                                                                                   |
| 1'                  | 137.4                         |                                                                                                                   |
| 3', 5'              | 115.1 (d, <i>J</i> =21.5 Hz)  | 7.21 (t; <i>J</i> = 8.8 Hz)                                                                                       |
| 4'                  | 156.6 (d, <i>J</i> =238.9 Hz) |                                                                                                                   |
| -CH <sub>2</sub> -I | 13.4                          | 3.64-3.61 (m)                                                                                                     |
| -NH                 | -                             | 9.84 (s)                                                                                                          |

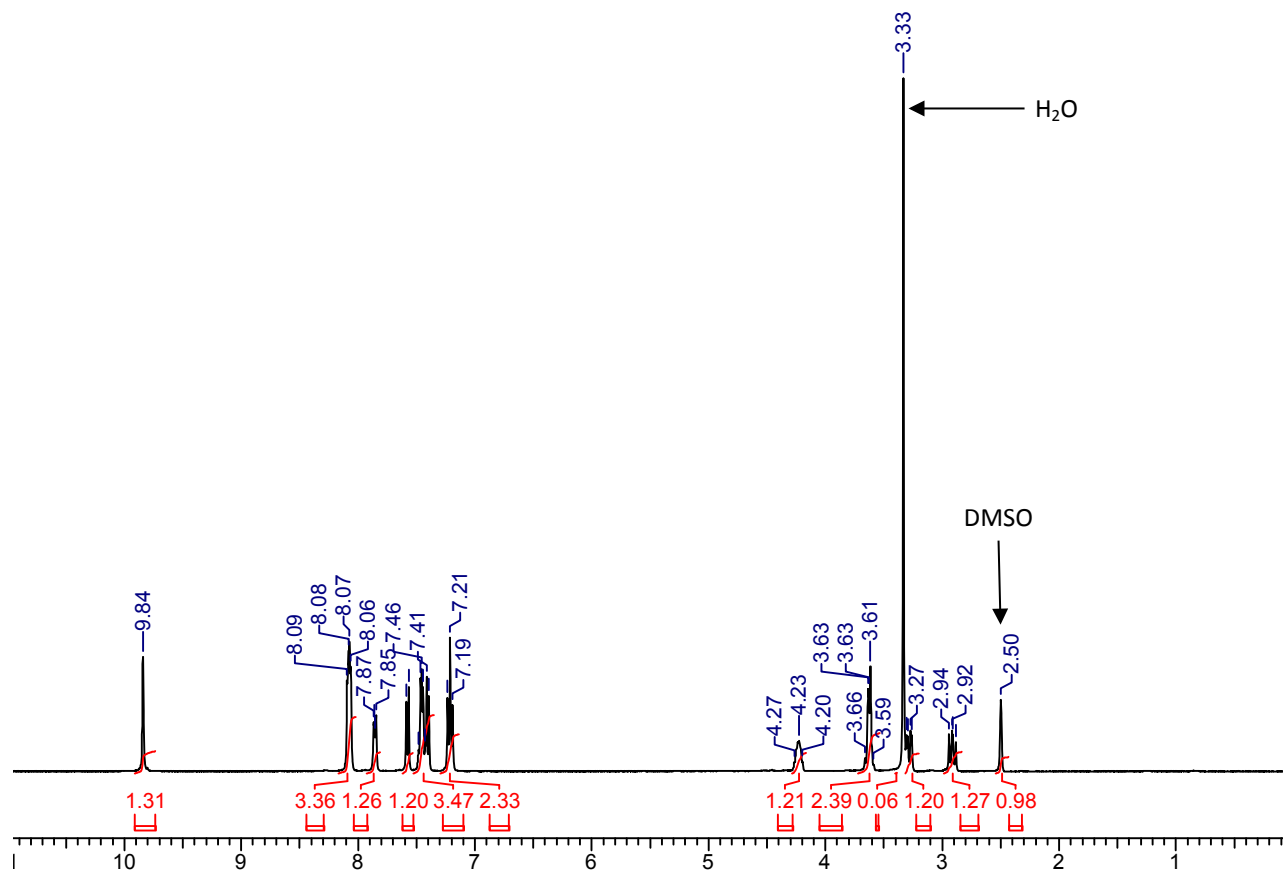

<sup>1</sup>H NMR spectrum (400 MHz, DMSO-d<sub>6</sub>) of compound **4i**.

h13C.esp

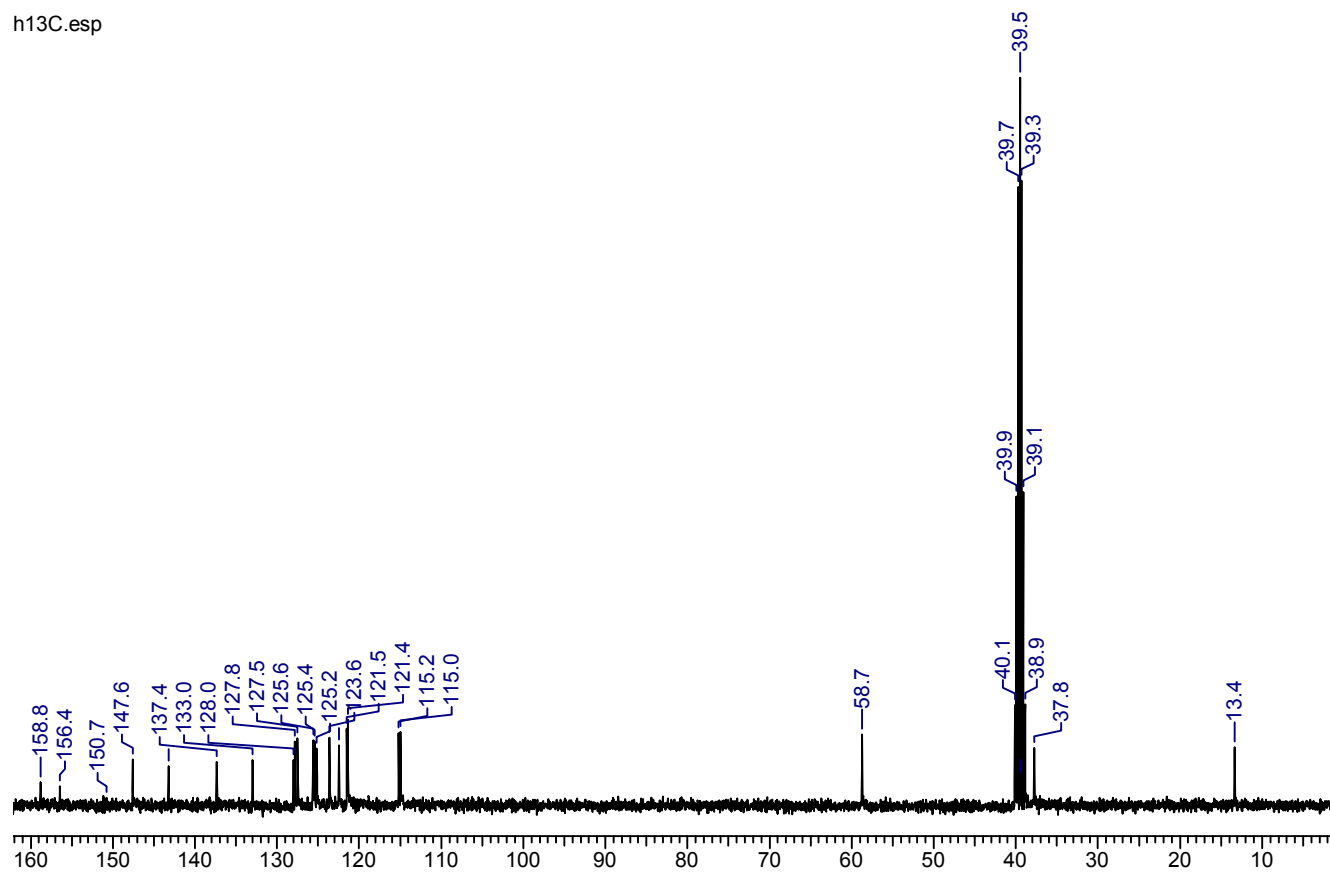

$^{13}\text{C}$  NMR spectrum (100 MHz, DMSO- $d_6$ ) of compound 4i.

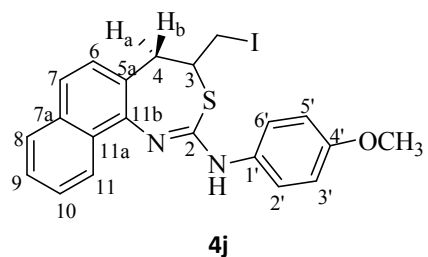

|                     | <sup>13</sup> C | <sup>1</sup> H                                          |
|---------------------|-----------------|---------------------------------------------------------|
| 2                   | -               | -                                                       |
| 4                   | 58.8            | 4.20-4.10 (m)                                           |
|                     |                 | <i>H<sub>b</sub></i> 3.36 (dd; <i>J</i> = 13.6; 4.4 Hz) |
| 5                   | 38.0            | <i>H<sub>a</sub></i> 3.05 (dd; <i>J</i> = 13.6; 9.6 Hz) |
| 5a                  | 124.9           |                                                         |
| 6                   | 127.4           | 7.37 (d; <i>J</i> = 8.4 Hz)                             |
| 7                   | 125.8           | 7.57 (d; <i>J</i> = 8.4 Hz)                             |
| 7a                  | -               | -                                                       |
| 8                   | 123.4           | 7.49-7.43 (m)                                           |
| 9                   | 125.6           |                                                         |
| 10                  | 124.3           | 7.83-7.79 (m)                                           |
| 11a                 | 128.6           | -                                                       |
| 11b                 | 133.5           | -                                                       |
| 11                  | 127.5           | 8.25-8.19 (m)                                           |
| 2', 6'              | 114.2           | 6.95 (d; <i>J</i> = 8.4 Hz)                             |
| 1'                  | 133.1           |                                                         |
| 3', 5'              | 121.6           | 7.77 (d; <i>J</i> = 8.4 Hz)                             |
| 4'                  | 156.1           | -                                                       |
| -CH <sub>2</sub> -I | 11.3            | 3.51-3.47 (m)                                           |
| -OCH <sub>3</sub>   | 55.5            | 3.84 (s)                                                |

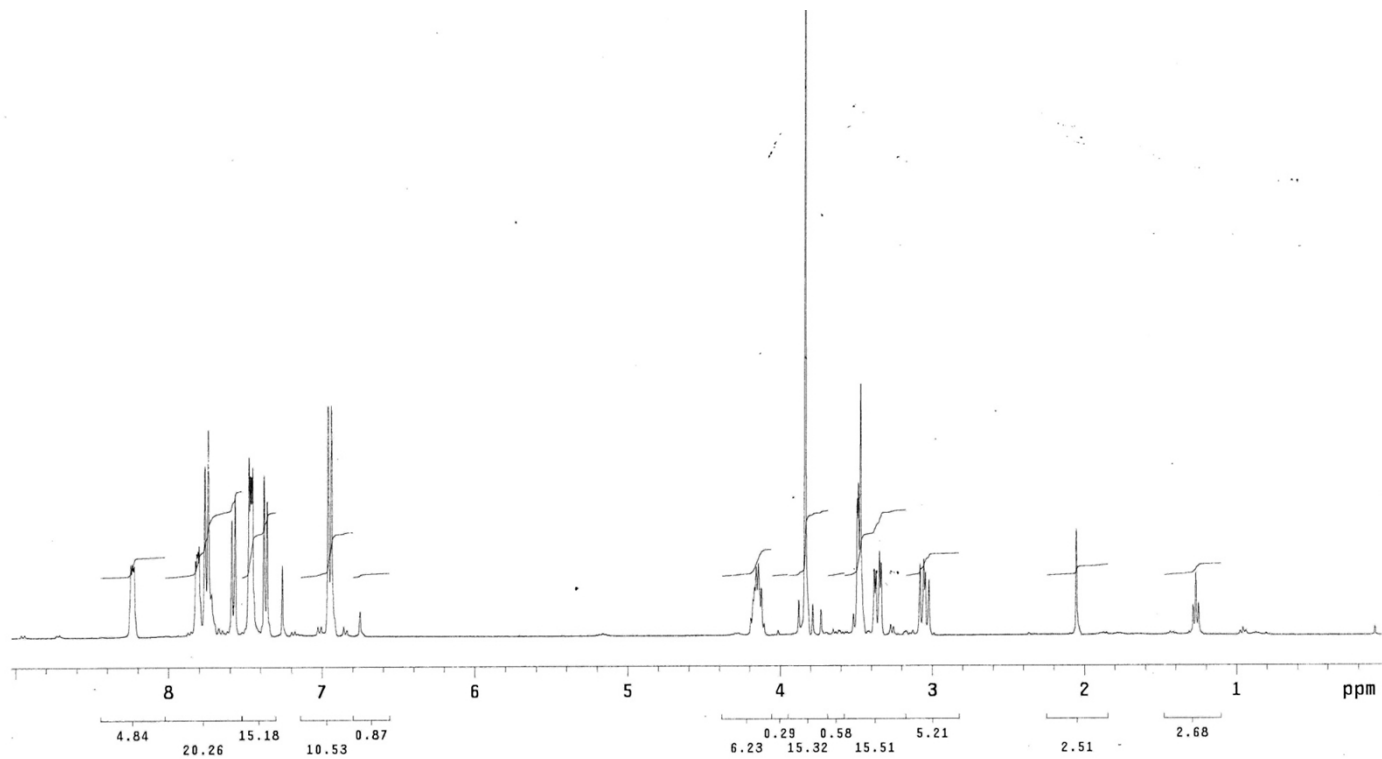

$^1\text{H}$  NMR spectrum (400 MHz,  $\text{CDCl}_3$ ) of compound **4j**.

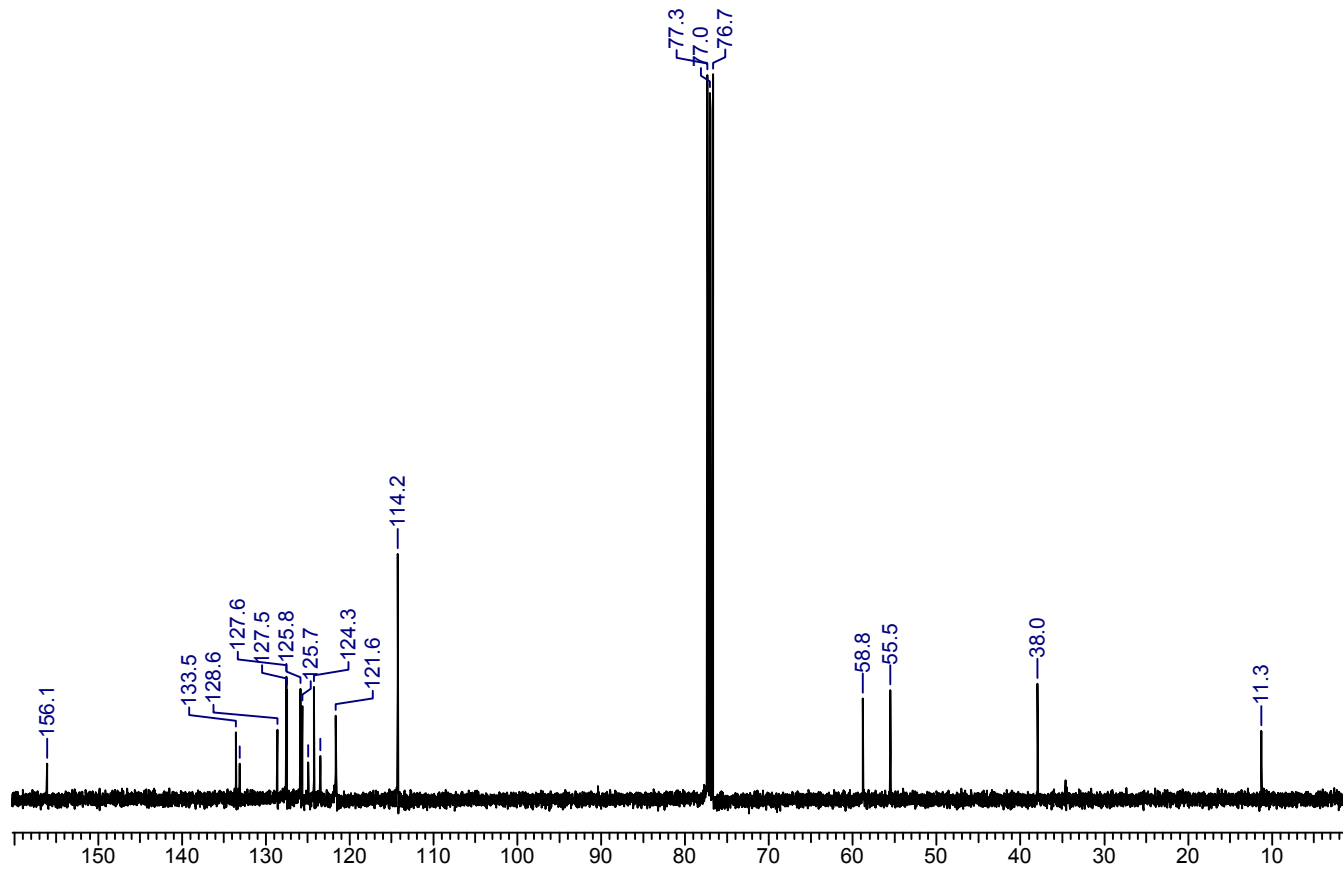

<sup>13</sup>C NMR spectrum (100 MHz, CDCl<sub>3</sub>) of compound 4j.

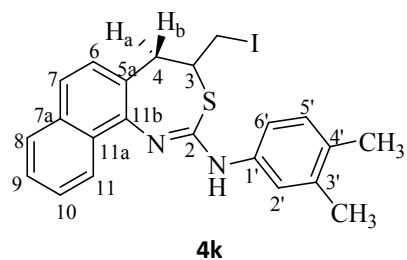

|                     | <sup>13</sup> C | <sup>1</sup> H                                           |
|---------------------|-----------------|----------------------------------------------------------|
| 2                   | -               | -                                                        |
| 4                   | 58.3            | 4.26-4.16 (m)                                            |
|                     |                 | <i>H<sub>b</sub></i> 3.28 (dd; <i>J</i> =13.6; 4.4 Hz)   |
| 5                   | 37.8            | <i>H<sub>a</sub></i> 2.91 (dd; <i>J</i> = 13.6; 10.0 Hz) |
| 5a                  | 125.0           | -                                                        |
| 6                   | 127.4           | 7.40 (d; <i>J</i> = 8.4 Hz)                              |
| 7                   | 125.3           | 7.56 (d; <i>J</i> = 8.4 Hz)                              |
| 7a                  | 133.0           | -                                                        |
| 8                   | 123.6           | 7.49-7.43 (m)                                            |
| 9                   | 125.5           |                                                          |
| 10                  | 122.2           | 7.87-7.82 (m)                                            |
| 2'                  | 121.1           |                                                          |
| 11a                 | 128.1           | -                                                        |
| 11b                 | 147.4           | -                                                        |
| 11                  | 127.8           | 8.12 (d; <i>J</i> = 7.6 Hz)                              |
| 1'                  | 138.7           | -                                                        |
| 3'                  | 135.9           | -                                                        |
| 4'                  | 130.4           | -                                                        |
| 5'                  | 117.4           | 7.76 (d; <i>J</i> = 8.4 Hz)                              |
| 6'                  | 129.4           | 7.11 (d; <i>J</i> = 8.4 Hz)                              |
| -CH <sub>2</sub> -I | 13.3            | 3.61 (d; <i>J</i> = 7.2 Hz)                              |
| -CH <sub>3</sub>    | 18.8            | 2.20 (s)                                                 |
| -CH <sub>3</sub>    | 19.7            | 2.23 (s)                                                 |
| -NH                 | -               | 9.60 (s)                                                 |



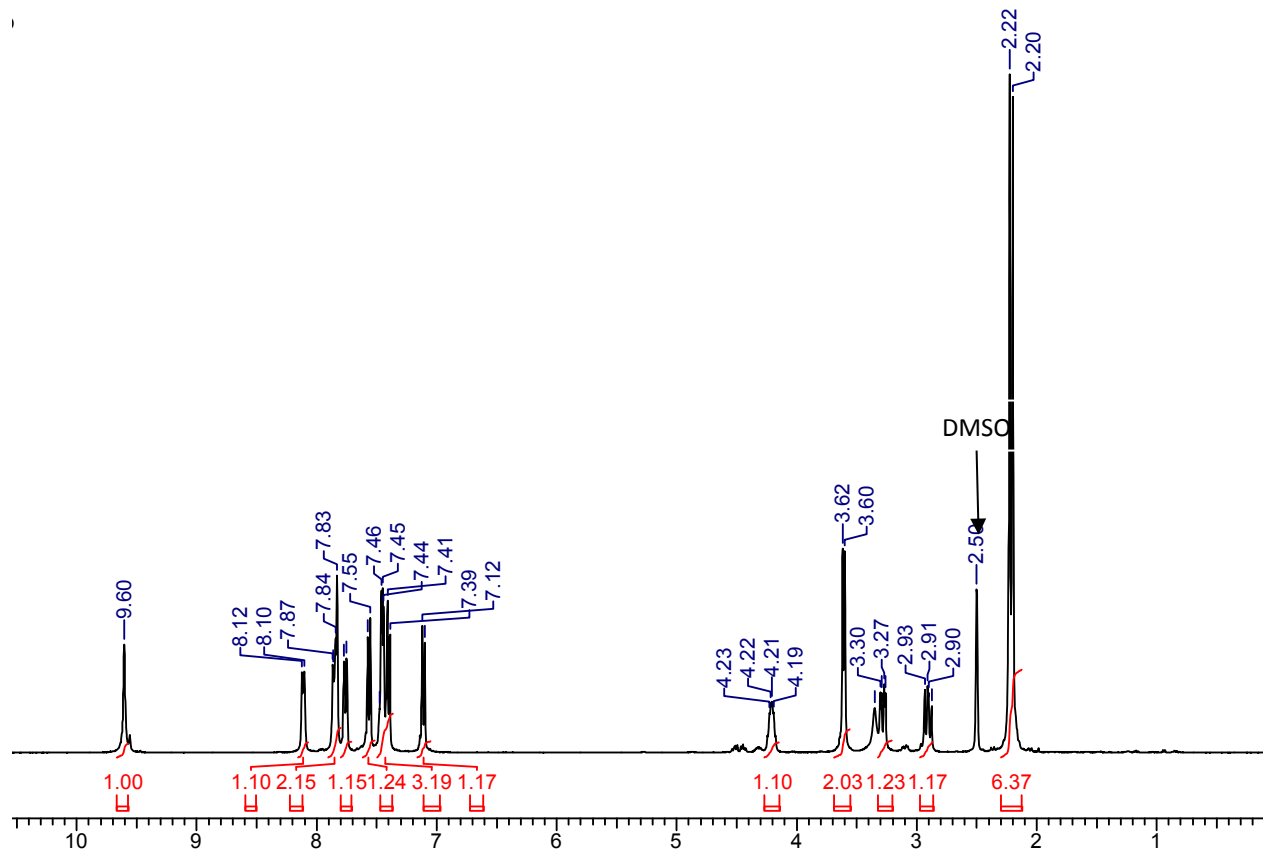

$^1\text{H}$  NMR spectrum (400 MHz,  $\text{DMSO-}d_6$ ) of compound **4k**.

4k-13C.esp

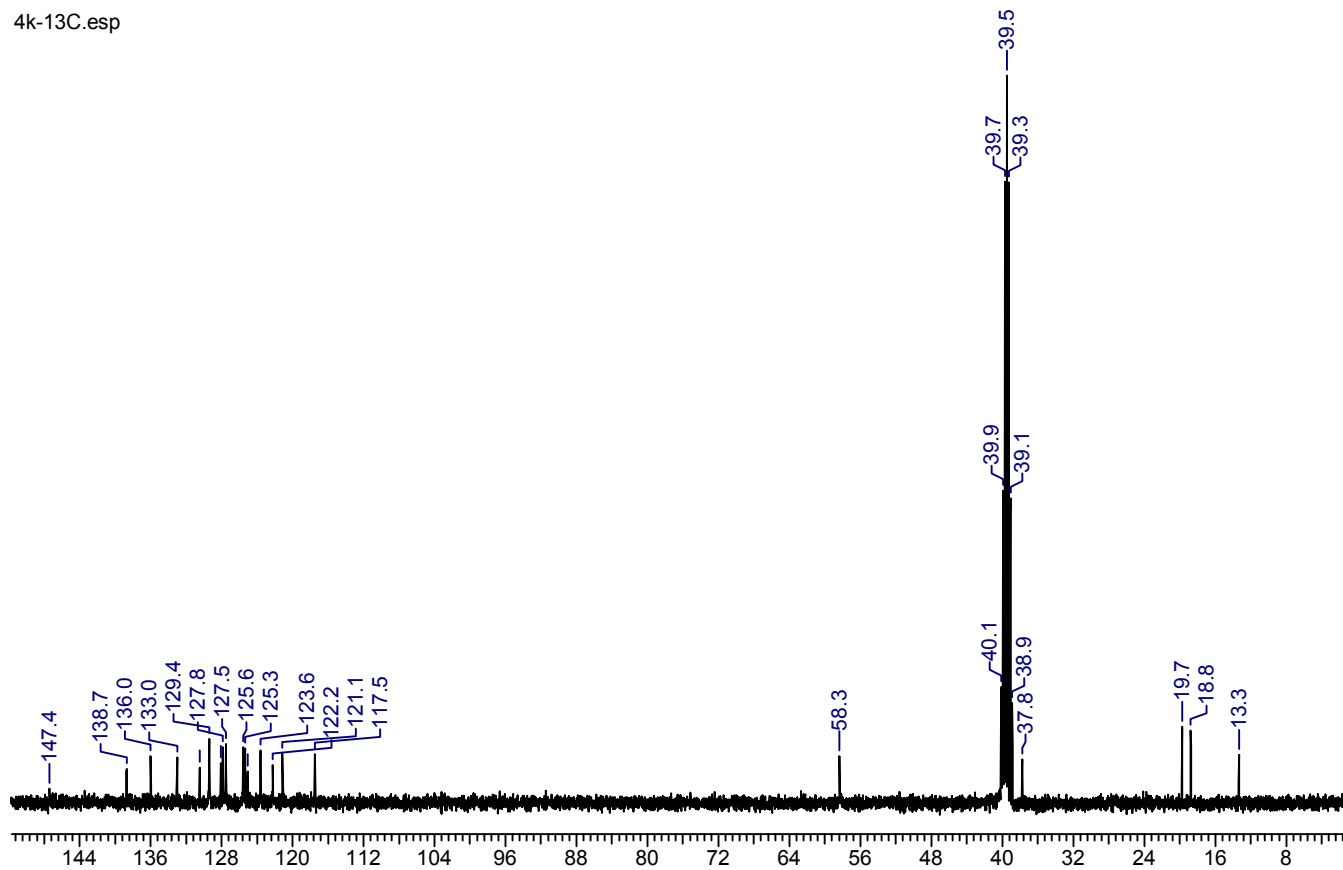

<sup>13</sup>C NMR spectrum (100 MHz, DMSO-*d*<sub>6</sub>) of compound **4k**.

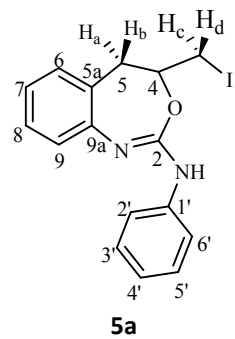

|                     | <sup>13</sup> C | <sup>1</sup> H                                          |
|---------------------|-----------------|---------------------------------------------------------|
| 2                   | 152.0           | -                                                       |
| 4                   | 57.9            | 4.92-4.81 (m)                                           |
| 5                   | 34.6            | <i>H<sub>a</sub></i> 2.94 (dd; <i>J</i> = 16.2; 2.1 Hz) |
|                     |                 | <i>H<sub>b</sub></i> 3.42 (dd; <i>J</i> = 16.2, 7.0 Hz) |
| 5a                  | 129.0           |                                                         |
| 6                   | 124.8           | 7.23 (d; <i>J</i> = 7.2 Hz)                             |
| 7                   | 122.1           | 6.93 (td; <i>J</i> = 7.5; 1.0 Hz)                       |
| 8                   | 127.1           | 7.14 (t; <i>J</i> = 8.1 Hz)                             |
| 9                   | 114.7           | 7.74 (d, <i>J</i> = 8.1 Hz)                             |
| 9a                  | 143.0           | -                                                       |
| 1'                  | 139.3           | -                                                       |
| 2', 6'              | 120.6           | 7.52 (dd; <i>J</i> = 8.7, 0.9 Hz)                       |
| 3', 5'              | 128.4           | 7.34-7.26 (m)                                           |
| 4'                  | 122.7           | 7.07-7.00 (m)                                           |
| -CH <sub>2</sub> -I | 11.8            | <i>H<sub>c</sub></i> 3.54 (dd; <i>J</i> = 10.2, 3.0 Hz) |
|                     |                 | <i>H<sub>d</sub></i> 3.48-3.32 (m)                      |
| -NH                 | -               | 8.85 (s)                                                |

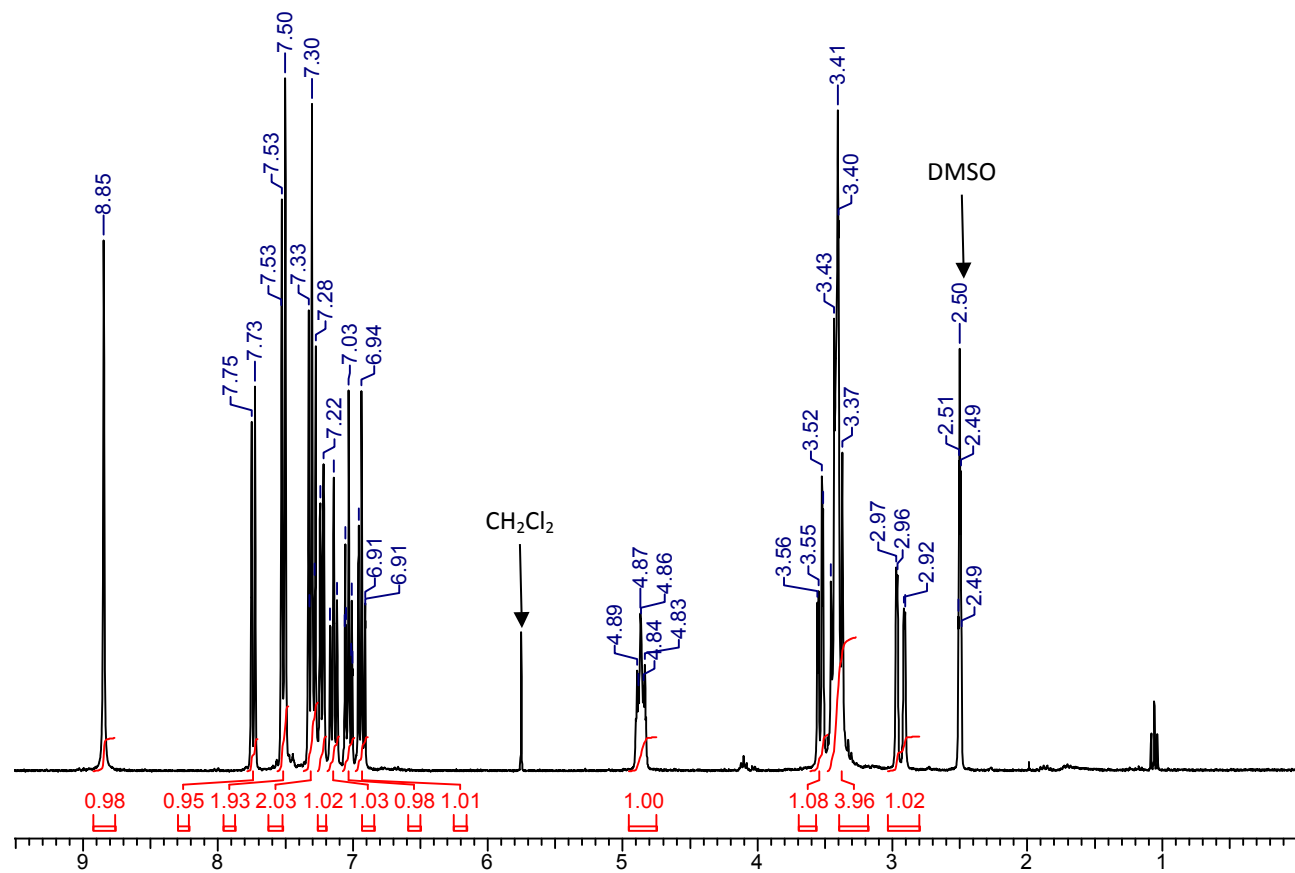

$^1\text{H}$  NMR spectrum (300 MHz,  $\text{DMSO-}d_6$ ) of compound **5a**.

Walter  
Amostra WM62F1  
Solicitacao N. K1018\_11  
26.12.12 UFPE

Pulse Sequence: gCOSY

Solvent: DMSO  
Temp. 25.0 C / 298.1 K  
File: K1018\_1.gCOSY  
UNITYplus-300 "UFPEu300"

Relax. delay 1.000 sec  
Acq. time 0.228 sec  
Width 4499.4 Hz  
2D Width 4499.4 Hz  
2 repetitions  
128 increments  
OBSERVE H1, 299.9484859 MHz  
DATA PROCESSING  
Sq. sine bell 0.114 sec  
F1 DATA PROCESSING  
Sq. sine bell 0.028 sec  
FT size 2048 x 2048  
Total time 5 min, 41 sec

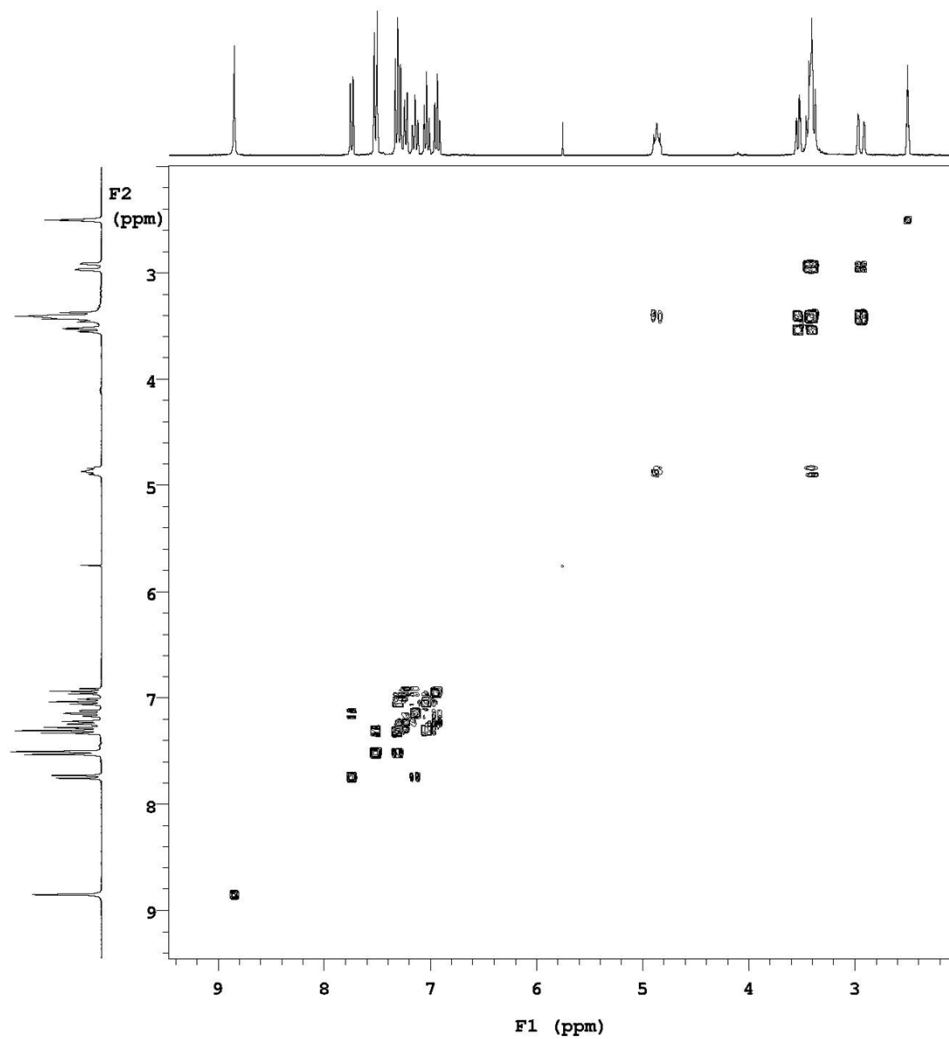

COSY spectrum of compound **5a** (DMSO- $d_6$ )

Walter  
Amostra WM62F1  
Solicitacao N. K1018\_11  
26.12.12 UFPE

Pulse Sequence: gHMBC

Solvent: DMSO  
Temp. 25.0 C / 298.1 K  
File: K1018\_11.gHMBC  
UNITYplus-300 "UFPEu300"

Relax. delay 1.000 sec  
Acq. time 0.228 sec  
Width 4499.4 Hz  
2D Width 18859.0 Hz  
8 repetitions  
400 increments  
OBSERVE H1, 299.9484859 MHz  
DATA PROCESSING  
Sine bell 0.114 sec  
F1 DATA PROCESSING  
Sine bell 0.011 sec  
FT size 2048 x 8192  
Total time 1 hr, 11 min, 12 sec

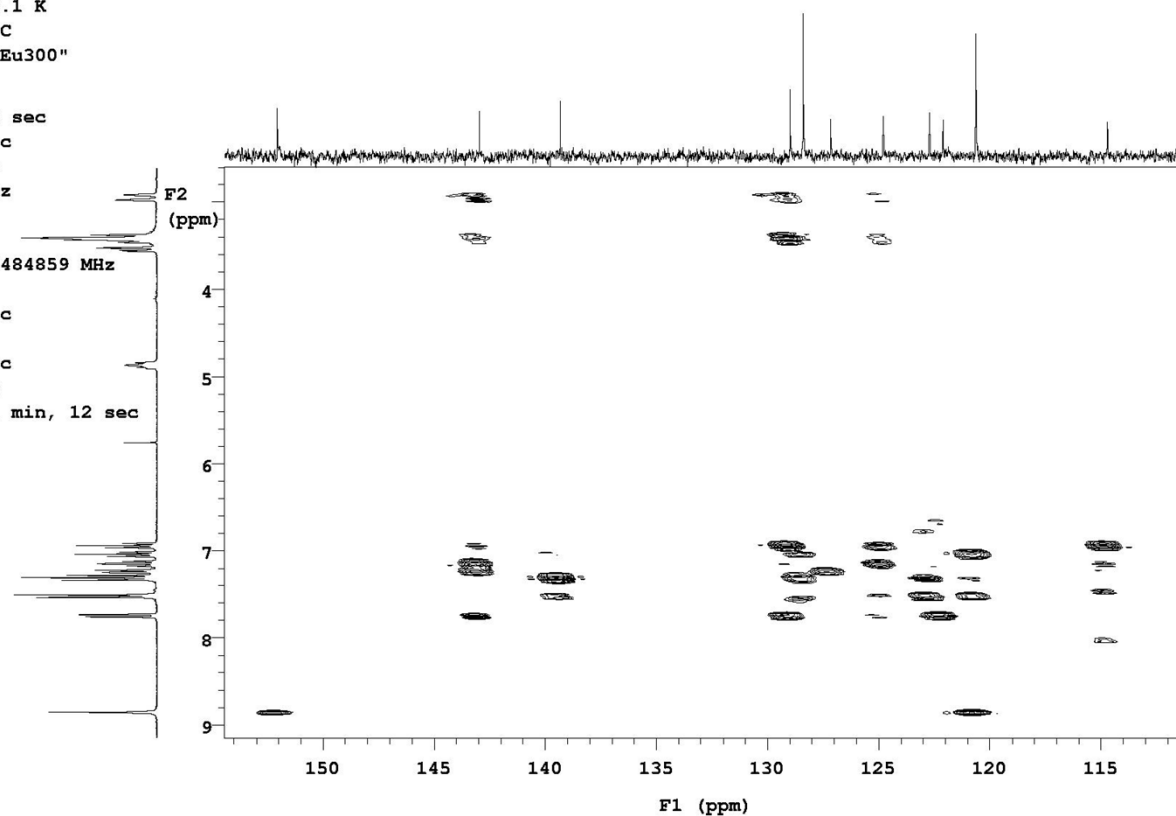

HMBC of compound **5a** (DMSO- $d_6$ )

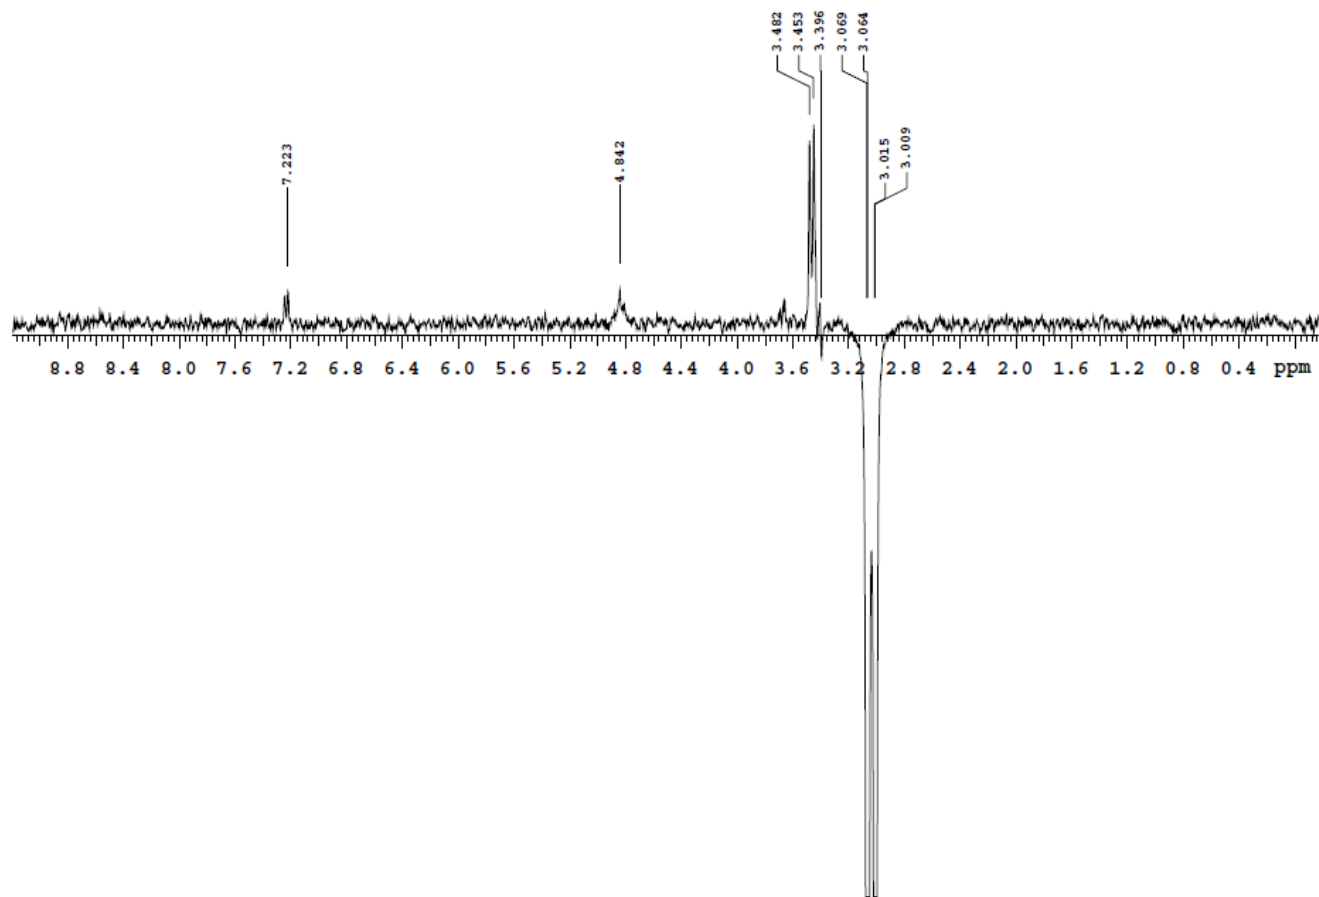

NOESY 1D spectrum of **5a** ( $\text{Acetone-}d_6$ , 300 MHz) irradiating the signal at  $\delta$  2.94.

5a-13C.esp

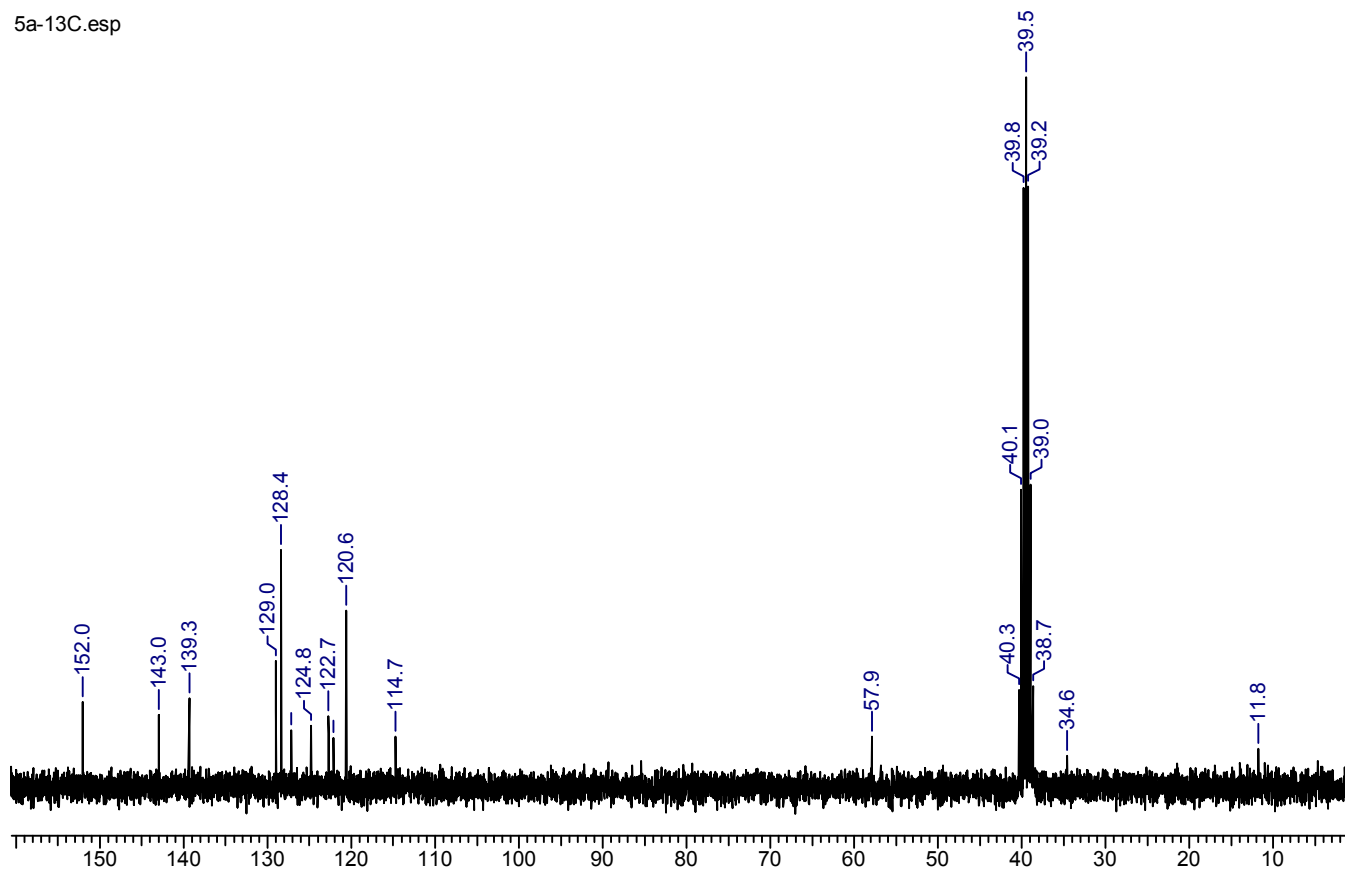

$^{13}\text{C}$  NMR spectrum (75 MHz,  $\text{DMSO-d}_6$ ) of compound **5a**.



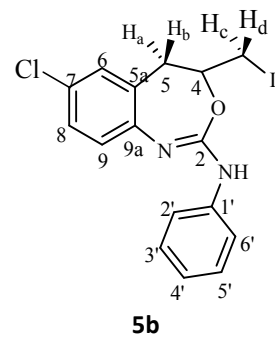

|                     | <sup>13</sup> C |                      | <sup>1</sup> H                    |
|---------------------|-----------------|----------------------|-----------------------------------|
| 2                   | 151.7           |                      | -                                 |
| 4                   | 61.1            |                      | 4.72-4.61 (m)                     |
| 5                   | 34.5            | <i>H<sub>a</sub></i> | 2.98 (d; <i>J</i> = 16.8 Hz)      |
| 5 <sup>a</sup>      | 128.2           | <i>H<sub>b</sub></i> | 3.42-3.24 (m)                     |
| 6                   | 126.1           |                      |                                   |
| 8                   | 127.8           |                      | 7.44-7.27 (m)                     |
| 9                   | 114.8           |                      |                                   |
| 2', 6'              | 120.2           |                      |                                   |
| 9a                  | 140.4           |                      | -                                 |
| 1'                  | 137.6           |                      | -                                 |
| 7                   | 132.0           |                      |                                   |
| 3', 5'              | 129.1           |                      | 7.23-7.16 (m)                     |
| 4'                  | 124.0           |                      | 7.11 (t; <i>J</i> = 8.0 Hz)       |
| -CH <sub>2</sub> -I | 9.3             | <i>H<sub>c</sub></i> | 3.59 (dd; <i>J</i> = 9.6; 2.8 Hz) |
|                     |                 | <i>H<sub>d</sub></i> | 3.42-3.24 (m)                     |
| -NH                 | -               |                      | -                                 |

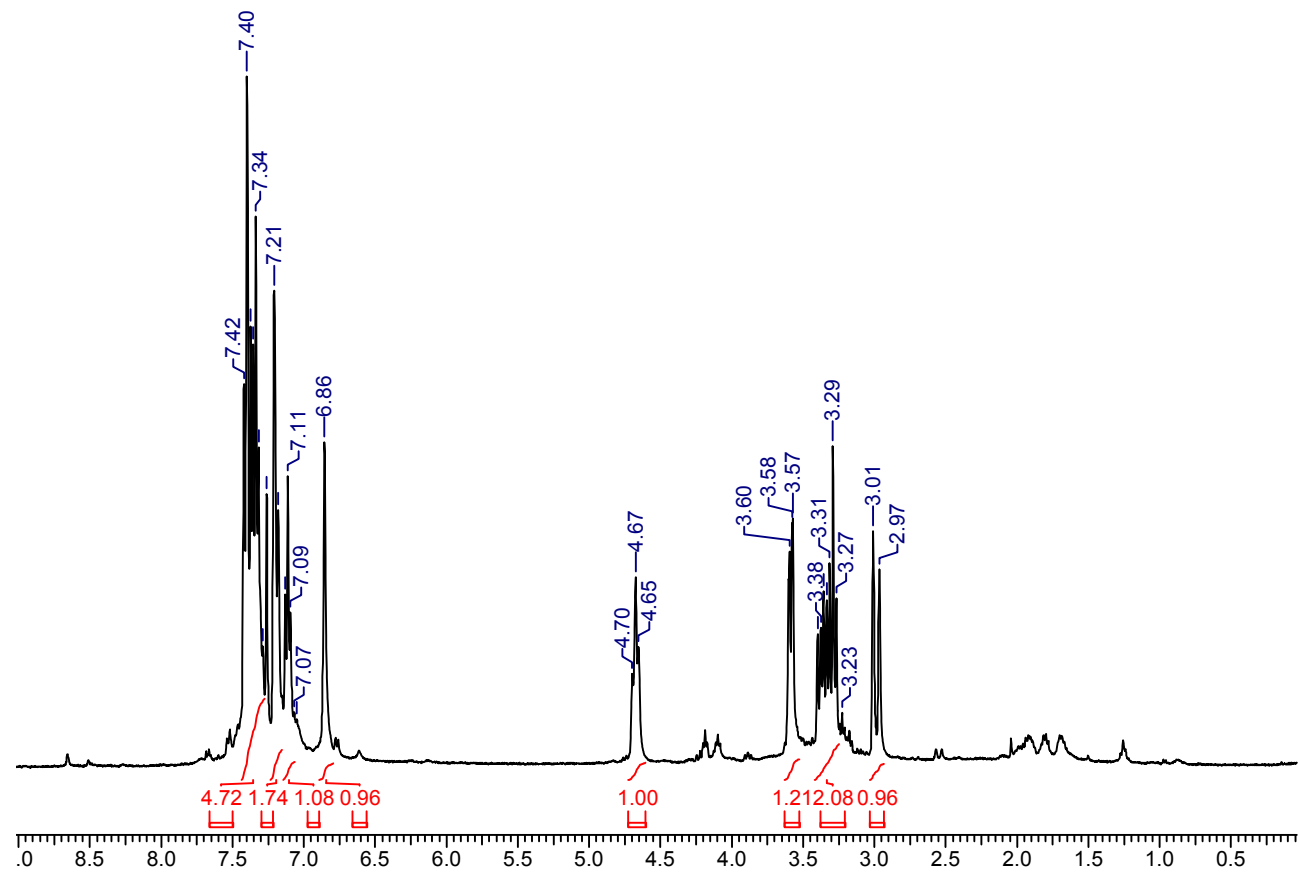

<sup>1</sup>H NMR spectrum (400 MHz, CDCl<sub>3</sub>) of compound **5b**.

5b-13C.esp

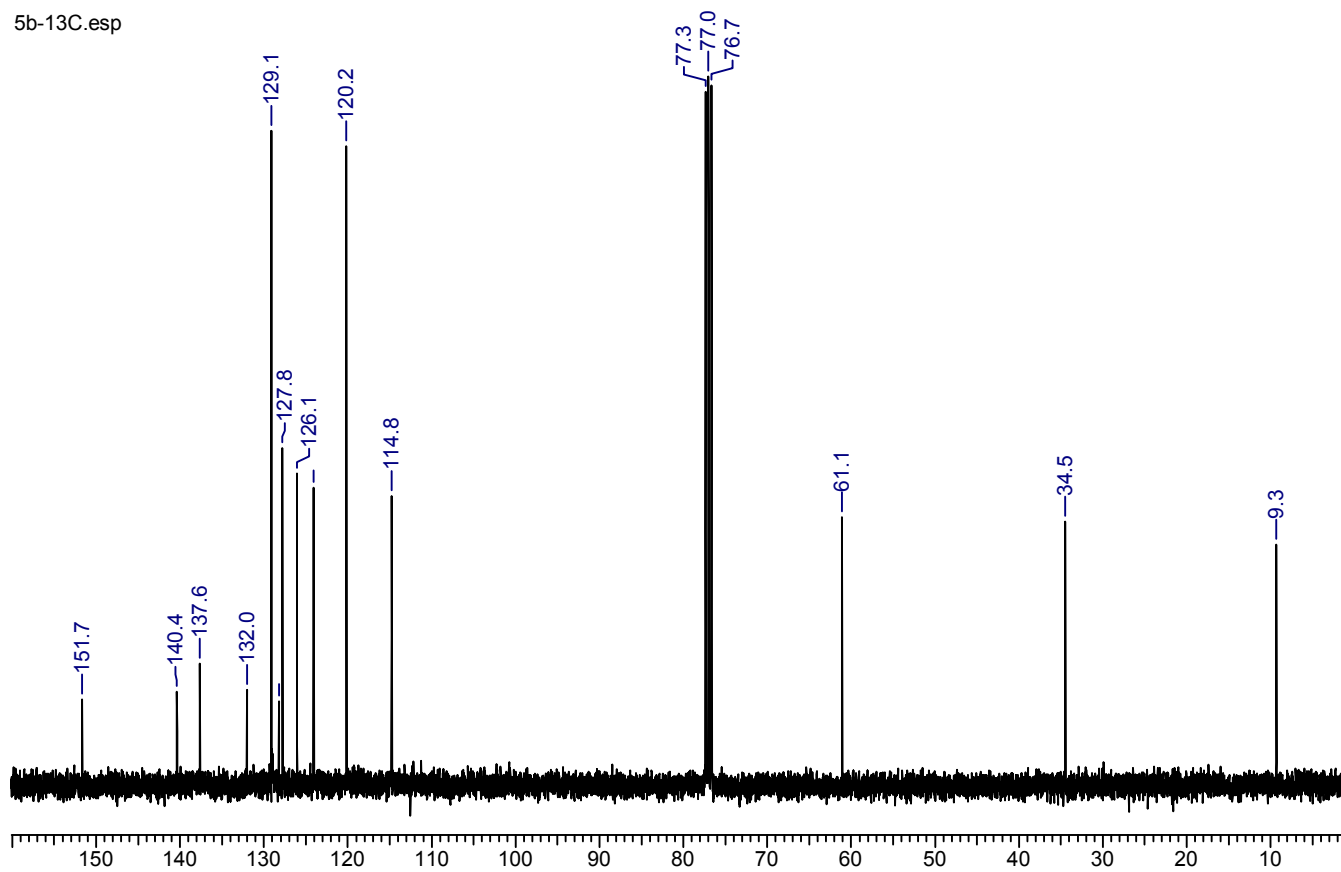

<sup>13</sup>C NMR spectrum (100 MHz, CDCl<sub>3</sub>) of compound **5b**.

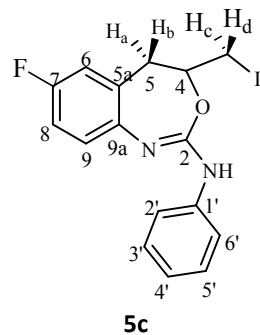

|                     | <sup>13</sup> C               |                      | <sup>1</sup> H                     |
|---------------------|-------------------------------|----------------------|------------------------------------|
| 2                   | 151.8                         |                      | -                                  |
| 4                   | 61.2                          |                      | 4.69 (br s)                        |
| 5                   | 34.7                          | <i>H<sub>a</sub></i> | 2.99 (d; <i>J</i> = 16.8 Hz)       |
|                     |                               | <i>H<sub>b</sub></i> | 3.37 (dd; <i>J</i> = 16.8; 9.6 Hz) |
| 5a                  | 132.2 (d, <i>J</i> = 8.5 Hz)  |                      | -                                  |
| 6                   | 114.1 (d, <i>J</i> = 23.2 Hz) |                      | 7.15-7.06 (m)                      |
| 8                   | 113.3 (d, <i>J</i> = 24.0 Hz) |                      |                                    |
| 9                   | 114.6 (d, <i>J</i> = 8.5 Hz)  |                      | 7.44-7.29 (m)                      |
| 2', 6'              | 120.1                         |                      |                                    |
| 9a                  | -                             |                      | -                                  |
| 1'                  | 137.7                         |                      | -                                  |
| 7                   | 159.0 (d, <i>J</i> = 240.8)   |                      | -                                  |
| 3', 5'              | 129.1                         |                      | 7.01-6.83 (m)                      |
| 4'                  | 123.9                         |                      |                                    |
| -CH <sub>2</sub> -I | 9.4                           | <i>H<sub>c</sub></i> | 3.63-3.55 (m)                      |
|                     |                               | <i>H<sub>d</sub></i> | 3.33-3.23 (m)                      |

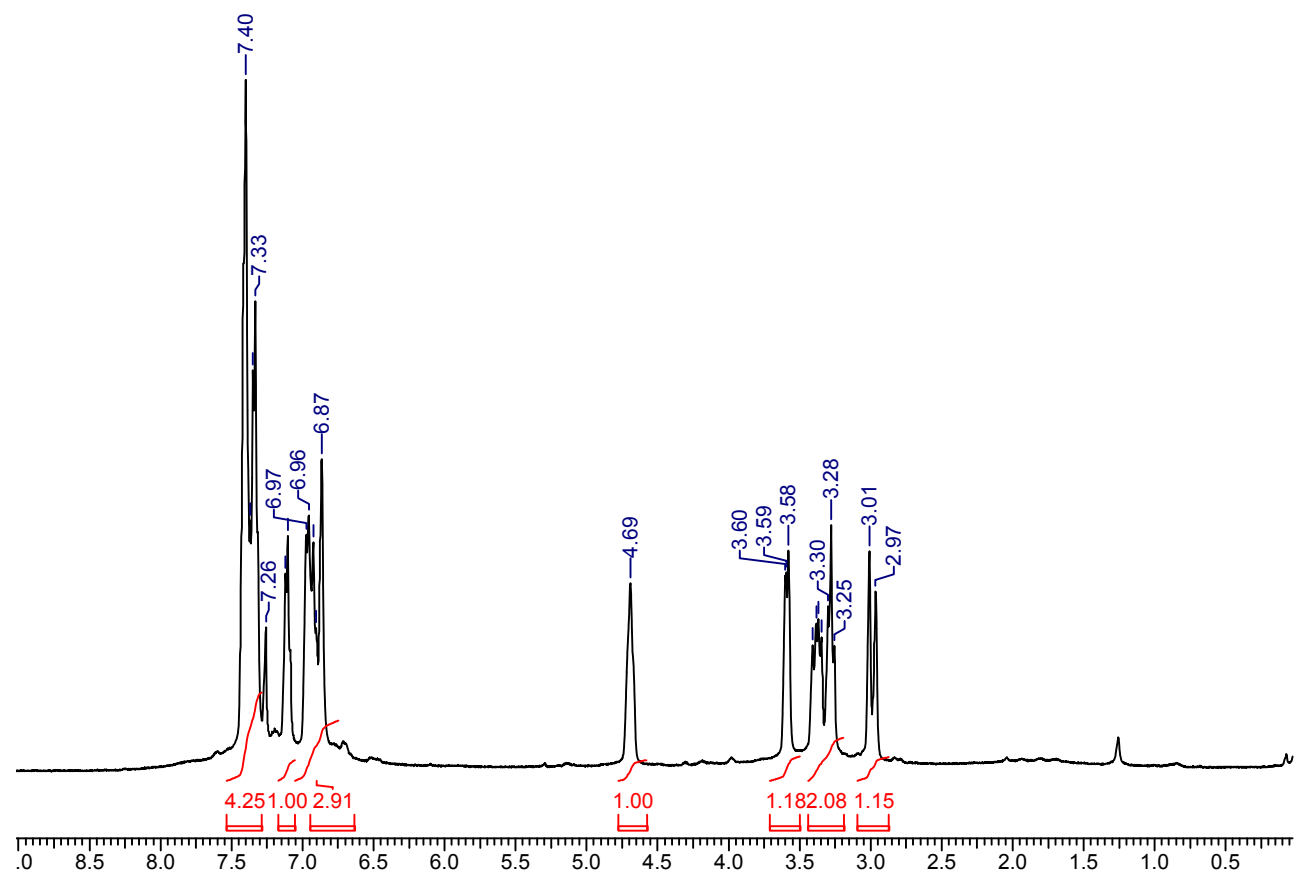

<sup>1</sup>H NMR spectrum (400 MHz, CDCl<sub>3</sub>) of compound **5c**.

5c-13C.esp

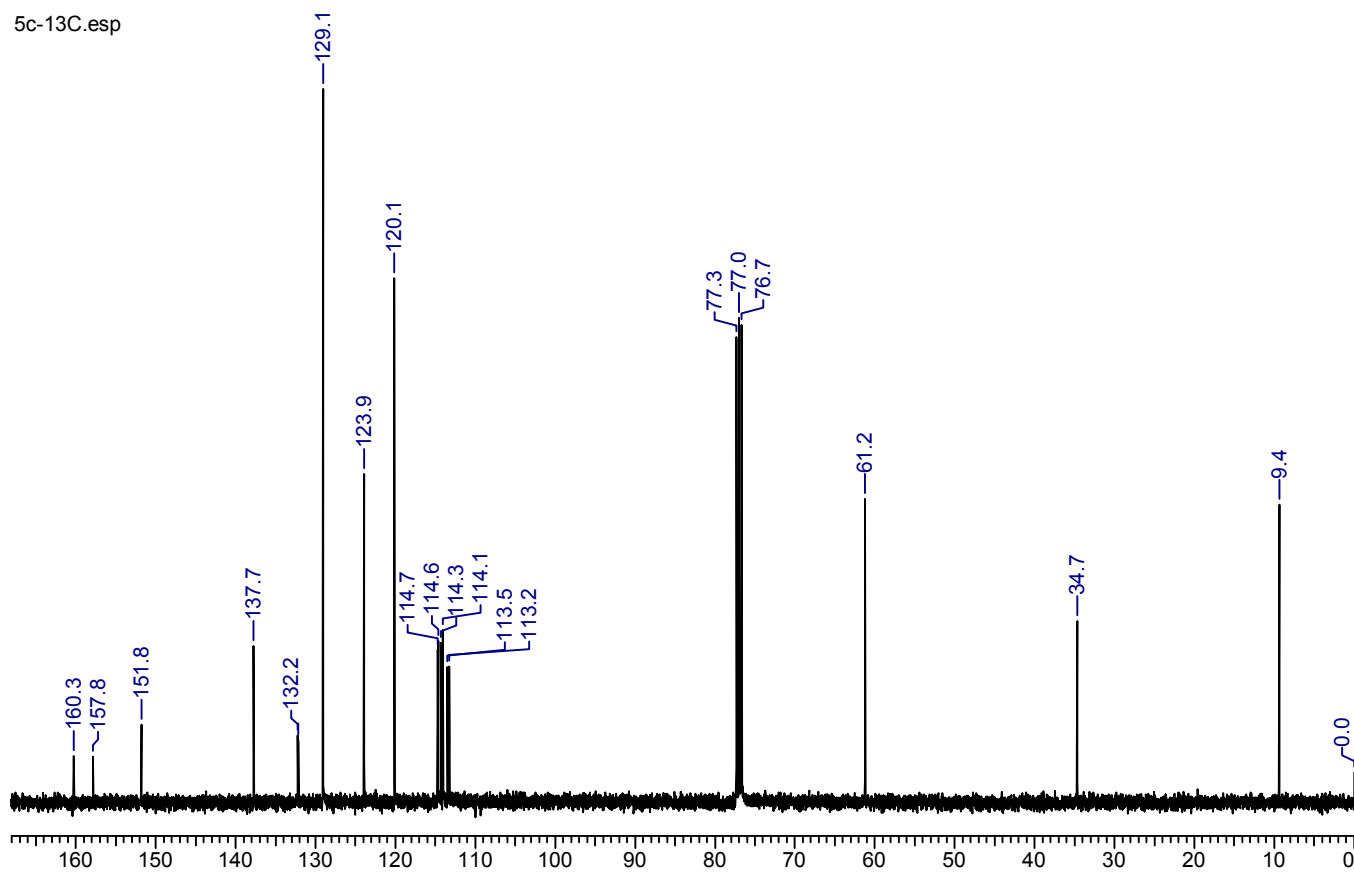

<sup>13</sup>C NMR spectrum (100 MHz, CDCl<sub>3</sub>) of compound 5c
